# Supplementary material for: Changes in H3K27ac following lipopolysaccharide stimulation of nasopharyngeal epithelial cells
Source: PubMed Central journal article supplement (PMC6307289; doi:10.1186/s12864-018-5295-4), 2018-12-27

# Additional File 4

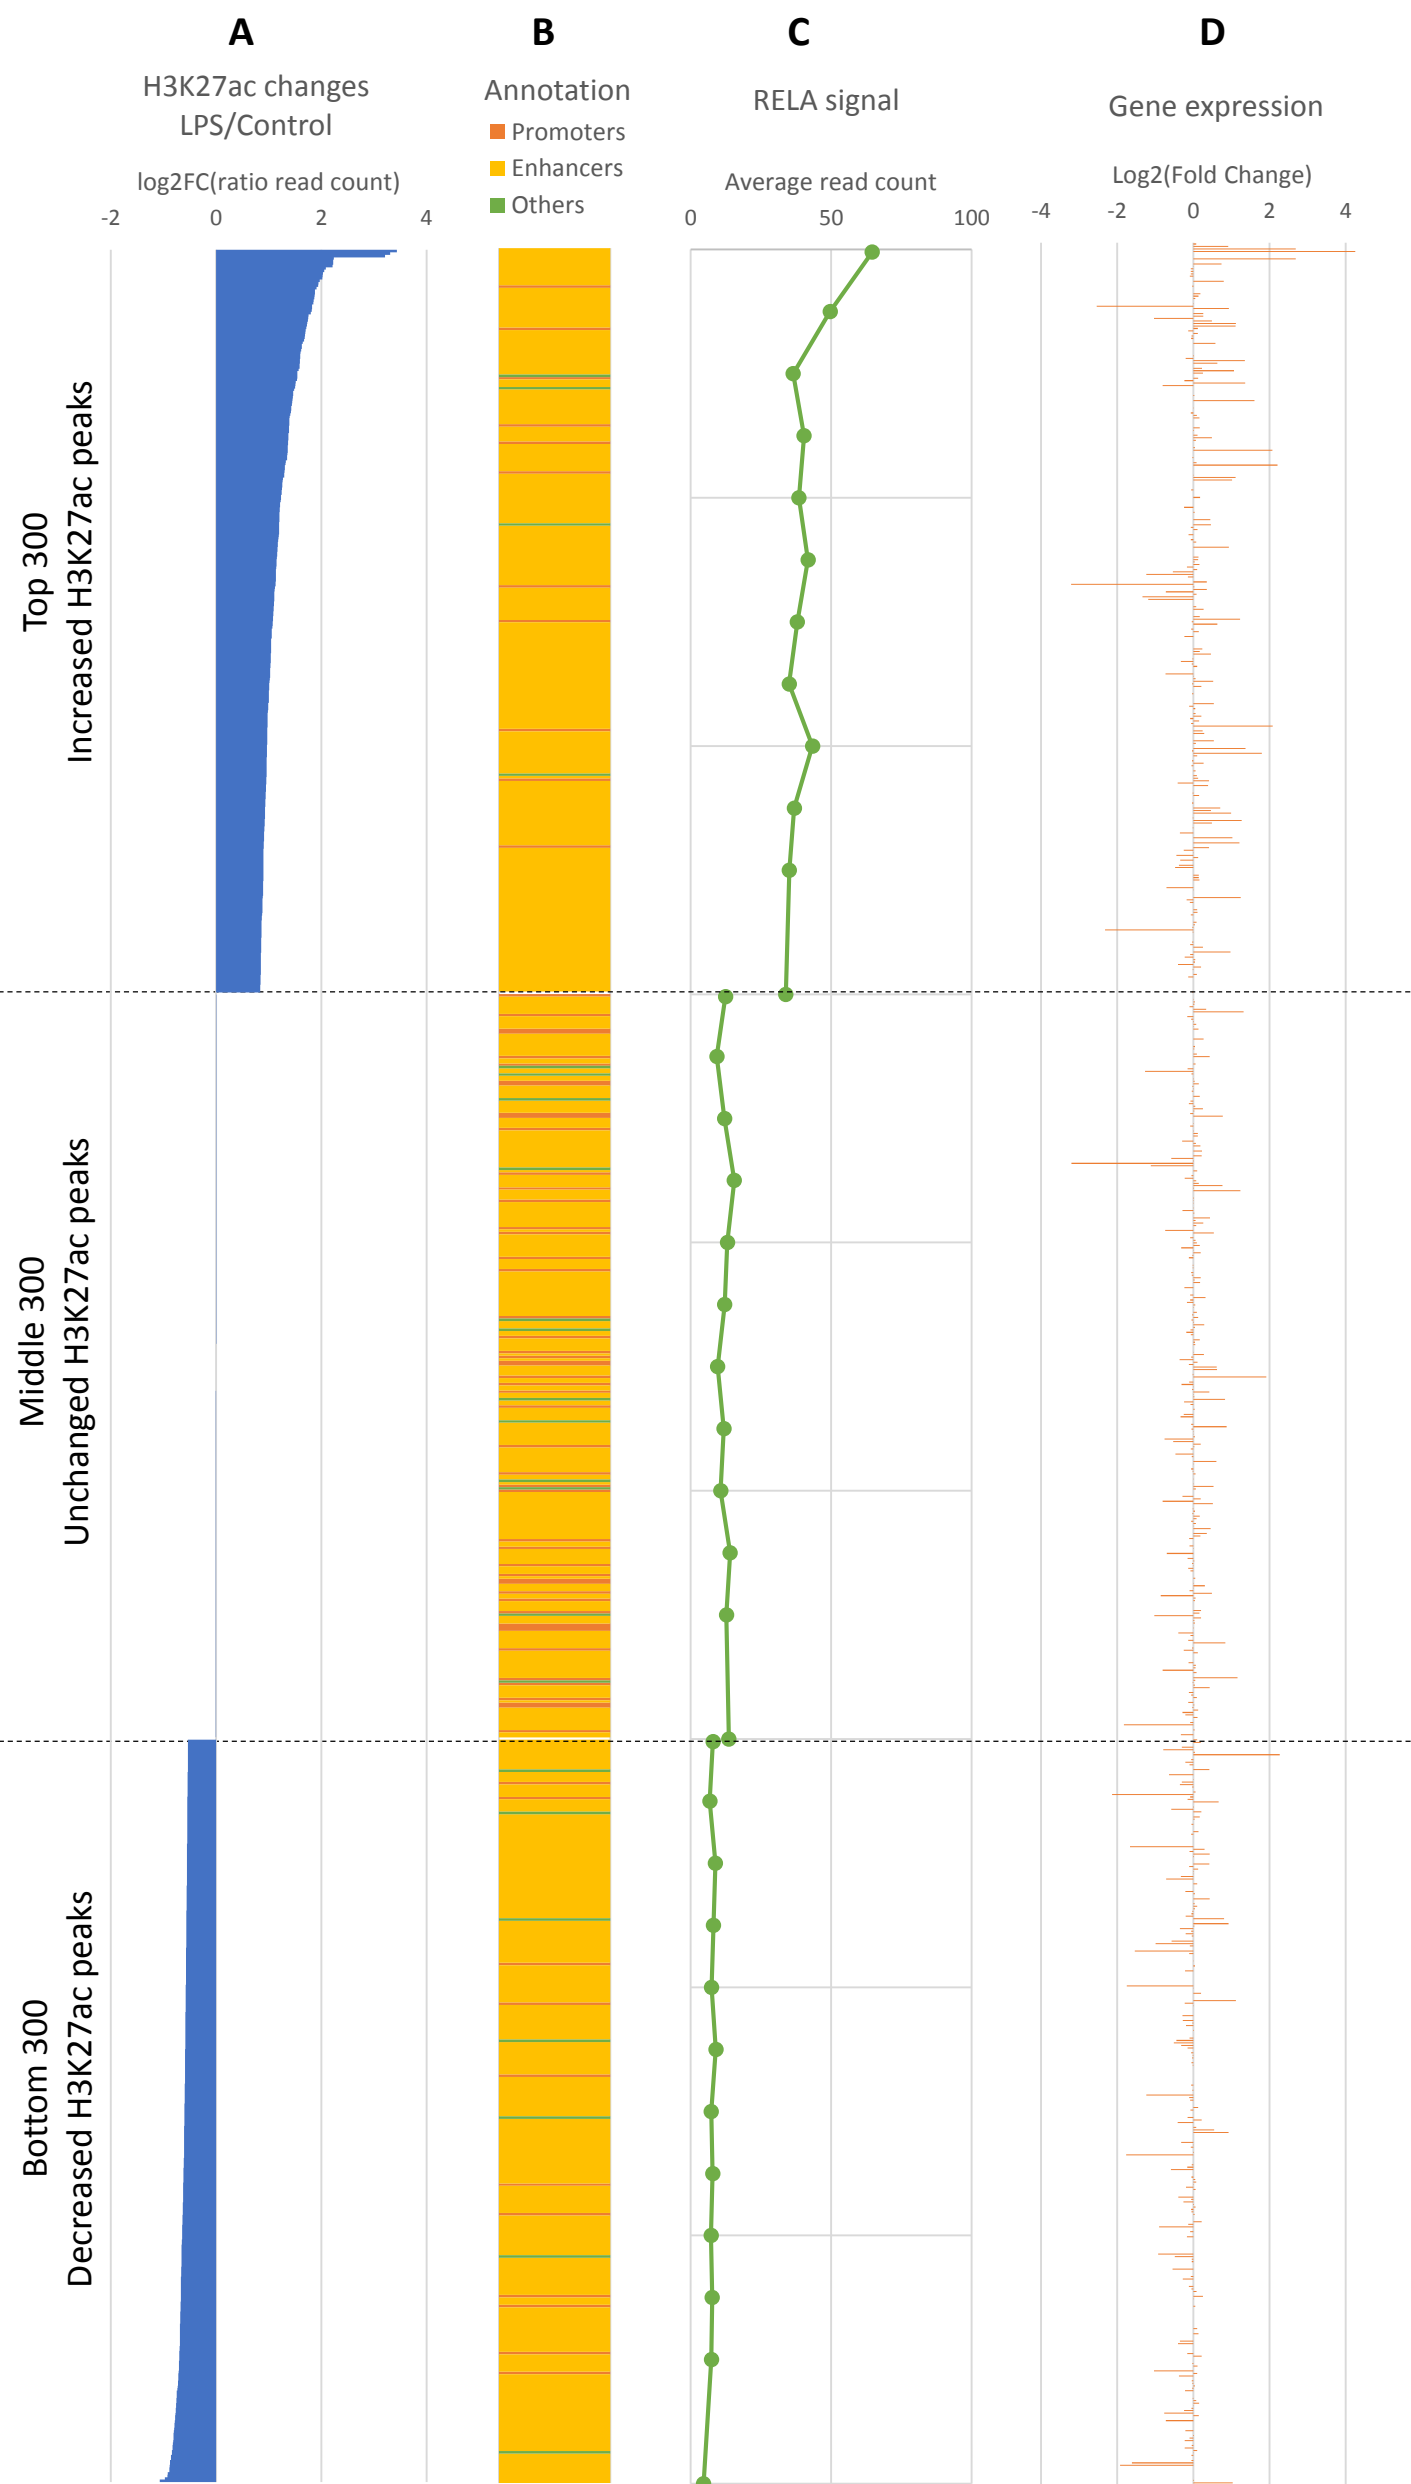

Supplement: 12864_2018_5295_MOESM4_ESM.pdf [file 12864_2018_5295_MOESM4_ESM.pdf]
