# Supplementary material for: Changes in H3K27ac following lipopolysaccharide stimulation of nasopharyngeal epithelial cells
Source: PubMed Central journal article supplement (PMC6307289; doi:10.1186/s12864-018-5295-4), 2018-12-27

# Additional File 6

**A**      ■ non LPS-increased      ■ LPS-increased

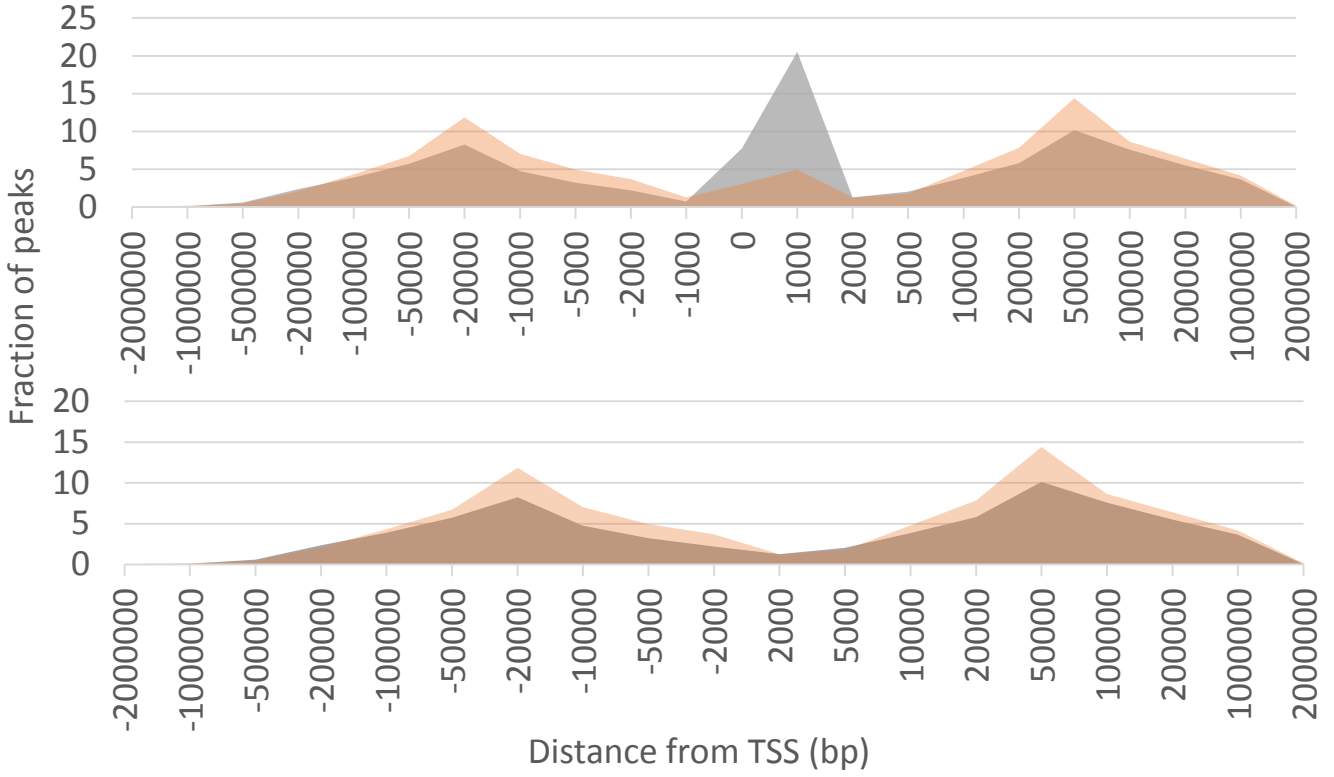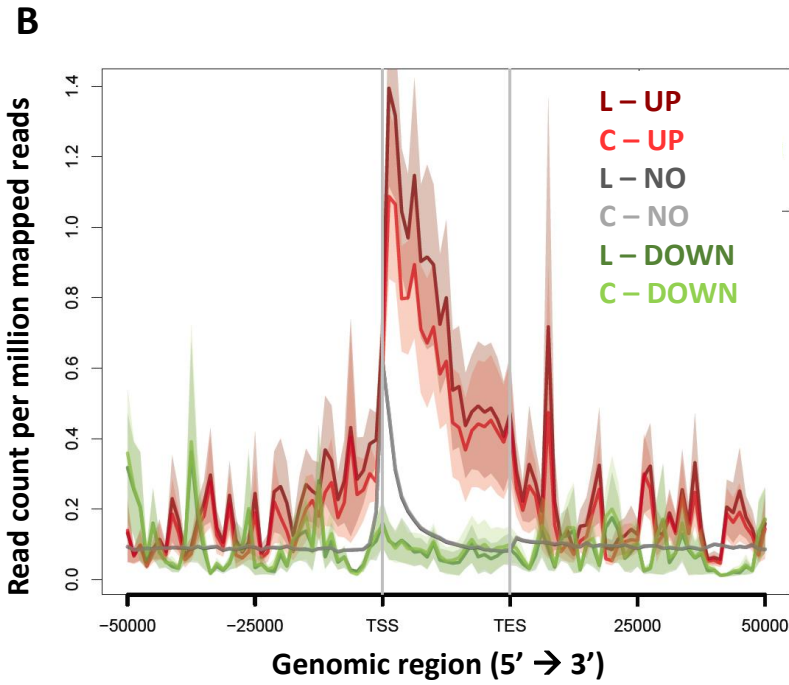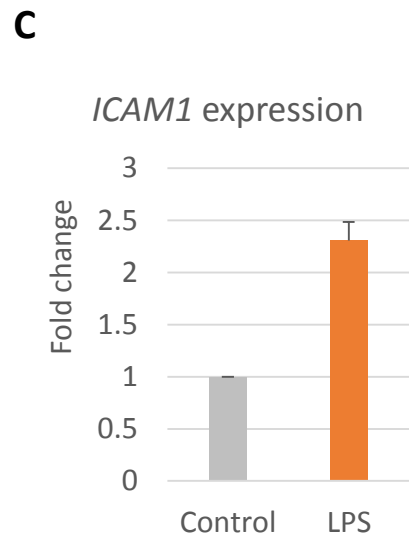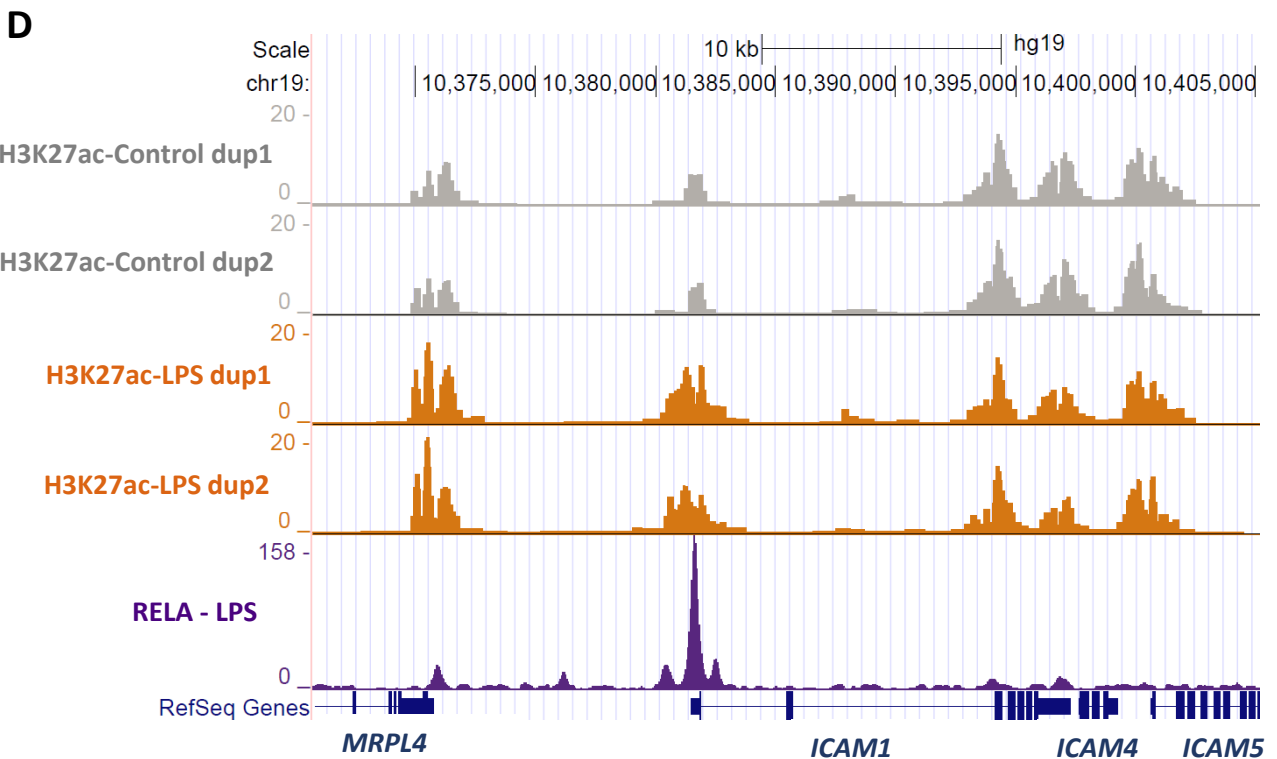

Supplement: 12864_2018_5295_MOESM6_ESM.pdf [file 12864_2018_5295_MOESM6_ESM.pdf]
