# Supplementary material for: Changes in H3K27ac following lipopolysaccharide stimulation of nasopharyngeal epithelial cells
Source: BMC Genomics. 2018 Dec 27;19:969. doi: 10.1186/s12864-018-5295-4 (PMC6307289; doi:10.1186/s12864-018-5295-4)
Supplement: Supplementary file 12 — H3K27ac peaks summary. Summary of the H3K27ac peaks identified: coordinates, Annotation, changes in H3K27ac as log2FC of the ration of normalized count between LPS and Control condition, RELA signal, gene associated to each peak and its expression as log2FC after LPS stimulation compared to Control and FPKM in LPS and Control conditions. (XLSX 3301 kb) [file 12864_2018_5295_MOESM12_ESM.xlsx]

## Sheet: Additional-file-12
Chr	Start	End	Annotation	logFC(H3K27ac LPS/H3K27ac control)	RELA ChIP-seq normalized read count	Gene Associated	Gene Expression (log2FC)	Gene Expression (FPKM in LPS)	Gene Expression (FPKM in Control)
chr5	1081422	1082421	intron	3.43312	83.25	ENSG00000113504	0.0792863	21.6138	20.458
chr21	45591226	45592225	Intergenic	3.30635	12.67	ENSG00000267913	0.917114	0.126651	0.0670703
chr21	45596182	45597181	Intergenic	3.21225	61.08	ENSG00000237604	2.68811	0.221364	0.0343484
chr6	31545995	31546994	TTS	2.23978	103.01	ENSG00000232810	4.2571	6.22407	0.325507
chr11	71199861	71200860	intron	2.22789	30.46	ENSG00000254924		0.0578942	0
chr18	42467208	42468207	intron	2.22267	41.63	ENSG00000265957	0	0	0
chr21	45604732	45605731	Intergenic	2.21257	112.66	ENSG00000237604	2.68811	0.221364	0.0343484
chr5	131401613	131402612	Intergenic	2.08235	2.26	ENSG00000164399	0	0	0
chr9	87374095	87375094	intron	2.05461	63.8	ENSG00000148053	0.746934	0.0439798	0.0262062
chr5	79812081	79813080	intron	2.02863	80.54	ENSG00000242706	-0.00663348	0.0287576	0.0288901
chr14	35629295	35630294	intron	2.02618	70.73	ENSG00000100890	-0.0608922	38.5357	40.197
chr5	134360863	134361862	Intergenic	2.01895	57.01	ENSG00000224186	-0.0626144	3.15866	3.29877
chr6	160122176	160123175	Intergenic	1.97082	83.85	ENSG00000120437	-0.0655831	25.8021	27.0021
chr7	110753231	110754230	intron	1.9447	90.19	ENSG00000184903	-0.0863312	21.1115	22.4134
chr20	61076774	61077773	Intergenic	1.93677	27.9	ENSG00000260542		0.00384661	0
chr16	3114972	3115971	promoter-TSS	1.9109	29.11	ENSG00000008517	0.802056	8.89944	5.1041
chr11	67494811	67495810	Intergenic	1.87796	88.98	ENSG00000235855		0	0.00868771
chr2	231630322	231631321	intron	1.87755	75.11	ENSG00000135932	-0.0211474	63.7237	64.6646
chr18	36520386	36521385	Intergenic	1.8726	70.73	ENSG00000222704	0	0	0
chr12	90353889	90354888	Intergenic	1.86899	61.38	ENSG00000258290	0	0	0
chr3	73022246	73023245	intron	1.85115	74.8	ENSG00000163605	0.187474	38.9094	34.168
chr5	127259572	127260571	Intergenic	1.84539	65.76	ENSG00000245937	0.140477	14.4409	13.1011
chr14	71413920	71414919	intron	1.82534	73.45	ENSG00000100731	0.0538843	37.9789	36.5866
chr4	3011736	3012735	intron	1.82135	105.72	ENSG00000199335	0	0	0
chr7	55044031	55045030	Intergenic	1.81753	48.26	ENSG00000146648	0.0137538	119.281	118.149
chr3	119418957	119419956	Intergenic	1.80218	43.13	ENSG00000183833	-2.53276	0.00183521	0.01062
chr1	8000778	8001777	intron	1.75757	49.47	ENSG00000049249	0.936609	3.10177	1.62055
chr5	131425422	131426421	Intergenic	1.75066	41.78	ENSG00000253067	0	0	0
chr1	169016161	169017160	intron	1.74723	41.47	ENSG00000203601	0.261859	0.0938008	0.078231
chr21	34576026	34577025	Intergenic	1.73302	38.31	ENSG00000159110	0.2617	9.36801	7.8139
chr16	31276533	31277532	intron	1.72863	45.7	ENSG00000169896	-1.03323	0.150838	0.308705
chr6	17042695	17043694	Intergenic	1.71269	84.91	ENSG00000230873	0.492323	0.177572	0.126232
chr10	104154485	104155544	promoter-TSS	1.70435	47.05	ENSG00000077150	1.12258	27.0185	12.4088
chr6	138029474	138030506	Intergenic	1.69805	7.69	ENSG00000220412	1.11103	0.388667	0.179938
chr14	24720795	24721794	intron	1.68856	21.11	ENSG00000092330	0.124981	55.5882	50.9753
chr7	135053231	135054230	intron	1.68499	19.3	ENSG00000227073	-0.126976	10.7317	11.719
chr3	64893596	64894595	intron	1.66879	14.03	ENSG00000163638	0.124006	0.783885	0.719321
chrX	46569618	46570617	intron	1.64857	36.8	ENSG00000065923	-0.045247	10.1954	10.5202
chr1	111735420	111736419	intron	1.62973	24.28	ENSG00000064886	-0.0517083	0.0474301	0.0491608
chr12	12435289	12436288	Intergenic	1.62781	43.74	ENSG00000207010	0	0	0
chr1	241705311	241706310	intron	1.61943	115.22	ENSG00000117009	0.58009	1.96535	1.31466
chr5	124271613	124272612	Intergenic	1.60291	43.28	ENSG00000249423	0	0	0
chr20	30742724	30743723	intron	1.60123	24.73	ENSG00000265736	0	0	0
chr8	40016556	40017555	Intergenic	1.6012	61.08	ENSG00000254143		0.0204793	0
chr8	56457020	56458067	Intergenic	1.59103	82.5	ENSG00000270907		0.00132987	0
chr2	119618950	119619949	Intergenic	1.59024	68.32	ENSG00000163064	0.0204612	1.07196	1.05687
chr10	99642130	99643129	intron	1.58914	87.62	ENSG00000155265	-0.200121	0.0675377	0.077587
chr14	94811669	94812668	Intergenic	1.58596	87.47	ENSG00000258597	1.35407	0.0386861	0.0151335
chr4	25653587	25654586	Intergenic	1.56516	33.33	ENSG00000157765	0.637522	0.350078	0.225036
chr12	91800620	91801619	Intergenic	1.54515	77.37	ENSG00000258100	0	0	0
chr4	2747585	2748584	intron	1.54369	47.21	ENSG00000168884	0.231077	19.0704	16.2479
chr19	45504429	45505428	exon	1.54152	12.82	ENSG00000104856	1.07442	8.29178	3.93744
chr19	50400120	50401119	promoter-TSS	1.53994	36.35	ENSG00000169136	0.256726	12.8776	10.7783
chr15	85659590	85660589	intron	1.51272	10.26	ENSG00000259270	0	0	0
chr5	90373963	90374962	intron	1.50615	12.82	ENSG00000176018	0.128993	11.1656	10.2106
chr4	187825337	187826336	Intergenic	1.49937	81.59	ENSG00000249539	-0.230896	0.0695538	0.0816257
chr6	31548876	31549875	exon	1.48097	6.94	ENSG00000227507	1.36205	18.6376	7.25059
chr7	36640396	36641395	intron	1.46379	19.91	ENSG00000136250	-0.799703	0.114595	0.19948
chr12	90451889	90452888	Intergenic	1.46354	20.36	ENSG00000257194		0.00921389	0
chr13	40449544	40450543	Intergenic	1.4616	17.65	ENSG00000212553	0	0	0
chr7	1651196	1652195	Intergenic	1.45522	61.68	ENSG00000230444	0	0	0
chr15	78374116	78375115	Intergenic	1.4472	42.53	ENSG00000166411	0.0253694	75.2701	73.9581
chr15	36706690	36707689	Intergenic	1.4427	36.95	ENSG00000259737		0.0702094	0
chr6	134567445	134568444	intron	1.43089	35.59	ENSG00000118515	1.60842	47.461	15.5652
chr7	41208596	41209595	Intergenic	1.43046	23.98	ENSG00000224017		0.014063	0
chr6	10355345	10356344	Intergenic	1.42399	48.56	ENSG00000216781	0	0	0
chr7	50880166	50881165	Intergenic	1.4071	30.01	ENSG00000106070	0.000576363	11.6255	11.6209
chr6	72043526	72044750	Intergenic	1.39648	35.59	ENSG00000199094	0	0	0
chr3	158138014	158139045	intron	1.3906	83.85	ENSG00000168779	-0.0609198	1.26259	1.31704
chr15	57307540	57308539	intron	1.3892	19.91	ENSG00000140262	0.0916555	35.7723	33.5703
chr7	92270981	92271980	intron	1.38872	17.95	ENSG00000237819	0.165597	2.82181	2.51581
chr4	122085087	122086086	promoter-TSS	1.38712	42.38	ENSG00000271302	0	0	0
chr1	230463420	230464419	intron	1.38407	18.1	ENSG00000203257	0	0	0
chr4	74641237	74642255	Intergenic	1.38299	106.63	ENSG00000249051		0	0.0306193
chr10	97312183	97313182	intron	1.37592	41.17	ENSG00000095637	0.170081	0.825409	0.733618
chr6	116338445	116339444	intron	1.37483	30.46	ENSG00000111816	0.0185928	2.78761	2.75191
chr7	117041916	117042915	intron	1.37296	59.12	ENSG00000154438	0	0	0
chr4	20993137	20994136	intron	1.36617	42.38	ENSG00000163138	0.113469	15.9883	14.779
chr19	4228879	4229878	promoter-TSS	1.36453	48.56	ENSG00000105246	0.492387	1.13603	0.807541
chr6	56654845	56655844	intron	1.36351	21.27	ENSG00000151914	0.067854	140.289	133.843
chr5	179894022	179895021	Intergenic	1.36076	48.56	ENSG00000200555	0	0	0
chr10	58297435	58298434	Intergenic	1.35984	70.43	ENSG00000238707	0	0	0
chr5	58779172	58780171	intron	1.35562	14.33	ENSG00000152931	0.0491186	0.084169	0.0813516
chr21	43834788	43835787	intron	1.35105	42.53	ENSG00000160185	2.08135	0.0399884	0.00944898
chr17	36058211	36059210	intron	1.34999	22.62	ENSG00000259549	0	0	0
chr6	133007676	133008675	intron	1.32499	51.43	ENSG00000218991	0	0	0
chr4	106779987	106780986	Intergenic	1.31927	30.01	ENSG00000138785	-0.0202287	12.6633	12.8421
chr17	9292237	9293236	intron	1.30605	111	ENSG00000225751	0	0	0
chr1	96938361	96939431	Intergenic	1.30461	7.99	ENSG00000228502	0.0847161	107.948	101.792
chr6	138137774	138138925	Intergenic	1.30115	3.32	ENSG00000118503	2.2172	238.799	51.3557
chr9	91266645	91267644	promoter-TSS	1.29693	28.5	ENSG00000228189	0	0	0
chr6	105984376	105985375	Intergenic	1.29645	30.77	ENSG00000237567	0	0	0
chr1	67253720	67254719	Intergenic	1.27067	26.39	ENSG00000172410	0	0	0
chrX	46063618	46064617	Intergenic	1.26606	8.75	ENSG00000229145	0.00212643	0.100559	0.10041
chr6	138018676	138019675	Intergenic	1.25982	38.01	ENSG00000220412	1.11103	0.388667	0.179938
chr22	18264150	18265149	Intergenic	1.25561	102.86	ENSG00000269220	1.01613	0.0815417	0.0403176
chr6	135060445	135061444	Intergenic	1.25085	15.53	ENSG00000236389	0	0	0
chr17	63851287	63852286	intron	1.24737	38.31	ENSG00000270870	0	0	0
chr5	57385022	57386021	Intergenic	1.24373	19.3	ENSG00000238899	0	0	0
chr4	14857506	14858536	Intergenic	1.2345	95.77	ENSG00000248360	-0.0567555	32.5833	33.8907
chr7	36297796	36298795	intron	1.23439	31.37	ENSG00000228770	0	0	0
chr13	42979694	42980693	Intergenic	1.22883	53.69	ENSG00000233259	0	0	0
chr11	118152140	118153139	Intergenic	1.21411	15.38	ENSG00000149573	0.175654	130.923	115.915
chr8	23463270	23464269	Intergenic	1.21245	38.76	ENSG00000252067		3.82375	0
chr6	138038276	138039275	Intergenic	1.20701	5.88	ENSG00000216097	0	0	0
chr13	111595094	111596093	Intergenic	1.20695	4.83	ENSG00000227105	0	0	0
chr20	56881174	56882173	intron	1.20478	55.2	ENSG00000124224	-0.236912	1.15865	1.36543
chr5	158606222	158607270	intron	1.2024	52.03	ENSG00000252458	0	0	0
chr2	122479636	122480635	intron	1.20172	47.36	ENSG00000155438	0.0343026	305.527	298.348
chr9	21746931	21747930	Intergenic	1.20152	30.62	ENSG00000244230		0.235731	0
chr6	32577345	32578344	Intergenic	1.19991	28.05	ENSG00000196735		0	0.0431455
chr2	201994172	201995171	exon	1.19928	20.36	ENSG00000003402	0.451623	32.5074	23.77
chr8	40056206	40057205	Intergenic	1.19539	11.31	ENSG00000254143		0.0204793	0
chr17	53310984	53311983	Intergenic	1.19527	44.04	ENSG00000108924	0.464665	0.355485	0.257599
chr14	35624695	35625694	intron	1.19467	60.93	ENSG00000100890	-0.0608922	38.5357	40.197
chr14	38137595	38138594	Intergenic	1.18871	52.48	ENSG00000139865	0.115776	2.34427	2.16349
chr6	154974376	154975375	Intergenic	1.18638	17.49	ENSG00000231316	0	0	0
chr12	33622120	33623119	Intergenic	1.18069	20.36	ENSG00000256070	-0.123118	0.0147016	0.0160113
chr8	141800861	141802019	intron	1.17501	107.68	ENSG00000252864	0	0	0
chr1	212923311	212924310	intron	1.17225	32.12	ENSG00000117697	-0.0644868	21.3303	22.3054
chr5	1139372	1140371	Intergenic	1.16895	68.32	ENSG00000113504	0.0792863	21.6138	20.458
chr10	37642785	37643784	Intergenic	1.16411	85.81	ENSG00000252621	0	0	0
chr1	7980678	7981677	intron	1.16161	12.52	ENSG00000049249	0.936609	3.10177	1.62055
chr17	9210737	9211876	intron	1.15947	29.56	ENSG00000225751	0	0	0
chr6	71848695	71849694	Intergenic	1.1523	36.2	ENSG00000221345	0	0	0
chr4	121613836	121614835	3'	1.15109	22.62	ENSG00000212359	0	0	0
chr16	67813583	67814582	intron	1.14738	26.24	ENSG00000141084	0.140371	6.93517	6.29218
chr18	3003597	3004757	intron	1.14667	34.39	ENSG00000101577	0.133571	4.25715	3.8807
chr9	32395395	32396498	intron	1.14241	67.57	ENSG00000122729	0.0356027	30.8788	30.1261
chr1	150737311	150738431	intron	1.13865	89.74	ENSG00000163131	0.166414	9.46845	8.43691
chr1	201280270	201281269	intron	1.13721	39.66	ENSG00000081277	-0.163417	2.23019	2.49767
chr11	125383668	125384748	Intergenic	1.13627	126.38	ENSG00000149557	0.108332	19.5075	18.0964
chrX	118902251	118903250	Intergenic	1.1354	25.34	ENSG00000187808	-0.534114	0.0493551	0.0714687
chr16	11306833	11307832	Intergenic	1.13513	30.77	ENSG00000263033	-1.2309	0.0167895	0.0394071
chr17	46992534	46993533	intron	1.13199	36.95	ENSG00000248278	-0.139235	5.40731	5.95518
chr15	74332814	74333813	intron	1.12778	11.61	ENSG00000260096	0	0	0
chr15	45722189	45723489	5'	1.12013	8.6	ENSG00000166920	0.359178	70.3761	54.8658
chr1	234275728	234276727	intron	1.11201	11.31	ENSG00000233332	-3.20465	0.00436707	0.0402611
chr5	66187031	66188030	intron	1.10836	68.17	ENSG00000229666	0.0273067	0.72463	0.711043
chr15	45741340	45742538	Intergenic	1.1056	36.8	ENSG00000166920	0.359178	70.3761	54.8658
chr5	176215422	176216421	Intergenic	1.10437	7.24	ENSG00000113763	-0.71619	0.0444847	0.0730812
chr3	107706257	107707663	Intergenic	1.10358	123.97	ENSG00000196776	0.0912955	311.272	292.185
chr2	139372136	139373135	Intergenic	1.10262	37.1	ENSG00000237772	-1.32943	0.0420461	0.105664
chr5	176727431	176728430	TTS	1.09739	30.92	ENSG00000270706	-1.17802	0.0165184	0.0373755
chr11	3116561	3117560	intron	1.09403	29.26	ENSG00000236710		0	0.0127315
chr7	105970031	105971030	Intergenic	1.09393	56.1	ENSG00000243438	0	0	0
chr3	190209246	190210245	Intergenic	1.0868	45.55	ENSG00000196083	0.0770759	57.6827	54.6819
chr8	90742020	90743019	Intergenic	1.08547	56.56	ENSG00000251136	0.275754	7.04564	5.81983
chr4	189370442	189371485	Intergenic	1.08135	5.43	ENSG00000249378		0.0292893	0
chr20	11176574	11177573	Intergenic	1.07925	15.38	ENSG00000230990	0	0	0
chr19	10381029	10382265	5'	1.07742	99.09	ENSG00000266978	0.173521	3.75445	3.32898
chr1	202087328	202088327	Intergenic	1.07411	61.53	ENSG00000170075	1.2285	0.110682	0.0472347
chr9	132835331	132836330	intron	1.07209	66.66	ENSG00000148358	-0.0379725	98.5232	101.151
chr18	9147129	9148128	intron	1.05782	6.94	ENSG00000101745	0.629751	7.07733	4.57399
chr5	131421772	131422888	Intergenic	1.05751	65.45	ENSG00000253067	0	0	0
chr5	130714972	130715971	intron	1.05738	23.38	ENSG00000158985	-0.0521411	18.5839	19.2678
chrX	10918972	10920117	Intergenic	1.05634	61.83	ENSG00000101871	0.146515	31.6348	28.5798
chr22	45675450	45676449	Intergenic	1.04642	34.08	ENSG00000213752	0	0	0
chr6	83909026	83910025	Intergenic	1.0458	11.16	ENSG00000013375	-0.23205	24.7056	29.0167
chr4	25692736	25693735	Intergenic	1.04549	33.48	ENSG00000249277	0	0	0
chr5	17180913	17181912	intron	1.04452	78.73	ENSG00000206814	0	0	0
chr3	172324796	172325795	Intergenic	1.04371	57.01	ENSG00000224426		0.0580641	0
chr12	48933539	48934538	Intergenic	1.04242	26.69	ENSG00000198678		0.0104613	0
chr12	49363089	49364088	intron	1.04011	17.95	ENSG00000169884	0.240218	3.1864	2.69766
chr8	67520656	67521655	intron	1.03897	4.98	ENSG00000185697	0.172166	9.93465	8.81709
chr11	65075540	65076539	Intergenic	1.03862	29.11	ENSG00000149798	0.461904	50.9209	36.97
chr12	49275939	49276938	Intergenic	1.03722	35.44	ENSG00000199394	0	0	0
chr7	94250181	94251256	intron	1.03481	40.12	ENSG00000127990	-0.0203967	140.459	142.459
chr16	23480683	23481682	intron	1.03363	25.04	ENSG00000261528	-0.325226	0.0990558	0.124103
chr1	16490378	16491377	Intergenic	1.02709	26.39	ENSG00000224621	-0.0368547	1.30212	1.33581
chr15	92516814	92517813	intron	1.02675	7.84	ENSG00000176463	0.105824	30.8669	28.6838
chr1	47471870	47472869	Intergenic	1.02582	18.1	ENSG00000259832	0	0	0
chr2	227354286	227355285	Intergenic	1.02536	49.32	ENSG00000263363	0	0	0
chr20	22709574	22710573	Intergenic	1.02321	37.7	ENSG00000215553	-0.730806	0.0334072	0.0554414
chr9	21832281	21833560	intron	1.01555	30.92	ENSG00000099810	-0.00717006	45.8364	46.0648
chr9	33185199	33186444	Intergenic	1.00911	15.84	ENSG00000086062	0.0597176	78.5604	75.3749
chr15	67408690	67409689	intron	1.00905	43.74	ENSG00000166949	0.524569	67.464	46.8987
chr9	104305295	104306294	intron	1.00601	2.41	ENSG00000155827	-0.0261888	24.4352	24.8828
chr4	74527892	74529086	Intergenic	1.00527	14.18	ENSG00000169435	0.212779	3.21614	2.77512
chr17	29891861	29892860	Intergenic	1.00515	7.84	ENSG00000221038	0	0	0
chr1	220670720	220671719	Intergenic	1.00133	28.96	ENSG00000231529	0	0	0
chr5	150563122	150564121	intron	1	9.35	ENSG00000196743	-0.0329459	33.701	34.4795
chr18	24957597	24958757	Intergenic	0.999718	36.8	ENSG00000263611	0	0	0
chr1	199195082	199196160	Intergenic	0.993395	54.14	ENSG00000228190	0	0	0
chr8	56883156	56884310	intron	0.991114	29.26	ENSG00000199405		1.80498	0
chr6	127891995	127892994	Intergenic	0.990964	25.34	ENSG00000184530	0.537848	0.491427	0.338494
chr2	134973650	134974649	Intergenic	0.98548	56.41	ENSG00000152127	-0.109499	29.1728	31.4731
chr6	37016276	37017275	Intergenic	0.980063	39.82	ENSG00000226976	0.0570097	84.4189	81.1481
chr16	59497483	59498482	Intergenic	0.979521	35.14	ENSG00000238601	0	0	0
chr8	19522620	19523619	intron	0.979054	36.5	ENSG00000147408	0.0649784	0.503916	0.481723
chr4	103639487	103640541	intron	0.978454	68.77	ENSG00000109323	0.213425	12.0624	10.4037
chr1	91480861	91481881	intron	0.976758	23.38	ENSG00000122482	-0.0791883	13.7018	14.4749
chr4	69207036	69208035	intron	0.976373	31.37	ENSG00000083896	0.152432	113.439	102.065
chr3	158429046	158430045	intron	0.97346	34.84	ENSG00000118855	-0.0523914	48.1636	49.9448
chr2	228677572	228678571	promoter-TSS	0.972519	81.89	ENSG00000115009	2.08914	71.316	16.7607
chr18	71615547	71616778	Intergenic	0.972228	16.44	ENSG00000263655	0	0	0
chr3	188003546	188004545	intron	0.971408	38.01	ENSG00000145012	0.248519	23.5239	19.8015
chr5	76126472	76127471	intron	0.97039	92.75	ENSG00000264391	0.289282	0.313819	0.256801
chr13	71865044	71866043	Intergenic	0.970157	23.07	ENSG00000225801	0	0	0
chr8	48677683	48678682	Intergenic	0.96926	30.01	ENSG00000211562	0	0	0
chr9	136343381	136344560	intron	0.968331	33.78	ENSG00000160326	0.539811	11.0088	7.57253
chr6	30463926	30464925	Intergenic	0.967729	24.88	ENSG00000204592	0.0744433	122.973	116.788
chr5	110462631	110463630	3'	0.967127	11.91	ENSG00000253613		0.0325439	0
chr1	171993461	171994460	intron	0.966787	49.02	ENSG00000180999	1.37615	0.0592877	0.0228404
chr6	147271326	147272325	intron	0.964921	10.86	ENSG00000164506	-0.0279842	4.72795	4.82055
chr1	155096820	155097819	Intergenic	0.961818	141.92	ENSG00000169242	1.8036	62.3015	17.8468
chr15	92496189	92497539	intron	0.961437	82.95	ENSG00000176463	0.105824	30.8669	28.6838
chr6	126188326	126189350	intron	0.960944	114.77	ENSG00000232131	0	0	0
chr10	72608933	72609932	intron	0.960759	20.21	ENSG00000237998	-0.0287342	0.011266	0.0114926
chr8	39798570	39799569	intron	0.960139	3.32	ENSG00000131203	0.275266	3.11304	2.5723
chr5	77701831	77702830	intron	0.959678	21.27	ENSG00000085365	-0.0431986	21.5234	22.1776
chr15	79972789	79973839	Intergenic	0.958738	43.43	ENSG00000259208	0	0	0
chr12	11991739	11992738	exon	0.957758	11.46	ENSG00000139083	0.0630221	7.42135	7.10414
chr6	91107576	91108575	Intergenic	0.956383	45.24	ENSG00000252676	0	0	0
chr13	31308418	31309543	promoter-TSS	0.956255	35.29	ENSG00000132965	0.0963606	1.50305	1.40593
chr11	8861068	8862067	intron	0.954058	49.47	ENSG00000166444	0.130265	79.8732	72.9772
chr6	137582295	137583350	Intergenic	0.946187	49.92	ENSG00000027697	0.417059	77.6372	58.1463
chr2	143591450	143592465	Intergenic	0.945717	61.08	ENSG00000229781	-0.405533	0.0167832	0.0222307
chr22	39617238	39618237	Intergenic	0.945391	41.17	ENSG00000100311	0.388777	22.0799	16.8641
chr6	156115976	156116975	Intergenic	0.944379	9.5	ENSG00000238789	0	0	0
chr3	23709546	23710572	Intergenic	0.943282	52.33	ENSG00000212269	0	0	0
chr14	82003745	82004744	Intergenic	0.939022	41.17	ENSG00000071537	-0.0109616	63.4357	63.9195
chr2	97539386	97540385	Intergenic	0.937469	19.15	ENSG00000168758	0.155311	7.03724	6.31901
chr10	30876285	30877284	Intergenic	0.937205	94.56	ENSG00000230298	0	0	0
chr21	18807682	18808681	Intergenic	0.936603	15.53	ENSG00000232560	0	0	0
chr15	41453290	41454289	Intergenic	0.931395	43.28	ENSG00000157021	-0.0328854	0.918151	0.93932
chr7	107874881	107875880	intron	0.930649	27.15	ENSG00000266112	0	0	0
chr9	22052545	22053544	intron	0.929877	38.46	ENSG00000147883	0.706843	5.54834	3.39924
chr6	143174574	143175575	intron	0.927757	75.56	ENSG00000010818	0.467147	9.16884	6.63269
chr6	44231926	44233073	intron	0.926704	20.96	ENSG00000146232	0.994336	19.5444	9.81066
chr8	80819770	80820769	Intergenic	0.924029	51.73	ENSG00000241550	0	0	0
chr15	83219914	83220913	intron	0.922611	36.35	ENSG00000259462	-0.0172928	0.00344471	0.00348625
chr3	10240473	10241545	intron	0.921491	61.99	ENSG00000134070	1.27092	9.93838	4.11841
chr2	64925650	64926649	Intergenic	0.919698	8.45	ENSG00000179833	0.489755	13.029	9.27858
chr5	71698122	71699121	Intergenic	0.916424	17.19	ENSG00000251108	0	0	0
chr2	38284672	38285671	intron	0.911695	60.33	ENSG00000138061	-0.0154444	5.18131	5.23708
chr5	111006422	111007421	intron	0.911376	15.38	ENSG00000221310	0	0	0
chr2	131581036	131582035	Intergenic	0.910624	7.69	ENSG00000136002	-0.352544	7.57135	9.66717
chr14	83630007	83631044	Intergenic	0.908771	39.21	ENSG00000252369	0	0	0
chr12	89784289	89785288	Intergenic	0.90677	15.99	ENSG00000271259	1.03035	0.211292	0.103447
chr3	23202946	23204113	Intergenic	0.904015	71.34	ENSG00000215016		0.0269974	0
chr19	42636379	42637378	promoter-TSS	0.902649	5.73	ENSG00000254887	1.2113	0.35526	0.153429
chr8	55083970	55084969	Intergenic	0.90133	46.3	ENSG00000251835	0	0	0
chr14	33075470	33076469	intron	0.901163	25.34	ENSG00000258580	0.41221	0.081755	0.0614366
chr17	48217811	48218810	intron	0.900464	15.68	ENSG00000236472	-0.24736	4.2702	5.06887
chr6	42268426	42269500	intron	0.900397	54.29	ENSG00000048544	-0.00734911	63.1418	63.4642
chr6	137978426	137979425	Intergenic	0.900177	69.53	ENSG00000230533	-0.445289	0.219518	0.298893
chr5	90397672	90398671	intron	0.89961	15.99	ENSG00000176018	0.128993	11.1656	10.2106
chr11	79651661	79652660	Intergenic	0.898226	18.4	ENSG00000254471	-0.337165	0.600341	0.758394
chr6	122118776	122119775	Intergenic	0.897959	78.27	ENSG00000220184	0	0	0
chr4	185249486	185250491	Intergenic	0.896865	80.84	ENSG00000180712	-0.373766	0.152655	0.1978
chr7	158224731	158225730	intron	0.896808	37.25	ENSG00000155093	-0.477596	0.11913	0.165879
chr6	87198307	87199306	Intergenic	0.896639	31.22	ENSG00000221101	0	0	0
chr10	43801080	43802079	Intergenic	0.896544	5.73	ENSG00000224265	0	0	0
chr5	142236781	142237780	intron	0.896419	48.86	ENSG00000145819	0.147433	15.1362	13.6658
chr14	70151595	70152706	intron	0.895797	76.77	ENSG00000100650	0.14749	563.448	508.692
chr12	124717589	124718588	intron	0.895654	26.39	ENSG00000119242	0.166973	1.32911	1.18385
chr8	10938320	10939360	intron	0.89493	14.78	ENSG00000171044	0	0	0
chr2	88781522	88782521	Intergenic	0.894417	26.39	ENSG00000220999	0	0	0
chr1	89590832	89592069	intron	0.89328	13.42	ENSG00000234518	-0.705773	0.321132	0.523772
chr2	237881250	237882249	Intergenic	0.891685	16.29	ENSG00000202341	-0.00663348	7.46167	7.49605
chr9	81804295	81805294	Intergenic	0.887785	51.28	ENSG00000260995	0	0	0
chr5	174783813	174784829	Intergenic	0.88372	27	ENSG00000248355	0	0	0
chr2	97088736	97089735	Intergenic	0.883644	24.43	ENSG00000163121	1.24956	7.72737	3.24995
chr3	44934223	44935345	intron	0.88258	44.49	ENSG00000163810	-0.174258	0.418182	0.47187
chr3	67660584	67661583	intron	0.881973	6.18	ENSG00000172340	-0.0888511	18.0479	19.1943
chr9	86911059	86912058	intron	0.881264	13.27	ENSG00000233262	0	0	0
chr7	18906031	18907056	intron	0.879525	63.49	ENSG00000221393	0	0	0
chr15	92617514	92618513	intron	0.875405	19.3	ENSG00000176463	0.105824	30.8669	28.6838
chr2	241144122	241145121	Intergenic	0.867352	50.82	ENSG00000227479	0.11389	2.86372	2.64634
chr10	91379983	91380982	intron	0.865743	22.32	ENSG00000152782	-0.0676163	1.92867	2.02122
chr9	22169345	22170344	Intergenic	0.865383	5.73	ENSG00000236921		0	0.0282756
chr1	113278078	113279131	Intergenic	0.865297	66.51	ENSG00000234790	0	0	0
chr12	121287355	121288388	intron	0.865057	49.02	ENSG00000157837	0.0890554	42.5049	39.9605
chr15	71062790	71063988	Intergenic	0.864656	54.75	ENSG00000137831	0.047586	33.618	32.5272
chr20	10521294	10522373	intron	0.861736	43.89	ENSG00000235036	-0.0212995	6.4379	6.53365
chr13	24513693	24514692	intron	0.861547	38.91	ENSG00000196593	-2.31783	0.0271103	0.135167
chr7	55601396	55602395	intron	0.861389	11.16	ENSG00000154978	-0.0135899	57.7282	58.2745
chr11	117688790	117689789	Intergenic	0.858921	10.71	ENSG00000137726		0.0143497	0
chr1	238042270	238043269	intron	0.858741	23.23	ENSG00000237250	0	0	0
chr8	109611656	109612655	Intergenic	0.858689	122.31	ENSG00000253580	0	0	0
chr6	36723776	36724775	intron	0.856674	17.49	ENSG00000220349	-0.0277595	0.010447	0.0106499
chr4	5748835	5749991	intron	0.856113	21.87	ENSG00000072840	-0.0805958	3.4059	3.60159
chr1	224019720	224020719	intron	0.855461	12.97	ENSG00000143514	0.258906	32.6568	27.292
chr12	52510189	52511188	Intergenic	0.852126	64.1	ENSG00000265804	0	0	0
chr19	30520616	30521686	Intergenic	0.850757	32.58	ENSG00000267006	0.982023	0.0588089	0.0297731
chr1	241638632	241639819	Intergenic	0.850257	28.66	ENSG00000091483	-0.0796934	97.5696	103.111
chr11	43852299	43853489	intron	0.850084	45.85	ENSG00000246250	-0.224854	0.495374	0.578923
chr3	106930334	106931333	intron	0.849223	45.55	ENSG00000239455	0.0531356	0.0139342	0.0134303
chr11	76614011	76615010	intron	0.849114	21.57	ENSG00000078124	0.0456333	63.1062	61.1413
chr11	126215899	126216989	TTS	0.847797	31.67	ENSG00000254905	-0.402967	1.46709	1.93982
chr2	29199117	29200249	Intergenic	0.847688	31.07	ENSG00000189350	0.208672	0.122583	0.106075
chr1	10659228	10660281	intron	0.84768	46.6	ENSG00000160049	-0.0111484	39.4366	39.7426
chr1	212650970	212651969	Intergenic	0.847115	25.34	ENSG00000224535	0	0	0
chr11	44590740	44591744	intron	0.847028	30.62	ENSG00000085117	0.0985334	141.396	132.061
chr13	38488994	38489993	Intergenic	0.84235	62.29	ENSG00000133107	-0.128505	1.41431	1.54607
chr1	110419711	110420710	Intergenic	0.8418	9.05	ENSG00000235005		0.140793	0
chr12	12622307	12623306	Intergenic	0.838112	20.06	ENSG00000271370	0	0	0
chr18	58152129	58153128	Intergenic	0.837227	15.38	ENSG00000267400	0	0	0
chr1	42671378	42672377	intron	0.836869	33.18	ENSG00000197273	0	0	0
chr19	54483837	54484836	intron	0.833	7.84	ENSG00000130433	-0.474204	0.0689039	0.0957179
chr14	92210370	92211369	Intergenic	0.832906	22.47	ENSG00000133962	-0.201397	0.211207	0.242848
chr2	153262336	153263335	intron	0.832906	4.37	ENSG00000157827	-0.0353875	8.14051	8.34265
chr1	193406882	193407919	Intergenic	0.832214	36.04	ENSG00000232077		0.0115857	0
chr13	111024094	111025093	intron	0.831032	88.68	ENSG00000187498	-0.0200846	57.3623	58.1664
chr10	9065730	9066729	Intergenic	0.830903	43.59	ENSG00000223808	-0.919982	0.0162376	0.0307231
chr20	62485091	62486223	Intergenic	0.830225	39.82	ENSG00000183260	0.452183	3.40834	2.49128
chr20	11368061	11369060	Intergenic	0.829756	9.65	ENSG00000235544	0	0	0
chr15	91969340	91970339	Intergenic	0.828931	33.33	ENSG00000258551	-0.825973	0.032373	0.0573886
chrX	3011768	3012767	intron	0.825321	33.03	ENSG00000239228	0	0	0
chr6	132436595	132437594	Intergenic	0.819428	25.64	ENSG00000265669	0	0	0
chr3	177695234	177696233	Intergenic	0.818674	37.1	ENSG00000270321	0	0	0
chr12	92932705	92933838	Intergenic	0.818537	78.88	ENSG00000238865	0	0	0
chr6	12602645	12603644	Intergenic	0.817573	9.05	ENSG00000234015	0.0712837	0.514261	0.489469
chr1	110305682	110306710	intron	0.816443	18.1	ENSG00000134202	-0.0153511	3.81278	3.85356
chr4	186795806	186796885	intron	0.816237	87.17	ENSG00000154556	0.0586763	28.1191	26.9984
chr1	157124411	157125410	Intergenic	0.815626	24.28	ENSG00000117036	0.265768	6.52486	5.42709
chr12	80547814	80548856	Intergenic	0.814262	47.05	ENSG00000230291	0.310546	0.514599	0.41494
chr13	40350994	40351993	intron	0.814156	9.35	ENSG00000200526	0	0	0
chr10	127661733	127662732	promoter-TSS	0.813333	9.65	ENSG00000233409	0	0	0
chr8	56449670	56450760	Intergenic	0.812668	33.93	ENSG00000270907		0.00132987	0
chr5	57445031	57446030	Intergenic	0.812093	64.25	ENSG00000248271	0.317383	0.182571	0.146518
chr9	93822631	93823860	Intergenic	0.811769	81.59	ENSG00000230537		0	0.0127902
chr13	111032528	111033692	intron	0.810397	17.19	ENSG00000187498	-0.0200846	57.3623	58.1664
chr19	50708379	50709378	intron	0.805864	10.86	ENSG00000105357	-0.0389581	2.68777	2.76133
chr3	189788234	189789233	intron	0.804487	35.59	ENSG00000090530	-0.0297056	539.332	550.552
chr2	232270386	232271385	Intergenic	0.803659	25.49	ENSG00000156966	-0.107899	0.870804	0.938428
chr4	79548137	79549136	Intergenic	0.801928	7.39	ENSG00000200998	0	0	0
chr20	13472341	13473573	intron	0.8018	38.16	ENSG00000089123	-0.0940384	4.80142	5.12482
chr10	127822683	127823682	intron	0.80122	62.89	ENSG00000213170	-1.12312	0.0171374	0.0373282
chr5	150591472	150592471	intron	0.800896	6.33	ENSG00000196743	-0.0329459	33.701	34.4795
chr9	38319045	38320044	Intergenic	0.800734	33.63	ENSG00000223716	0	0	0
chr6	126234926	126235925	intron	0.800449	16.74	ENSG00000232131	0	0	0
chr1	209865211	209866281	intron	0.800034	10.56	ENSG00000117594	-0.0482687	1.49781	1.54877
chr8	40030911	40032219	Intergenic	0.799724	9.35	ENSG00000254143		0.0204793	0
chrX	29553468	29554467	intron	0.798607	10.71	ENSG00000201356	0	0	0
chr7	80928166	80929306	Intergenic	0.798349	137.85	ENSG00000223514	0	0	0
chr12	66205420	66206445	intron	0.797331	51.13	ENSG00000149948	0.240055	69.7602	59.0669
chr7	41142566	41143565	intron	0.794852	89.43	ENSG00000224017		0.014063	0
chr6	1890176	1891323	intron	0.793719	44.04	ENSG00000054598	0.102522	6.28164	5.85074
chrX	140227384	140228383	Intergenic	0.791563	21.87	ENSG00000214925	0	0	0
chr1	68166170	68167169	TTS	0.791141	13.27	ENSG00000232284	0.029259	0.457374	0.448191
chr18	57514436	57515435	Intergenic	0.791049	47.96	ENSG00000267669	0	0	0
chr21	23908532	23909531	Intergenic	0.789988	18.25	ENSG00000234034	0	0	0
chr15	45737516	45738515	Intergenic	0.788861	97.43	ENSG00000166920	0.359178	70.3761	54.8658
chr22	32272000	32272999	intron	0.786806	9.35	ENSG00000227813	0	0	0
chr14	22335345	22336344	Intergenic	0.78673	18.4	ENSG00000211788	0	0	0
chr6	2810307	2811306	Intergenic	0.785427	35.89	ENSG00000021355	0.0598336	32.1237	30.8187
chr6	167053645	167054644	intron	0.784869	18.1	ENSG00000231654	0	0	0
chr6	132430857	132431856	Intergenic	0.782998	18.25	ENSG00000265669	0	0	0
chr1	4016178	4017177	Intergenic	0.782315	18.1	ENSG00000226374	0	0	0
chr10	81092983	81093982	Intergenic	0.780252	16.29	ENSG00000108179	0.295929	80.7941	65.8107
chr7	76566766	76567765	Intergenic	0.779965	22.17	ENSG00000135205	0.770739	1.39527	0.817792
chr16	50775822	50776821	intron	0.779738	20.21	ENSG00000083799	0.274038	8.55584	7.0757
chr1	77525570	77526581	TTS	0.779634	18.55	ENSG00000230498	-0.158979	0.278117	0.310517
chr5	159890322	159891321	Intergenic	0.778763	40.27	ENSG00000253522	3.48279	15.1835	1.35815
chr4	189365186	189366291	Intergenic	0.778363	8.29	ENSG00000249378		0.0292893	0
chr14	94808095	94809094	Intergenic	0.775695	51.88	ENSG00000170099	2.64203	0.104374	0.016721
chr7	81247281	81248406	Intergenic	0.77532	16.74	ENSG00000230196	0	0	0
chr21	45201778	45202831	Intergenic	0.773185	65	ENSG00000234030		0.0313351	0
chr10	135088930	135090032	intron	0.772381	9.05	ENSG00000151651	0.420525	40.5642	30.3076
chr3	176862707	176863706	intron	0.772281	32.43	ENSG00000177565	0.0452696	32.3018	31.3039
chr8	39976468	39977505	Intergenic	0.770231	123.07	ENSG00000253665	0	0	0
chr1	27985628	27986627	Intergenic	0.768843	4.52	ENSG00000233975	0	0	0
chr1	115865861	115866860	intron	0.7674	15.38	ENSG00000228035		0.00275437	0
chr3	52347357	52348363	Intergenic	0.767128	15.99	ENSG00000114841	-1.67887	0.320278	1.02546
chr7	3955631	3956630	intron	0.7664	11.16	ENSG00000236510	-0.0605886	0.0541336	0.0564555
chr17	1480487	1481486	intron	0.766246	96.67	ENSG00000174238	0.0032286	117.723	117.46
chr14	35810669	35811668	Intergenic	0.762748	16.44	ENSG00000258860	0	0	0
chr3	10206207	10207213	exon	0.759504	6.18	ENSG00000134070	1.27092	9.93838	4.11841
chr6	138049751	138050844	Intergenic	0.758574	130	ENSG00000234956	0.918334	0.512198	0.271014
chr1	83946478	83947477	Intergenic	0.758421	14.33	ENSG00000231364	0.972241	0.0288469	0.0147037
chr1	30056628	30057627	Intergenic	0.757831	49.32	ENSG00000221126	0	0	0
chr6	116408407	116409406	Intergenic	0.757677	10.56	ENSG00000178425	0.024221	28.5559	28.0805
chr5	16539363	16540362	intron	0.757301	55.35	ENSG00000246214	-0.148887	0.103641	0.114908
chr20	13505474	13506473	intron	0.757273	1.51	ENSG00000089123	-0.0940384	4.80142	5.12482
chr8	29275883	29276882	Intergenic	0.757194	7.09	ENSG00000260253	-0.691352	0.0682832	0.110263
chr9	132464831	132465830	intron	0.755137	52.63	ENSG00000236024	0	0	0
chr11	35619740	35620739	Intergenic	0.754947	152.47	ENSG00000254669	-2.26412	0.0231459	0.111184
chr4	74730086	74731141	Intergenic	0.753085	13.88	ENSG00000163739	2.1594	597.206	133.684
chr3	185069546	185070572	intron	0.75284	60.78	ENSG00000073803	0.015747	24.2888	24.0251
chr15	64188290	64189289	Intergenic	0.748938	28.66	ENSG00000259351	0	0	0
chr3	170157914	170158983	Intergenic	0.748381	36.65	ENSG00000013297	0.100067	249.162	232.466
chr6	119116926	119117925	Intergenic	0.748021	21.11	ENSG00000111875	-0.125873	8.15827	8.90204
chr3	191055607	191056606	intron	0.747406	22.32	ENSG00000188958	-0.562615	0.14014	0.206978
chr2	114006516	114007515	intron	0.747234	4.52	ENSG00000125618	0.33716	0.511492	0.404896
chr12	10572955	10574188	promoter-TSS	0.746843	14.48	ENSG00000183542	-0.146575	0.0777373	0.0860504
chr12	52835539	52836538	Intergenic	0.746368	18.85	ENSG00000170454	0.347328	0.247337	0.194417
chr12	6432489	6433488	intron	0.745782	16.44	ENSG00000008323	0.362577	6.2862	4.88924
chr11	127510295	127511389	Intergenic	0.745076	34.39	ENSG00000254591	0	0	0
chrX	16570118	16571229	Intergenic	0.744604	30.31	ENSG00000239333	0	0	0
chr1	236694878	236695877	intron	0.744512	24.58	ENSG00000116977	0.0566538	66.8962	64.3202
chr2	113642350	113643349	Intergenic	0.743894	18.7	ENSG00000125571	-0.0324882	0.0983779	0.100618
chr16	396033	397032	exon	0.743075	8.6	ENSG00000103126	0.0198511	11.1879	11.0351
chr5	149160013	149161012	intron	0.742202	29.26	ENSG00000155846	-0.224794	2.35496	2.75203
chr8	48437018	48438019	intron	0.741824	77.97	ENSG00000251354	0	0	0
chr14	69940232	69941344	Intergenic	0.740133	49.47	ENSG00000175985	0.209118	0.207272	0.179304
chr5	111319572	111320638	intron	0.740063	45.55	ENSG00000134986	-0.326129	3.19299	4.00288
chr12	66290039	66291038	intron	0.739898	6.18	ENSG00000197301	0.541742	1.79649	1.23408
chr5	149939922	149940921	Intergenic	0.739898	16.89	ENSG00000239191	-0.960911	18.5387	36.0863
chr18	18580558	18581557	intron	0.737558	4.07	ENSG00000260263	0.104335	0.356353	0.331492
chr22	30710800	30711799	intron	0.737434	14.78	ENSG00000099992	0.350731	8.55334	6.70741
chr11	85827245	85828289	Intergenic	0.737284	50.67	ENSG00000238666	0	0	0
chr2	213641986	213642985	Intergenic	0.735038	5.88	ENSG00000223373		0.0170608	0
chr8	56902520	56903902	intron	0.734402	25.49	ENSG00000199405		1.80498	0
chr19	47735370	47736440	5'	0.734026	58.06	ENSG00000105327	1.70267	4.13742	1.27109
chr8	39916870	39917869	Intergenic	0.733943	27	ENSG00000253790	0	0	0
chr16	81659022	81660021	intron	0.733165	34.69	ENSG00000260229	0.278643	0.367545	0.302992
chr1	9223282	9224419	Intergenic	0.730058	41.17	ENSG00000234546	-0.329544	0.586901	0.73751
chr5	115276571	115277571	Intergenic	0.73005	20.81	ENSG00000172901	1.07921	0.162803	0.0770529
chr3	10230414	10231413	intron	0.729768	16.89	ENSG00000134070	1.27092	9.93838	4.11841
chr16	31008618	31009682	intron	0.728939	13.57	ENSG00000268863	0.244515	0.633816	0.535004
chr7	76236281	76237280	intron	0.728698	3.62	ENSG00000135205	0.770739	1.39527	0.817792
chr17	58168837	58169836	Intergenic	0.727562	23.98	ENSG00000261040	0.0809588	3.86461	3.65372
chr15	57878666	57879665	Intergenic	0.726638	12.82	ENSG00000137878	-0.273533	5.41815	6.54927
chr15	100243266	100244265	intron	0.726185	6.18	ENSG00000183060	-0.0666601	2.86815	3.00379
chr4	159080836	159081835	intron	0.725264	4.22	ENSG00000164124	-0.0692448	6.79865	7.13292
chr1	209091661	209092660	Intergenic	0.72503	4.07	ENSG00000236950	0	0	0
chr4	11598987	11600055	Intergenic	0.724956	31.97	ENSG00000249631	0.862929	1.2817	0.704723
chr16	48656683	48657879	Intergenic	0.724176	13.12	ENSG00000220993	0	0	0
chr7	38784466	38785465	intron	0.724156	12.07	ENSG00000164556		0	0.0047919
chr19	18026437	18027436	Intergenic	0.723778	41.47	ENSG00000007080	-0.0538105	56.6867	58.8409
chr15	42302816	42303815	intron	0.723177	21.87	ENSG00000246740	-1.04569	0.0124246	0.0256486
chr9	117050295	117051348	intron	0.722712	31.22	ENSG00000229314	0	0	0
chr2	113968017	113969135	Intergenic	0.721832	24.13	ENSG00000189223	0.559644	0.506832	0.34387
chr4	74605937	74607141	intron	0.721823	97.28	ENSG00000169429	3.90843	500.302	33.3178
chr4	81942736	81943735	Intergenic	0.721473	18.25	ENSG00000152785	0.436384	0.0632331	0.0467283
chr14	96734257	96735344	Intergenic	0.719568	20.81	ENSG00000258793	-0.0371761	0.177361	0.181991
chr5	131429889	131430921	Intergenic	0.719388	152.47	ENSG00000253067	0	0	0
chr19	39390341	39391378	promoter-TSS	0.718056	26.24	ENSG00000068903	-0.00274539	10.8907	10.9115
chr4	154597636	154598691	Intergenic	0.717532	57.61	ENSG00000137462	0.178255	6.50277	5.74696
chr18	20254109	20255185	Intergenic	0.717527	17.34	ENSG00000101773	0.197632	50.7843	44.2829
chrX	46115734	46116733	Intergenic	0.717423	1.81	ENSG00000229145	0.00212643	0.100559	0.10041
chr9	25964345	25965344	Intergenic	0.717157	2.11	ENSG00000270683	0	0	0
chr2	38665817	38666835	Intergenic	0.715078	98.94	ENSG00000213553	0.0273126	235.614	231.195
chr9	21796581	21797580	Intergenic	0.715034	11.46	ENSG00000099810	-0.00717006	45.8364	46.0648
chr1	36500211	36501210	intron	0.713893	3.77	ENSG00000271554	-0.492048	0.128057	0.180104
chr20	43733324	43734323	Intergenic	0.712802	22.17	ENSG00000124134	-0.275694	0.0169109	0.0204719
chr5	139726422	139727421	promoter-TSS	0.712648	6.49	ENSG00000113070	1.98012	43.3859	10.997
chr19	43553637	43554636	Intergenic	0.711279	7.09	ENSG00000236932	0.707781	0.155701	0.0953297
chr1	187996420	187997419	Intergenic	0.709805	42.38	ENSG00000150732	0	0	0
chr14	20762719	20763718	intron	0.709787	18.4	ENSG00000136319	-0.114645	9.72126	10.5253
chr12	8294089	8295195	Intergenic	0.709368	52.94	ENSG00000111729	-0.0638736	0.372018	0.388858
chr5	158394181	158395288	intron	0.709011	75.71	ENSG00000164330	-1.07293	0.0560279	0.117866
chr6	163647445	163648444	intron	0.70706	25.34	ENSG00000185345	0.523369	0.0473372	0.0329347
chr14	70183282	70184319	Intergenic	0.707036	36.5	ENSG00000100650	0.14749	563.448	508.692
chr3	157077423	157078495	intron	0.70646	73.9	ENSG00000197415	-0.0901579	16.5303	17.5962
chr3	157057596	157058595	intron	0.702372	29.56	ENSG00000163661	1.76029	35.6467	10.5225
chr6	158705095	158706100	Intergenic	0.701115	3.77	ENSG00000236537	0.0667176	3.69615	3.52911
chr4	189359036	189360091	Intergenic	0.701078	6.94	ENSG00000249378		0.0292893	0
chr3	157154846	157155845	exon	0.700598	16.29	ENSG00000197415	-0.0901579	16.5303	17.5962
chr8	79716606	79717605	intron	0.699801	43.13	ENSG00000104432	0.66929	2.48028	1.55964
chr19	48613529	48614540	promoter-TSS	0.698632	11.61	ENSG00000105499	0.142679	1.53795	1.39313
chr3	180184796	180185795	Intergenic	0.697923	12.07	ENSG00000241696	0	0	0
chr3	17064296	17065363	intron	0.697886	30.92	ENSG00000226441	0	0	0
chr1	109028670	109029669	Intergenic	0.696915	31.07	ENSG00000238118	0	0	0
chr20	43987093	43988273	Intergenic	0.696135	60.48	ENSG00000204070	0.161327	24.4222	21.8384
chr5	150465881	150467038	intron	0.695945	42.23	ENSG00000145901	0.468312	155.177	112.163
chr2	238131586	238132585	Intergenic	0.695938	13.27	ENSG00000224132	0	0	0
chr2	102246717	102247785	Intergenic	0.695451	94.11	ENSG00000071054	0.0424601	138.414	134.4
chr2	227637436	227638435	intron	0.693508	4.22	ENSG00000169047	-0.0197753	27.6538	28.0355
chr4	169514442	169515635	intron	0.693458	23.23	ENSG00000129116	0.0194617	114.354	112.822
chr8	17206011	17207132	exon	0.691338	36.65	ENSG00000003987	0.340916	0.179758	0.141926
chr12	112212089	112213088	intron	0.690646	9.65	ENSG00000257877	0	0	0
chr7	3002416	3003415	intron	0.690611	31.07	ENSG00000201794	0	0	0
chr4	89713337	89714505	intron	0.688789	30.92	ENSG00000248019	-0.412017	0.109873	0.146191
chr3	4763796	4764795	intron	0.687778	7.09	ENSG00000235947	0.459296	0.138364	0.100638
chr18	48761708	48762758	Intergenic	0.68741	7.84	ENSG00000176624	0.0648714	10.2089	9.76
chr16	57337692	57338782	Intergenic	0.686113	58.06	ENSG00000260965	0	0	0
chr3	171542784	171543783	Intergenic	0.684447	58.67	ENSG00000075651	-0.230334	9.44217	11.0767
chr12	14994455	14995619	intron	0.683901	44.19	ENSG00000182993	-0.262287	2.06201	2.47313
chrX	73244901	73245900	intron	0.683441	22.47	ENSG00000203397	0	0	0
chr19	42695829	42696828	Intergenic	0.68326	9.65	ENSG00000028277	-0.260989	7.4706	8.95202
chr5	172443313	172444312	intron	0.682912	21.27	ENSG00000113732	0.0253841	184.434	181.217
chr8	48905983	48907002	Intergenic	0.682905	46.15	ENSG00000169139	-0.0378377	65.1277	66.8584
chr3	172409796	172410795	intron	0.681998	6.03	ENSG00000144959	0.0402162	68.1802	66.3059
chr4	74681936	74682935	Intergenic	0.681959	21.42	ENSG00000124875	0.639644	13.1273	8.42605
chr11	75400768	75401767	Intergenic	0.681279	80.23	ENSG00000171533	0.305454	0.0603841	0.0488621
chr3	172574984	172575983	Intergenic	0.680973	32.27	ENSG00000237501	-0.125755	0.261234	0.285027
chr6	89744976	89745975	Intergenic	0.680621	94.71	ENSG00000220960	-1.74491	0.0241407	0.0809134
chr1	21912828	21913827	Intergenic	0.679587	17.49	ENSG00000233431	0	0	0
chr17	26132484	26133483	Intergenic	0.679587	19.76	ENSG00000266527	-0.0277588	0.00370083	0.00377272
chr6	20952695	20953694	intron	0.677505	6.79	ENSG00000225832	0	0	0
chr5	159408671	159409721	Intergenic	0.676843	107.68	ENSG00000248626	-0.893636	0.0605388	0.112472
chr12	106620970	106621969	Intergenic	0.676799	19.76	ENSG00000166046	-0.391747	2.70989	3.55533
chr14	61899995	61900994	intron	0.676561	8.45	ENSG00000182107	0.0442987	25.7077	24.9303
chr6	158447245	158448250	intron	0.674948	18.1	ENSG00000078269	0.0693259	14.2753	13.6056
chr11	63202368	63203367	intron	0.674538	45.55	ENSG00000168004		0	0.00324716
chr6	16683924	16685175	intron	0.67451	35.89	ENSG00000124788	0.109809	4.71809	4.3723
chr11	108886340	108887339	Intergenic	0.67343	2.87	ENSG00000201243	0	0	0
chr12	19534657	19535656	Intergenic	0.672546	14.78	ENSG00000240993	0	0	0
chr3	71136546	71137545	intron	0.671946	30.92	ENSG00000244203		0	0.0427973
chr4	38340435	38341441	Intergenic	0.669523	56.25	ENSG00000248227	0	0	0
chr4	183896786	183897877	Intergenic	0.669314	107.08	ENSG00000250636	0	0	0
chr12	8261689	8262688	Intergenic	0.668986	1.96	ENSG00000111729	-0.0638736	0.372018	0.388858
chr17	40439911	40440910	5'	0.668794	20.06	ENSG00000126561	0.133539	2.84621	2.59459
chr7	117075416	117076415	Intergenic	0.668716	102.86	ENSG00000214684	0	0	0
chr4	26089778	26090934	Intergenic	0.668138	47.36	ENSG00000248452	-1.07287	0.00989026	0.0208053
chr15	75400740	75401739	Intergenic	0.667892	28.81	ENSG00000252722	0	0	0
chr8	54819083	54820082	intron	0.666904	5.13	ENSG00000244159	-0.190744	0.946623	1.08043
chr15	71145590	71146707	promoter-TSS	0.664495	19.46	ENSG00000137821	0.152507	6.01058	5.40763
chr21	39003478	39004487	intron	0.663815	78.58	ENSG00000267937	-0.483332	0.771205	1.07812
chr1	241775161	241776160	intron	0.661198	4.22	ENSG00000117009	0.58009	1.96535	1.31466
chr2	139190936	139191935	Intergenic	0.660847	14.03	ENSG00000230569	0.196503	0.0123232	0.010754
chr4	21453286	21454285	intron	0.660011	3.02	ENSG00000185774	0.24397	0.45287	0.382412
chr3	192675264	192676295	Intergenic	0.659888	52.03	ENSG00000180611	0.178248	9.89373	8.74384
chr6	23350151	23351275	Intergenic	0.659811	10.71	ENSG00000235743	0	0	0
chr11	19798340	19799394	intron	0.659421	21.57	ENSG00000200687	0	0	0
chr1	116137570	116138631	Intergenic	0.657475	6.64	ENSG00000239984	0	0	0
chr21	40182926	40183925	intron	0.656526	17.49	ENSG00000157557	0.206952	29.0957	25.2076
chr5	88609281	88610280	Intergenic	0.656416	19.15	ENSG00000081189	-0.385666	2.01661	2.63463
chrX	103437718	103438717	3'	0.655894	12.82	ENSG00000123575	-0.075483	23.4401	24.6992
chr4	177357378	177358685	Intergenic	0.654556	49.02	ENSG00000248980	-0.381966	0.935299	1.2188
chr5	60711422	60712421	intron	0.654434	11.16	ENSG00000130449	0.113755	6.35268	5.87101
chr19	44205329	44206540	Intergenic	0.653457	12.52	ENSG00000124449	-0.0277595	0.0052381	0.00533986
chr12	32027820	32028819	Intergenic	0.652581	19.76	ENSG00000255760	0	0	0
chr1	110365820	110366819	Intergenic	0.652552	3.92	ENSG00000228420	0	0	0
chr14	36598395	36599394	intron	0.652528	29.41	ENSG00000259104	0.378909	0.436726	0.33585
chr12	12425970	12426969	Intergenic	0.652372	10.71	ENSG00000070018	0.0687183	11.1548	10.6359
chr2	135831300	135832299	intron	0.652003	12.52	ENSG00000115839	0.0644386	28.9336	27.6697
chr5	95360472	95362029	Intergenic	0.651951	28.96	ENSG00000153113	0.0204	190.497	187.744
chr8	39821120	39822119	intron	0.651839	50.37	ENSG00000253790	0	0	0
chr6	11236695	11237694	intron	0.650909	7.99	ENSG00000247925	0	0	0
chr1	200530911	200531910	intron	0.649706	22.02	ENSG00000118193	0.0427079	9.49741	9.22038
chr4	74982587	74983586	Intergenic	0.648765	72.39	ENSG00000163738	-0.0449194	8.50656	8.77559
chr5	142412972	142414029	intron	0.648166	63.95	ENSG00000226272		0.0145616	0
chr8	101508006	101509005	Intergenic	0.648038	23.68	ENSG00000253666	0.160108	0.290811	0.260264
chrX	107779268	107780267	intron	0.647416	3.62	ENSG00000188153	-0.0732798	68.992	72.5869
chrX	70882851	70883850	intron	0.647296	7.09	ENSG00000237265	1.53212	0.301238	0.104159
chr7	6407120	6408165	Intergenic	0.645063	61.53	ENSG00000136238	0.0414264	374.214	363.621
chr3	71463034	71464033	intron	0.64478	18.25	ENSG00000114861	0.269308	6.74635	5.59757
chr22	31232288	31233287	intron	0.643856	4.52	ENSG00000235989	1.50401	0.117374	0.0413827
chr10	98783580	98784579	intron	0.64356	22.92	ENSG00000231398	0	0	0
chr15	65277416	65278519	intron	0.643257	13.42	ENSG00000090487	-0.0244513	42.3053	43.0284
chr4	169361586	169362585	intron	0.642876	6.64	ENSG00000129116	0.0194617	114.354	112.822
chr8	23075720	23076960	intron	0.64278	19.3	ENSG00000104689	0.236191	35.8141	30.4056
chr7	92672793	92673880	Intergenic	0.642241	91.85	ENSG00000266794	0	0	0
chrX	10957234	10958233	Intergenic	0.642078	3.77	ENSG00000101871	0.146515	31.6348	28.5798
chr9	105099181	105100180	Intergenic	0.641424	28.96	ENSG00000222117	0	0	0
chr14	52217969	52218968	Intergenic	0.641379	46.6	ENSG00000258423	0.196503	0.00970178	0.00846639
chr14	27897070	27898069	Intergenic	0.640984	17.8	ENSG00000258548	-0.280226	0.158715	0.192741
chr2	56913966	56915149	Intergenic	0.63951	25.19	ENSG00000231570	0	0	0
chr21	38998988	38999987	intron	0.639022	6.79	ENSG00000267937	-0.483332	0.771205	1.07812
chr2	100483950	100484949	intron	0.638085	65.76	ENSG00000144218	0.324194	0.436296	0.348489
chr5	96228713	96229712	intron	0.637628	6.03	ENSG00000113441	-0.049743	22.7095	23.5062
chr3	172353046	172354045	intron	0.63625	27.6	ENSG00000231384	0	0	0
chr6	3209407	3210406	Intergenic	0.635336	55.95	ENSG00000230269	0	0	0
chr5	150581763	150582762	intron	0.635276	26.09	ENSG00000196743	-0.0329459	33.701	34.4795
chr12	56837064	56838106	intron	0.634582	56.56	ENSG00000111602	0.0268226	45.7817	44.9384
chr12	66486020	66487019	Intergenic	0.633782	40.87	ENSG00000251857	0	0	0
chr7	127657231	127658230	intron	0.633468	12.52	ENSG00000128594	0.182692	1.69824	1.49625
chr9	3497131	3498198	intron	0.633254	14.48	ENSG00000080298	0.265639	1.46936	1.22226
chr1	65382120	65383431	intron	0.633023	12.52	ENSG00000162434	0.126457	22.5188	20.629
chr19	43739629	43740715	intron	0.632998	9.05	ENSG00000243137	0.177045	2.94385	2.60388
chr3	10234846	10235922	intron	0.632906	19.15	ENSG00000134070	1.27092	9.93838	4.11841
chr18	9094358	9095396	Intergenic	0.632859	50.22	ENSG00000101745	0.629751	7.07733	4.57399
chr4	111461786	111462841	intron	0.632611	11.76	ENSG00000199894	0	0	0
chr8	19535506	19536505	intron	0.631843	15.08	ENSG00000147408	0.0649784	0.503916	0.481723
chr7	89213007	89214045	Intergenic	0.631666	96.07	ENSG00000227863	0	0	0
chr2	145867936	145868935	Intergenic	0.630907	9.5	ENSG00000234940	0	0	0
chr4	157242942	157243985	Intergenic	0.629652	36.35	ENSG00000221189	0	0	0
chr15	56344140	56345188	Intergenic	0.629635	14.93	ENSG00000261333		0.406896	0
chr19	10370479	10371665	TTS	0.628721	31.97	ENSG00000090339	1.06674	52.3792	25.0057
chr5	90353889	90355180	intron	0.628511	126.69	ENSG00000176018	0.128993	11.1656	10.2106
chr2	41937172	41938171	Intergenic	0.626542	59.12	ENSG00000252281	0	0	0
chr8	8640856	8641855	TTS	0.626256	3.47	ENSG00000254367		0	0.12123
chr1	153521678	153522680	promoter-TSS	0.625773	13.88	ENSG00000188015	0.107422	4.33742	4.02619
chr7	77038707	77039780	intron	0.625741	41.02	ENSG00000127951	0.360214	0.00702336	0.00547154
chr14	39960707	39961794	Intergenic	0.625737	37.7	ENSG00000258526	0.0335368	0.256683	0.250785
chr16	19554683	19555741	intron	0.624293	51.58	ENSG00000103544	-0.397503	1.75252	2.30846
chr8	106645256	106646317	intron	0.623404	97.73	ENSG00000201627	0	0	0
chr13	110304694	110305693	Intergenic	0.623281	26.09	ENSG00000234854	0	0	0
chr12	10332357	10333404	intron	0.623087	112.81	ENSG00000173391	0.861879	99.4928	54.7445
chr9	101449281	101450280	intron	0.622206	23.98	ENSG00000136928	-0.38846	0.00274319	0.00359082
chr2	143737436	143738566	intron	0.621913	16.59	ENSG00000221169	0	0	0
chr6	31527595	31528700	Intergenic	0.621903	27	ENSG00000198563	-0.000382545	348.412	348.505
chr6	35133224	35134375	Intergenic	0.621897	55.2	ENSG00000124678	0.235881	0.0349677	0.0296934
chr1	208063320	208064481	intron	0.621104	43.59	ENSG00000226202	0	0	0
chr1	169665370	169666369	intron	0.619243	9.65	ENSG00000000460	0.142933	9.65765	8.7467
chr1	186978882	186980027	Intergenic	0.618291	45.24	ENSG00000236030	0	0	0
chr2	97171317	97172385	promoter-TSS	0.617967	19.91	ENSG00000163121	1.24956	7.72737	3.24995
chr15	85707990	85709007	Intergenic	0.616508	79.63	ENSG00000259270	0	0	0
chr11	102828511	102829510	Intergenic	0.61507	182.64	ENSG00000137745	1.9986	197.394	49.3962
chr14	35860019	35861018	Intergenic	0.615015	24.13	ENSG00000240023		0.00892792	0
chr6	57138895	57139894	Intergenic	0.615015	22.47	ENSG00000146143	-0.0290192	24.3509	24.8457
chr7	76068481	76069480	intron	0.614035	80.54	ENSG00000146700	-0.155365	1.23672	1.37734
chr9	3732531	3733530	Intergenic	0.613118	4.98	ENSG00000226669		0	0.0447025
chr4	98428806	98429805	Intergenic	0.611944	41.78	ENSG00000214904	0	0	0
chr16	57680672	57681671	intron	0.611917	6.03	ENSG00000261633	0	0	0
chr1	183108132	183109219	intron	0.611608	77.67	ENSG00000224468	0.0892233	1.49234	1.40285
chrX	73461868	73462867	intron	0.611493	2.56	ENSG00000199168	0	0	0
chr12	104874457	104875456	intron	0.611008	9.2	ENSG00000171310	-0.118177	16.3976	17.7974
chr20	48924974	48925990	intron	0.609894	56.25	ENSG00000233077	0.279823	0.158835	0.130831
chr6	22892374	22893425	Intergenic	0.609735	12.52	ENSG00000233358	0	0	0
chr14	73694669	73695668	Intergenic	0.609645	37.1	ENSG00000100767	-0.0338596	1.74019	1.78152
chr1	185941020	185942019	intron	0.6094	10.71	ENSG00000224691	0.434509	0.606327	0.448649
chr14	69931220	69932231	Intergenic	0.608609	40.72	ENSG00000100632	-0.0318376	379.728	388.201
chr10	123165880	123167079	Intergenic	0.608311	43.43	ENSG00000222979	0	0	0
chr1	193377761	193378881	Intergenic	0.607386	67.72	ENSG00000232077		0.0115857	0
chr2	174024222	174025221	intron	0.607124	18.7	ENSG00000091436	-0.0185919	33.0413	33.4698
chr21	18791138	18792277	Intergenic	0.606855	11.16	ENSG00000252462	0	0	0
chr3	185646657	185647656	intron	0.606297	13.88	ENSG00000136527	0.0403	273.995	266.318
chr7	41278031	41279030	Intergenic	0.605264	17.04	ENSG00000224017		0.014063	0
chr6	44032026	44033025	Intergenic	0.604859	50.67	ENSG00000237686	0.120589	2.98003	2.74106
chr17	46132927	46133986	intron	0.604232	5.73	ENSG00000266341	0.0953978	167.207	156.508
chr9	138022231	138023230	Intergenic	0.603789	12.82	ENSG00000130558	0.983976	0.0225472	0.0113995
chr3	22516223	22517445	Intergenic	0.603627	45.24	ENSG00000132967	-0.0819852	204.355	216.304
chr15	45361320	45362339	intron	0.603492	76.46	ENSG00000252171	0	0	0
chr2	69163367	69164521	Intergenic	0.603153	26.69	ENSG00000183607	0	0	0
chr4	96188035	96189191	intron	0.601812	31.82	ENSG00000271474	0	0	0
chr6	143122926	143123925	intron	0.601464	23.23	ENSG00000233138	1.71688	0.153968	0.046838
chr1	90320570	90321569	intron	0.600946	19.76	ENSG00000226394	0	0	0
chr7	76240831	76241869	intron	0.600367	6.03	ENSG00000135205	0.770739	1.39527	0.817792
chr3	113190296	113191295	intron	0.598703	27.75	ENSG00000206530	-0.490122	3.17715	4.46251
chr10	101445030	101446044	intron	0.597749	10.26	ENSG00000119929	-0.0478936	9.85034	10.1828
chr1	110438870	110439869	Intergenic	0.597499	1.51	ENSG00000261055	-0.960911	0.00846649	0.0164803
chr13	97302394	97303393	intron	0.597198	18.25	ENSG00000235137	0	0	0
chr5	9059563	9060562	intron	0.597045	41.02	ENSG00000248537	0	0	0
chr13	45058528	45059527	intron	0.596571	4.83	ENSG00000225727		0.0486564	0
chr6	42012445	42013500	intron	0.596456	23.23	ENSG00000112576	0.097517	45.3762	42.4105
chr7	19929146	19930145	Intergenic	0.596249	14.48	ENSG00000213860	-0.00289894	113.545	113.773
chr3	136612296	136613422	intron	0.596238	48.26	ENSG00000158092	-0.021972	40.7249	41.3499
chr8	56831506	56832505	intron	0.59438	9.05	ENSG00000216204	0	0	0
chr14	68411395	68412394	intron	0.593822	5.13	ENSG00000182185	-0.00496227	30.3797	30.4844
chr7	117719807	117720930	Intergenic	0.593786	15.68	ENSG00000234826	0	0	0
chr14	76025719	76026718	Intergenic	0.593245	13.72	ENSG00000119650	0.00879051	13.57	13.4876
chr10	13141935	13142944	promoter-TSS	0.593054	11.01	ENSG00000151468	-1.25814	0.0139182	0.0332904
chr5	175009763	175010762	Intergenic	0.592941	15.84	ENSG00000222111	0	0	0
chr5	92131372	92132371	Intergenic	0.592874	35.44	ENSG00000248588	2.68347	0.113238	0.0176273
chr6	46922795	46923794	promoter-TSS	0.592122	46.75	ENSG00000069122	0.0918173	1.72345	1.61719
chr6	113970695	113971694	Intergenic	0.591438	14.03	ENSG00000230943	0.1872	2.52742	2.21985
chr16	15583122	15584121	intron	0.591322	19.46	ENSG00000156968	-0.0769529	1.60526	1.6932
chr15	88295308	88296363	Intergenic	0.590978	27.15	ENSG00000207150	0	0	0
chr10	90041435	90042434	intron	0.590758	5.28	ENSG00000227905	0	0	0
chr6	27746257	27747256	Intergenic	0.590571	21.11	ENSG00000218069		0	0.143818
chr14	51750582	51751594	Intergenic	0.590325	5.88	ENSG00000201820	-0.378515	143.917	187.093
chr8	55466706	55467705	Intergenic	0.590267	9.05	ENSG00000254142	0.569634	0.645479	0.434916
chr1	171871361	171872360	intron	0.588443	35.74	ENSG00000180999	1.37615	0.0592877	0.0228404
chr17	53250737	53251736	Intergenic	0.587438	4.22	ENSG00000261589	-0.11613	0.061335	0.0664763
chr3	71209831	71210856	intron	0.587068	24.88	ENSG00000244203		0	0.0427973
chr5	60736030	60737071	intron	0.587068	21.11	ENSG00000213891	0.385362	0.05816	0.0445266
chr3	157135096	157136095	intron	0.586736	7.84	ENSG00000197415	-0.0901579	16.5303	17.5962
chr7	159010396	159011406	Intergenic	0.586553	30.92	ENSG00000229435	0	0	0
chr4	74584056	74585135	Intergenic	0.586494	30.31	ENSG00000228277	1.09851	0.0387742	0.0181075
chr6	90885395	90886394	intron	0.585902	41.78	ENSG00000112182	0.162174	1.75391	1.56743
chr3	107725307	107726306	Intergenic	0.584963	37.25	ENSG00000196776	0.0912955	311.272	292.185
chr11	87474690	87475689	Intergenic	0.584714	25.49	ENSG00000255183	0	0	0
chr1	36765470	36766469	intron	0.584341	9.5	ENSG00000231849		0	0.125453
chr21	45585478	45586537	Intergenic	0.584282	66.51	ENSG00000225331	-0.737243	0.0838571	0.139789
chr15	71543790	71544789	intron	0.583869	10.86	ENSG00000187720	-0.012891	10.2518	10.3438
chr4	185243786	185244785	Intergenic	0.583758	12.52	ENSG00000227765	0.87748	0.0870251	0.0473693
chr10	52122333	52123332	intron	0.583587	8.45	ENSG00000225303	0	0	0
chr14	103726532	103727619	Intergenic	0.583311	165.29	ENSG00000270938		0	0.0575006
chr1	205293978	205294977	Intergenic	0.582798	11.31	ENSG00000163545	1.46872	26.7736	9.67342
chr14	100807319	100808456	intron	0.582296	14.93	ENSG00000176473	-0.124652	4.71378	5.13917
chr18	53435297	53436478	Intergenic	0.582085	16.59	ENSG00000267325	0.194049	0.44772	0.391374
chr3	69482614	69483683	Intergenic	0.581083	30.46	ENSG00000114541	0.144686	19.1177	17.2934
chr9	4242559	4243558	intron	0.580806	2.87	ENSG00000107249	0.235037	1.72518	1.46582
chr13	61146337	61147342	intron	0.580743	55.35	ENSG00000212054	0	0	0
chr6	150724596	150725625	3'	0.580647	60.18	ENSG00000220598	0	0	0
chr14	90875570	90876569	Intergenic	0.580022	6.18	ENSG00000258424	-0.189381	2.41984	2.75928
chr8	141607820	141609010	intron	0.579438	11.91	ENSG00000123908	0.424454	53.4147	39.8004
chr3	114287523	114288633	intron	0.579245	17.8	ENSG00000239946	0	0	0
chr3	119012914	119013956	5'	0.578551	15.23	ENSG00000031081	0.0805151	0.460327	0.43534
chr17	40561261	40562260	intron	0.578285	4.22	ENSG00000221020	0	0	0
chr3	111814873	111816245	intron	0.577351	18.85	ENSG00000114529	0.323877	17.5878	14.0512
chr5	111249981	111250980	intron	0.577237	13.57	ENSG00000134986	-0.326129	3.19299	4.00288
chr10	36201930	36203029	Intergenic	0.575564	13.42	ENSG00000227313	0	0	0
chr3	81492784	81493783	Intergenic	0.575358	15.84	ENSG00000222389	0.0709177	1.80137	1.71497
chr6	12472745	12473800	Intergenic	0.575055	30.01	ENSG00000212802	-0.0251881	236.346	240.509
chr17	36008434	36009433	Intergenic	0.575	7.09	ENSG00000141141	-0.0371071	16.668	17.1023
chr1	183287178	183288177	intron	0.574236	25.79	ENSG00000233562	0	0	0
chr15	66194266	66195319	intron	0.57423	18.7	ENSG00000263512	0	0	0
chr6	17032474	17033475	Intergenic	0.573967	21.42	ENSG00000230873	0.492323	0.177572	0.126232
chr8	57232411	57233582	5'	0.573151	24.43	ENSG00000170786	0.465807	0.964823	0.698595
chr9	22147886	22148908	Intergenic	0.572924	16.29	ENSG00000147883	0.706843	5.54834	3.39924
chr16	31711742	31712782	intron	0.572921	36.2	ENSG00000260568	0	0	0
chr1	68027470	68028469	Intergenic	0.571885	3.62	ENSG00000238139	0	0	0
chr8	62764683	62765682	Intergenic	0.571228	2.56	ENSG00000254119	0	0	0
chr14	62013769	62014768	intron	0.571188	13.12	ENSG00000182107	0.0442987	25.7077	24.9303
chr7	20070481	20071480	intron	0.57111	20.66	ENSG00000213860	-0.00289894	113.545	113.773
chr1	182583828	182584827	promoter-TSS	0.57052	27.3	ENSG00000261504	0.048087	0.0765349	0.0740259
chr4	187926937	187927936	Intergenic	0.569877	29.86	ENSG00000249742		0	0.0291825
chr9	23961795	23962794	Intergenic	0.569856	31.82	ENSG00000237414	0.258205	1.74321	1.45755
chr6	163730645	163731723	non-coding	0.569471	22.17	ENSG00000185345	0.523369	0.0473372	0.0329347
chr6	155739024	155740075	intron	0.569174	20.81	ENSG00000232529	0	0	0
chr6	31913051	31914075	promoter-TSS	0.569055	77.37	ENSG00000204366	-0.106383	2.27105	2.44484
chr9	105117549	105118594	Intergenic	0.5688	53.09	ENSG00000222117	0	0	0
chr5	73528580	73529621	Intergenic	0.568458	20.81	ENSG00000222551	0	0	0
chr1	171283178	171284177	intron	0.567177	4.22	ENSG00000076258	-0.330061	0.795034	0.999411
chr14	35866882	35867894	Intergenic	0.566262	21.72	ENSG00000100906	3.11768	340.844	39.2681
chr8	43046170	43047317	intron	0.565937	49.77	ENSG00000253611	0	0	0
chr3	119871784	119872813	Intergenic	0.565928	19	ENSG00000206721	0	0	0
chr7	40879566	40880565	intron	0.56492	9.65	ENSG00000203446	1.87425	0.0182114	0.00496749
chr20	54072674	54073673	Intergenic	0.564845	22.92	ENSG00000224008	0.13272	0.290099	0.264602
chr10	24721230	24722482	intron	0.564597	49.32	ENSG00000269879	-0.00663351	0.0433508	0.0435506
chr9	82196061	82197144	intron	0.564556	77.82	ENSG00000106829	-0.103874	8.14386	8.75185
chr1	212686520	212687519	Intergenic	0.564248	23.53	ENSG00000228067	0	0	0
chr11	118016161	118017160	promoter-TSS	0.563404	15.84	ENSG00000177098	-0.725666	0.11873	0.196339
chr9	111863945	111865035	intron	0.562672	55.05	ENSG00000106771	-0.00853428	41.1905	41.4349
chr18	8217458	8218457	intron	0.561489	8.29	ENSG00000212067	0	0	0
chr7	126214466	126215469	intron	0.561479	26.54	ENSG00000227249	0	0	0
chr11	11590340	11591339	intron	0.560965	4.83	ENSG00000110328	0.0975466	22.2276	20.7743
chr18	61403797	61404935	Intergenic	0.560569	8.75	ENSG00000057149	-0.204651	0.0859231	0.0990184
chr22	43496188	43497187	Intergenic	0.56007	53.24	ENSG00000234735	0	0	0
chr5	34736281	34737280	intron	0.559657	86.27	ENSG00000039560	-0.1007	146.549	157.143
chr8	75193361	75194455	intron	0.559393	34.24	ENSG00000104381	-0.347828	9.4617	12.0414
chr15	101233516	101234588	Intergenic	0.559227	39.06	ENSG00000259579	0	0	0
chr4	161101037	161102036	Intergenic	0.559057	10.1	ENSG00000250997	0	0	0
chr20	33002293	33003335	intron	0.55877	18.85	ENSG00000078747	0.0125528	70.881	70.2669
chr6	168408051	168409175	Intergenic	0.558531	82.95	ENSG00000125337	-1.46715	0.0328204	0.0907406
chr2	17603036	17604035	Intergenic	0.558458	11.01	ENSG00000236348	0.147778	1.06442	0.960792
chr8	74432683	74433682	intron	0.557879	9.35	ENSG00000253273		0.025524	0
chr18	41729084	41730178	Intergenic	0.557785	23.98	ENSG00000202060	0	0	0
chr8	39956570	39957610	Intergenic	0.557218	32.73	ENSG00000253381	0	0	0
chr10	114148795	114149829	intron	0.556797	63.04	ENSG00000197142	-0.125161	1.98486	2.16475
chrX	102879401	102880400	Intergenic	0.556586	10.86	ENSG00000224031	1.49262	0.14225	0.0505508
chr19	45194816	45195978	Intergenic	0.5561	20.36	ENSG00000224366	0	0	0
chr2	64834200	64835415	intron	0.556024	31.07	ENSG00000233694	0.588839	0.0229901	0.0152856
chr22	32048800	32049814	Intergenic	0.555862	72.39	ENSG00000184708	-0.0384636	17.2641	17.7306
chr8	124540703	124541819	intron	0.555728	44.34	ENSG00000156804	0.384651	11.8445	9.07244
chr5	86344530	86345562	Intergenic	0.555089	116.73	ENSG00000249061	0	0	0
chr8	131286533	131287532	intron	0.554285	8.75	ENSG00000153317	0.0931759	75.352	70.6393
chr8	32184806	32185805	intron	0.55408	8.6	ENSG00000252261	0	0	0
chrX	101978384	101979383	intron	0.553877	9.5	ENSG00000198908	-0.536494	3.14028	4.5548
chr4	119266336	119267441	intron	0.552589	23.83	ENSG00000164099	0.150936	55.0808	49.6094
chr6	27720257	27721450	Intergenic	0.55183	13.72	ENSG00000216915	0	0	0
chr8	37424070	37425069	Intergenic	0.551651	29.71	ENSG00000254111	0	0	0
chr5	111016439	111017571	intron	0.551319	71.49	ENSG00000221310	0	0	0
chr20	10919543	10920673	Intergenic	0.550735	12.97	ENSG00000101384	0.327242	40.323	32.1398
chr9	111871345	111872344	intron	0.550322	5.43	ENSG00000106771	-0.00853428	41.1905	41.4349
chrX	63108618	63109617	Intergenic	0.549916	1.66	ENSG00000222532	0	0	0
chr12	91806739	91807738	Intergenic	0.549709	20.06	ENSG00000258100	0	0	0
chr9	74770409	74771408	intron	0.548997	5.13	ENSG00000119125	-0.0117629	61.6199	62.1243
chr5	178820313	178821312	Intergenic	0.548822	20.51	ENSG00000253617	0	0	0
chr5	68194463	68195462	Intergenic	0.548581	16.74	ENSG00000249335	0	0	0
chr1	32131528	32132527	intron	0.548375	9.5	ENSG00000084636	-0.0300416	38.117	38.919
chr7	41044881	41046219	Intergenic	0.548308	31.37	ENSG00000232458		0	0.00217563
chr3	188156934	188157933	intron	0.548051	28.35	ENSG00000145012	0.248519	23.5239	19.8015
chr9	3874745	3875748	intron	0.547967	82.95	ENSG00000228322	-1.06965	0.0627	0.131603
chr8	13733933	13734932	Intergenic	0.547033	10.26	ENSG00000254753	0	0	0
chr10	74605685	74606694	intron	0.546139	15.53	ENSG00000138315	-1.54177	0.00353097	0.0102805
chr10	111720930	111721929	intron	0.5453	11.91	ENSG00000203876	0.267627	0.0374308	0.0310932
chr12	90430139	90431138	Intergenic	0.544657	7.39	ENSG00000258290	0	0	0
chr2	178116336	178117335	intron	0.544611	7.69	ENSG00000018510	-0.0578398	20.2427	21.0707
chr8	41365506	41366505	intron	0.543972	22.47	ENSG00000253943		0	0.0134174
chr1	33470028	33471027	Intergenic	0.543845	6.79	ENSG00000236065	0.0515764	0.0596611	0.0575659
chr15	80286766	80287788	Intergenic	0.543411	58.06	ENSG00000180725	0	0	0
chr8	8745870	8746960	intron	0.543036	29.56	ENSG00000147324	0.456507	17.0918	12.4556
chr6	22887401	22888594	Intergenic	0.54303	47.66	ENSG00000233358	0	0	0
chr2	26863367	26864385	intron	0.54224	13.12	ENSG00000157884	0	0	0
chr6	45558376	45559500	Intergenic	0.542161	27.75	ENSG00000196284	-0.111921	7.08681	7.65848
chr10	49540683	49541682	intron	0.541998	3.32	ENSG00000107643	-0.0548719	43.3991	45.0816
chr5	90225280	90226421	intron	0.541995	7.24	ENSG00000176018	0.128993	11.1656	10.2106
chr16	80138172	80139171	Intergenic	0.540757	4.07	ENSG00000168589	-0.327099	0.119194	0.149527
chr7	92250496	92251542	intron	0.54052	9.65	ENSG00000237819	0.165597	2.82181	2.51581
chr7	144539220	144540330	Intergenic	0.540263	83.85	ENSG00000196511	-0.111903	3.02851	3.27276
chr8	56440656	56441817	Intergenic	0.539792	9.65	ENSG00000253151	-0.230896	0.0100693	0.0118169
chr17	17349111	17350226	Intergenic	0.538967	106.78	ENSG00000230865	0	0	0
chr14	50787445	50788444	intron	0.538479	23.38	ENSG00000125375	0.143643	21.0214	19.0292
chr3	64962846	64963913	intron	0.538437	57.76	ENSG00000163638	0.124006	0.783885	0.719321
chr5	90515022	90516088	Intergenic	0.537939	64.85	ENSG00000212930	0	0	0
chr10	3893845	3894879	Intergenic	0.537477	37.4	ENSG00000230573	0	0	0
chr12	92458239	92459238	intron	0.536951	33.33	ENSG00000239201	0	0	0
chr4	34203592	34204635	Intergenic	0.536664	17.8	ENSG00000248685	0	0	0
chrX	45683368	45684379	Intergenic	0.536305	6.49	ENSG00000231566	0.486358	1.17596	0.839432
chr12	10588270	10589269	promoter-TSS	0.536268	24.43	ENSG00000134545	0.413525	0.0973081	0.0730577
chr7	103375466	103376542	intron	0.536235	16.89	ENSG00000105821	0.0513365	86.8384	83.8027
chr18	72166984	72168107	intron	0.535724	1.96	ENSG00000133313	0.00519043	62.7349	62.5096
chr7	99296481	99297480	intron	0.535587	35.89	ENSG00000221487	0	0	0
chr9	24773999	24775094	Intergenic	0.534914	10.56	ENSG00000216088	0	0	0
chr5	139620822	139621821	intron	0.534738	8.14	ENSG00000113068	-0.0410793	102.974	105.948
chr3	190099384	190100383	Intergenic	0.53424	26.85	ENSG00000113946	0.0285216	1.50796	1.47844
chr4	154080886	154081885	intron	0.53424	18.1	ENSG00000109654	-0.0780575	2.82514	2.9822
chr22	38329462	38330461	intron	0.53313	7.24	ENSG00000100142	0.0513079	57.7132	55.6968
chr2	65103050	65104049	Intergenic	0.532907	20.51	ENSG00000234572	-2.02776	0.0043054	0.0175562
chr19	54545129	54546128	intron	0.532675	7.09	ENSG00000189068	0.786845	0.984063	0.570373
chr1	157938328	157939381	Intergenic	0.532495	7.99	ENSG00000183853	0.0770571	59.7802	56.671
chr4	74903886	74904905	promoter-TSS	0.53217	23.38	ENSG00000163734	2.85407	38.1	5.26945
chr3	59449584	59450583	Intergenic	0.532061	13.72	ENSG00000242545	0	0	0
chr15	101498464	101499463	intron	0.532014	10.71	ENSG00000154237	0.0859	3.53827	3.33374
chr8	23038683	23039682	Intergenic	0.531798	2.56	ENSG00000243265	2.46044	0.299771	0.054466
chr11	108190040	108191039	intron	0.531581	5.13	ENSG00000149308	0.0464843	7.18799	6.96008
chr20	37229074	37230140	promoter-TSS	0.531374	32.88	ENSG00000124143	0.470059	1.8464	1.33298
chr1	210068970	210069969	Intergenic	0.531252	17.34	ENSG00000143469	-0.0082452	0.16022	0.161138
chr2	37617217	37618271	Intergenic	0.53092	115.22	ENSG00000253078	0	0	0
chr13	24192144	24193143	intron	0.530875	7.54	ENSG00000127863	-0.083652	0.617901	0.654788
chr15	90057716	90058715	intron	0.53014	19.15	ENSG00000140534	0.0202823	12.2876	12.1161
chr17	73992927	73994010	intron	0.530028	41.78	ENSG00000161533	-0.0486543	15.547	16.0803
chr3	10262431	10263556	intron	0.530021	11.91	ENSG00000157014	0.0593924	15.0306	14.4244
chr4	21781686	21782755	intron	0.529922	53.39	ENSG00000185774	0.24397	0.45287	0.382412
chr2	99409686	99410766	TTS	0.529866	55.5	ENSG00000201070	0	0	0
chr16	9208683	9209729	intron	0.529126	8.9	ENSG00000260349	-0.00335002	6.38204	6.39688
chr4	103533586	103534585	intron	0.528538	6.33	ENSG00000238553	0	0	0
chr20	19894591	19895623	intron	0.52846	43.74	ENSG00000132669	0.00465031	18.5028	18.4432
chr1	9747220	9748219	intron	0.52747	31.97	ENSG00000171608	0.621298	2.98343	1.93948
chr5	55646222	55647221	Intergenic	0.527348	77.52	ENSG00000249697	0.0800183	0.0149481	0.0141416
chr4	106816556	106817635	intron	0.52734	9.05	ENSG00000138785	-0.0202287	12.6633	12.8421
chr1	169098311	169099331	intron	0.52733	29.11	ENSG00000143153	0.232841	245.198	208.653
chr4	177761436	177762555	Intergenic	0.527144	18.85	ENSG00000249458		0.0300638	0
chr12	92665520	92666645	Intergenic	0.527037	19.15	ENSG00000133639	0.664911	31.8593	20.0946
chr4	141177486	141178485	promoter-TSS	0.526723	2.11	ENSG00000153130	-0.00450753	19.6604	19.7219
chr12	7521489	7522488	exon	0.52647	4.22	ENSG00000215009	-0.93311	0.0147179	0.0281023
chr5	131438731	131439829	Intergenic	0.52604	55.35	ENSG00000253067	0	0	0
chr5	133588463	133589579	Intergenic	0.525928	17.8	ENSG00000006837	0.323305	1.35212	1.08067
chr14	65637320	65638319	Intergenic	0.525579	5.28	ENSG00000222985	0	0	0
chr6	126240151	126241244	intron	0.525471	28.66	ENSG00000232131	0	0	0
chr3	49561184	49562183	intron	0.525366	16.74	ENSG00000226913	0.49847	0.0790287	0.055941
chr7	105986270	105987330	Intergenic	0.523596	59.72	ENSG00000243438	0	0	0
chr11	65046690	65047794	intron	0.523154	136.94	ENSG00000014138	0.0314876	130.038	127.231
chr8	67367268	67368719	intron	0.523013	9.65	ENSG00000147576	0.0723192	1.23206	1.17182
chr9	34992345	34993344	intron	0.522905	4.98	ENSG00000137094	-0.144124	2.18496	2.41451
chr16	29279368	29280732	Intergenic	0.522791	27.15	ENSG00000181625	0.0228602	22.7681	22.4101
chr2	28519586	28520585	intron	0.522791	8.14	ENSG00000171174	0.00858003	0.924538	0.919056
chr1	241754882	241756019	exon	0.522634	36.35	ENSG00000117009	0.58009	1.96535	1.31466
chr11	44595990	44597944	intron	0.521982	33.93	ENSG00000085117	0.0985334	141.396	132.061
chr2	151377167	151378271	Intergenic	0.521882	55.8	ENSG00000115963	0.473677	118.586	85.3972
chr18	9073529	9074683	Intergenic	0.521168	79.18	ENSG00000101745	0.629751	7.07733	4.57399
chr13	24624194	24625193	intron	0.520947	18.1	ENSG00000182957	0.120909	9.15883	8.42254
chr13	40689994	40690993	Intergenic	0.520514	6.18	ENSG00000230710	0	0	0
chr6	14117474	14118556	5'	0.520073	19	ENSG00000112149	0.522172	11.0908	7.72275
chr21	34671232	34672277	Intergenic	0.519557	15.84	ENSG00000223799	0.199898	1.94932	1.69711
chr2	213718672	213719671	Intergenic	0.519478	5.73	ENSG00000223373		0.0170608	0
chr2	151427286	151428285	intron	0.518993	8.45	ENSG00000236049	0	0	0
chr9	119454949	119456080	intron	0.518553	35.14	ENSG00000119401	0.00246415	6.96766	6.95576
chr13	41078144	41079143	Intergenic	0.518014	68.17	ENSG00000215483	-0.282223	0.102121	0.124186
chr3	169172434	169173433	intron	0.517642	25.49	ENSG00000085276	-0.21041	14.4517	16.7208
chr5	9686422	9687421	intron	0.517509	43.74	ENSG00000222054	0	0	0
chr3	57789473	57790483	intron	0.517139	38.61	ENSG00000163681	0.0380682	31.3154	30.4999
chrX	13390501	13391500	Intergenic	0.515399	3.02	ENSG00000226434	0.993367	0.0539949	0.0271219
chr21	39678282	39679281	Intergenic	0.514899	3.62	ENSG00000226012	-0.919982	0.0899941	0.170277
chr17	30488534	30489533	intron	0.514573	19.61	ENSG00000126858	-0.0663606	13.8022	14.4519
chr12	18900689	18901795	Intergenic	0.514175	28.05	ENSG00000177938	0	0	0
chr2	113581722	113582721	Intergenic	0.513967	30.31	ENSG00000125538	1.8533	129.449	35.826
chr3	8018846	8019845	intron	0.513672	10.56	ENSG00000071282	-0.283843	1.97953	2.40994
chrX	51902584	51903671	Intergenic	0.513672	11.46	ENSG00000154545	0.0280436	7.11573	6.97875
chr6	28907801	28908875	Intergenic	0.51277	16.44	ENSG00000204709	-2.00663	0.0256375	0.103022
chr21	40372182	40373181	Intergenic	0.512511	17.65	ENSG00000235888	0.161825	0.150344	0.134392
chr7	10215031	10216356	Intergenic	0.51247	10.41	ENSG00000212422	0	0	0
chr17	16311077	16312083	Intergenic	0.512301	12.67	ENSG00000187688	0.867678	0.298055	0.163343
chr21	16388332	16389331	intron	0.512301	4.83	ENSG00000180530	0.179007	8.03108	7.09395
chr4	153771106	153772136	intron	0.511969	44.79	ENSG00000250980		0.0235843	0
chr14	51837045	51838044	Intergenic	0.511696	4.98	ENSG00000258942	0.963439	0.114306	0.0586201
chr22	50977815	50978937	Intergenic	0.511422	83.25	ENSG00000226738	0	0	0
chr12	14989139	14990204	intron	0.51134	69.53	ENSG00000182993	-0.262287	2.06201	2.47313
chr1	70556278	70557381	intron	0.511209	15.99	ENSG00000066557	-0.054738	9.05453	9.40467
chr2	190739300	190740299	intron	0.51111	6.94	ENSG00000151689	-0.00599611	17.1747	17.2462
chr6	138064474	138065575	Intergenic	0.510894	15.84	ENSG00000234956	0.918334	0.512198	0.271014
chr1	86088520	86089519	Intergenic	0.510845	6.79	ENSG00000230285	2.21631	0.612822	0.131874
chr5	159363681	159364680	intron	0.510672	27.6	ENSG00000170214	0.137288	1.58658	1.44256
chr16	81458333	81459332	Intergenic	0.509981	22.17	ENSG00000153815	0.031073	59.5456	58.2768
chr3	87358534	87359563	Intergenic	0.509603	10.26	ENSG00000239829	0	0	0
chr21	30719988	30720987	intron	0.508612	3.32	ENSG00000156273	0.436522	14.3542	10.6065
chr17	9304437	9305436	intron	0.508547	24.28	ENSG00000225751	0	0	0
chr4	75410292	75411335	Intergenic	0.508166	19.15	ENSG00000205595	0.604624	40.1877	26.4291
chr8	22921603	22922669	intron	0.507747	36.8	ENSG00000120889	0.578942	94.6143	63.34
chr19	45198537	45199536	Intergenic	0.507342	8.14	ENSG00000224366	0	0	0
chr5	142955981	142957038	Intergenic	0.507033	127.74	ENSG00000251205	0	0	0
chr3	111820496	111821495	intron	0.506486	22.62	ENSG00000114529	0.323877	17.5878	14.0512
chr11	124064868	124066144	Intergenic	0.50621	16.59	ENSG00000197309	0	0	0
chr1	19239778	19240777	intron	0.505761	2.11	ENSG00000159423	-0.107573	4.64828	5.00813
chr3	192536507	192537563	intron	0.505652	49.62	ENSG00000114279	0.109037	4.43623	4.1133
chr4	113778436	113779435	intron	0.505268	10.26	ENSG00000145362	-0.203001	0.364787	0.419903
chr7	83698881	83699880	intron	0.505268	6.64	ENSG00000222994	0	0	0
chr1	22468420	22469419	intron	0.504882	4.37	ENSG00000162552	0.401012	1.02047	0.772828
chr10	126020885	126021884	Intergenic	0.504867	21.27	ENSG00000065154	-0.0268299	98.2734	100.118
chr9	119618245	119619335	intron	0.504852	58.67	ENSG00000119401	0.00246415	6.96766	6.95576
chr7	107851607	107852630	intron	0.50484	38.16	ENSG00000266112	0	0	0
chr15	60407816	60408815	Intergenic	0.504182	16.44	ENSG00000259223	0	0	0
chr5	169077772	169078838	intron	0.503997	13.88	ENSG00000134516	0.445697	0.504597	0.37049
chr6	134482126	134483125	Intergenic	0.503682	14.63	ENSG00000200058	0	0	0
chr7	87650120	87651245	intron	0.503421	16.89	ENSG00000008277	-0.104015	6.11901	6.57646
chr9	128189759	128190758	Intergenic	0.503131	20.81	ENSG00000214761	0.109017	3.28577	3.04663
chr12	44839189	44840195	Intergenic	0.502967	9.35	ENSG00000257864	-0.507288	0.0598539	0.0850749
chr2	213708767	213710021	Intergenic	0.502958	34.39	ENSG00000223373		0.0170608	0
chr16	77436242	77437482	intron	0.502005	17.19	ENSG00000140873	-2.54513	0.00846862	0.0494281
chr9	106995031	106996030	Intergenic	0.501845	12.22	ENSG00000242111	0	0	0
chr13	75939544	75940543	intron	0.501589	4.07	ENSG00000223880	0	0	0
chr5	90458130	90459421	intron	0.501446	73.75	ENSG00000176018	0.128993	11.1656	10.2106
chr13	52930194	52931193	Intergenic	0.501274	20.06	ENSG00000199605	0	0	0
chr2	32852967	32853985	intron	0.501043	13.27	ENSG00000018699	0.0593904	18.4475	17.7035
chr17	15547645	15548833	intron	0.500907	13.57	ENSG00000181464	2.72444	0.120746	0.0182699
chr14	72943245	72944244	intron	0.500742	16.59	ENSG00000200298	0	0	0
chr2	143635417	143636435	intron	0.500637	4.83	ENSG00000115919	0.10742	54.3836	50.4814
chr12	50690739	50691754	Intergenic	0.499973	22.47	ENSG00000269529	0	0	0
chr8	20044320	20045319	Intergenic	0.498947	3.92	ENSG00000036565	1.97381	0.0102363	0.00260595
chr3	71060464	71061556	intron	0.498788	10.1	ENSG00000244203		0	0.0427973
chr4	2862386	2863385	intron	0.498644	7.69	ENSG00000087274	-0.0958384	53.828	57.5253
chr5	16995113	16996112	Intergenic	0.498536	18.85	ENSG00000201436	0	0	0
chr6	138133074	138134106	Intergenic	0.498113	25.04	ENSG00000118503	2.2172	238.799	51.3557
chr10	5136630	5137629	intron	0.496954	3.92	ENSG00000239142	0	0	0
chrX	11118268	11119279	Intergenic	0.496859	16.89	ENSG00000234129	0.402812	0.258059	0.195191
chr21	45660352	45661381	promoter-TSS	0.496627	8.6	ENSG00000160223	1.20782	4.21929	1.82662
chr2	218316150	218317149	intron	0.496189	15.84	ENSG00000224414	1.71688	0.00821073	0.00249775
chr11	27157411	27158498	intron	0.495657	71.94	ENSG00000254560	-0.103288	8.72689	9.37459
chr6	116333226	116334323	intron	0.495332	4.83	ENSG00000111816	0.0185928	2.78761	2.75191
chr6	109459951	109461075	intron	0.494516	4.68	ENSG00000243587	-0.00764461	2.68171	2.69596
chr2	205186517	205187635	Intergenic	0.494508	17.19	ENSG00000236681	0	0	0
chr3	87789357	87790356	Intergenic	0.494508	3.32	ENSG00000200703	0	0	0
chr7	41465096	41466095	Intergenic	0.494419	5.58	ENSG00000224116	0.229334	0.158522	0.135224
chr3	13642246	13643245	intron	0.494259	9.5	ENSG00000224514		0	0.0197554
chr10	111726630	111727629	intron	0.494205	4.52	ENSG00000203876	0.267627	0.0374308	0.0310932
chr10	93443483	93444482	Intergenic	0.494085	18.1	ENSG00000213449	0	0	0
chr14	73350507	73351568	intron	0.493236	25.64	ENSG00000205683	-0.171602	2.87893	3.24257
chr5	131810522	131811521	intron	0.492988	11.91	ENSG00000234290	0.294911	0.64322	0.524303
chr22	44844800	44845964	Intergenic	0.492477	12.67	ENSG00000232655	0	0	0
chr4	80572236	80573255	Intergenic	0.492363	3.92	ENSG00000248408	0.0570363	0.209844	0.20171
chr10	14602280	14603379	intron	0.492334	6.18	ENSG00000236495	0	0	0
chr1	36653128	36654131	Intergenic	0.492064	6.18	ENSG00000264592	0	0	0
chr1	151284228	151285227	intron	0.492017	6.18	ENSG00000143393	0.0424905	44.2034	42.9205
chr20	22704811	22705810	Intergenic	0.492017	10.71	ENSG00000215553	-0.730806	0.0334072	0.0554414
chr6	27759576	27760923	Intergenic	0.491893	37.4	ENSG00000218069		0	0.143818
chr7	17719431	17720430	Intergenic	0.491875	43.13	ENSG00000228675		0	0.106471
chr19	4058241	4059578	intron	0.491618	3.02	ENSG00000178951	0.173695	4.12157	3.65406
chr6	31324251	31325325	intron	0.4911	14.33	ENSG00000234745	0.106131	401.14	372.69
chr1	200084382	200085510	intron	0.490986	13.12	ENSG00000229220	0	0	0
chr3	138344096	138345095	intron	0.490986	25.34	ENSG00000158234	-0.148179	29.2429	32.4061
chr14	87809770	87810769	Intergenic	0.490153	9.2	ENSG00000259028	0	0	0
chr14	20730819	20731818	Intergenic	0.489479	5.58	ENSG00000258459	-1.54149	0.0141058	0.0410614
chr5	129189589	129190671	Intergenic	0.489152	15.38	ENSG00000249421	-1.97484	0.0263525	0.103588
chr4	103515086	103516085	intron	0.488906	6.03	ENSG00000238553	0	0	0
chr4	169509092	169510285	intron	0.488821	19.3	ENSG00000129116	0.0194617	114.354	112.822
chr1	244762920	244763931	intron	0.488709	15.23	ENSG00000227735	0	0	0
chr7	140015820	140016945	Intergenic	0.488577	14.33	ENSG00000146955	-0.422967	0.626975	0.840573
chrX	16607368	16608367	3'	0.488467	4.07	ENSG00000169906		0	0.0314267
chr4	22970687	22971686	Intergenic	0.48811	31.97	ENSG00000248837		0	0.0141036
chr6	157971976	157972975	intron	0.487352	9.2	ENSG00000219448	-0.124954	0.0199936	0.0218024
chr12	70698639	70699645	intron	0.487251	19.3	ENSG00000257241	0	0	0
chr14	52372295	52373294	intron	0.486802	27.3	ENSG00000258928	0	0	0
chr8	39796918	39797917	intron	0.486769	10.41	ENSG00000131203	0.275266	3.11304	2.5723
chr16	29822672	29823767	promoter-TSS	0.486758	19.76	ENSG00000013364	-0.0266578	78.1839	79.642
chr8	32440756	32441755	intron	0.486555	4.22	ENSG00000252261	0	0	0
chr8	106227911	106229019	Intergenic	0.486432	101.05	ENSG00000169946	-0.107272	1.95713	2.1082
chr8	56851556	56852560	intron	0.48625	14.03	ENSG00000216204	0	0	0
chr12	110750420	110751419	intron	0.485973	6.03	ENSG00000174437	0.0443599	219.167	212.531
chr12	56732064	56733088	promoter-TSS	0.485956	23.07	ENSG00000110944	0.584926	5.66902	3.77944
chr16	9203783	9204782	intron	0.485861	4.22	ENSG00000260349	-0.00335002	6.38204	6.39688
chr3	189684807	189685806	intron	0.485427	8.29	ENSG00000225764	0.168889	0.852055	0.757927
chr20	35490624	35491623	exon	0.484746	5.28	ENSG00000149639	0.0125507	3.03885	3.01253
chr7	55208066	55209065	intron	0.484693	16.29	ENSG00000224057	0.0151638	5.91436	5.85252
chr3	99596423	99597422	intron	0.484573	6.18	ENSG00000184220	-0.020046	110.182	111.723
chr2	64430817	64431835	non-coding	0.484281	37.7	ENSG00000197329	0.235483	5.84824	4.9675
chr12	103790739	103791738	intron	0.483574	5.13	ENSG00000179088	0.222179	0.0436251	0.0373985
chr11	28788390	28789389	Intergenic	0.483523	4.68	ENSG00000249867	-0.0991751	4.43485	4.75044
chr5	118732939	118734030	Intergenic	0.483234	55.65	ENSG00000243333		0	0.0908249
chr8	143673083	143674082	Intergenic	0.483124	18.85	ENSG00000232722	0	0	0
chrX	62550318	62551317	Intergenic	0.482551	5.73	ENSG00000233661	0.769104	0.121357	0.0712101
chr3	182686914	182687983	intron	0.482176	18.25	ENSG00000043093	0.0787587	36.5386	34.5974
chr14	103243995	103245056	intron	0.482114	6.94	ENSG00000131323	0.0267678	16.074	15.7785
chr1	217103420	217104419	intron	0.481753	5.73	ENSG00000196482	0.375788	0.244914	0.188751
chr6	138187996	138189175	5'	0.48163	62.89	ENSG00000237499	0.724085	3.64592	2.20717
chr4	48225836	48226835	intron	0.481546	11.61	ENSG00000135605	0.0758837	1.43077	1.35746
chr15	92051389	92052639	Intergenic	0.480918	11.01	ENSG00000258551	-0.825973	0.032373	0.0573886
chr21	16794476	16795475	Intergenic	0.480361	13.12	ENSG00000229425	0	0	0
chr2	208337367	208338385	Intergenic	0.479929	5.88	ENSG00000144401	-0.0166384	21.3132	21.5604
chr6	134379557	134380823	Intergenic	0.479738	23.83	ENSG00000146411	0.0834877	1.16736	1.10173
chr2	143624817	143625835	Intergenic	0.479271	19.15	ENSG00000115919	0.10742	54.3836	50.4814
chr1	24373028	24374027	Intergenic	0.478698	10.1	ENSG00000225315	0	0	0
chr15	92058164	92059163	Intergenic	0.478546	8.6	ENSG00000258551	-0.825973	0.032373	0.0573886
chrX	81844622	81845650	Intergenic	0.478377	7.24	ENSG00000202183	0	0	0
chr1	186919320	186920319	exon	0.478047	10.41	ENSG00000116711	0.0429905	12.2365	11.8772
chr1	2509382	2510419	intron	0.476827	31.82	ENSG00000228037	-1.06959	0.0656955	0.137884
chr1	115153270	115154281	intron	0.476486	15.99	ENSG00000116752	-0.00332074	38.4928	38.5815
chr14	51288069	51289068	intron	0.476413	10.1	ENSG00000100503	0.0831687	22.9098	21.6264
chr10	227935	229044	intron	0.476112	5.88	ENSG00000015171	-0.095258	22.3326	23.857
chr6	109216976	109217975	intron	0.476013	1.96	ENSG00000118690	-0.059945	0.711986	0.742192
chr2	40016850	40017849	Intergenic	0.475963	39.36	ENSG00000227028	0.145258	0.465086	0.420539
chr9	18378945	18380010	Intergenic	0.475035	39.21	ENSG00000227167	0	0	0
chr9	132912959	132913958	Intergenic	0.474992	3.47	ENSG00000196979		0.00499435	0
chr2	133958336	133959466	intron	0.474881	16.89	ENSG00000176771	1.0755	0.125705	0.0596482
chr15	58076366	58077365	Intergenic	0.473813	4.37	ENSG00000103569	0	0	0
chr13	74171993	74172992	Intergenic	0.473454	15.08	ENSG00000224853	0	0	0
chr19	41337337	41338336	Intergenic	0.472996	14.03	ENSG00000130612	0	0	0
chr13	29132044	29133043	Intergenic	0.472866	7.99	ENSG00000235472	0.173286	3.75719	3.33195
chr18	8841808	8842807	Intergenic	0.472852	4.98	ENSG00000252319	0	0	0
chr1	110640828	110641827	Intergenic	0.472309	16.44	ENSG00000186150	0.196503	0.00585858	0.00511257
chr2	68694017	68695085	promoter-TSS	0.47221	20.51	ENSG00000204923	0.121338	0.642773	0.590924
chr1	30446681	30447810	Intergenic	0.471913	27.9	ENSG00000233399	0	0	0
chr6	30468295	30469294	Intergenic	0.471455	4.52	ENSG00000204592	0.0744433	122.973	116.788
chr4	162475892	162476935	intron	0.471162	7.69	ENSG00000249419	0	0	0
chr3	157053084	157054083	intron	0.471074	29.26	ENSG00000163661	1.76029	35.6467	10.5225
chr10	97025583	97026582	intron	0.470523	5.43	ENSG00000107438	0.0133394	110.997	109.975
chr3	17111834	17112833	intron	0.470327	5.43	ENSG00000226441	0	0	0
chr4	180336242	180337286	Intergenic	0.470288	24.13	ENSG00000250993	-0.376015	1.03967	1.34923
chr6	31887595	31888594	intron	0.469747	8.6	ENSG00000166278	0.306334	1.3206	1.06796
chr6	15073174	15074575	Intergenic	0.46937	22.02	ENSG00000234261	0	0	0
chr8	31678883	31679882	intron	0.469302	4.68	ENSG00000157168	0.0476071	107.479	103.991
chr1	231524532	231525769	intron	0.469301	8.45	ENSG00000116903	0.0557193	5.74991	5.53207
chr8	67389818	67390919	Intergenic	0.468391	23.38	ENSG00000206949	0	0	0
chr12	56236207	56237206	promoter-TSS	0.468254	4.07	ENSG00000123342	-0.0569561	1.53516	1.59698
chr4	110374436	110375435	intron	0.467733	23.98	ENSG00000243227		0	0.0856003
chr19	48828837	48829865	intron	0.467697	14.78	ENSG00000105479	-0.202313	0.0559538	0.0643771
chr6	24504751	24505825	intron	0.467496	34.99	ENSG00000112293	-0.222171	2.89193	3.3734
chr6	158720726	158721725	Intergenic	0.467474	53.84	ENSG00000130338	0.0113315	2.83437	2.8122
chr14	94839757	94840968	Intergenic	0.466362	50.37	ENSG00000258597	1.35407	0.0386861	0.0151335
chr4	44503886	44504885	Intergenic	0.465348	10.26	ENSG00000251159		0	0.115341
chr3	9393084	9394313	Intergenic	0.465282	35.59	ENSG00000196220	0.348865	2.84848	2.23663
chr1	52029628	52030627	Intergenic	0.465231	50.98	ENSG00000117859	-0.32013	43.4326	54.2231
chr6	29690851	29691975	intron	0.465036	6.49	ENSG00000204642	0.114503	24.1139	22.274
chr11	111589111	111590110	intron	0.464813	8.45	ENSG00000137713	0.0349299	18.9727	18.5189
chr6	41264657	41265745	Intergenic	0.464782	65.45	ENSG00000206745	0	0	0
chr5	78275881	78276880	intron	0.464731	18.4	ENSG00000113273	0.121491	11.8387	10.8826
chr6	32158474	32159575	3'	0.464111	3.02	ENSG00000204304	0.0947213	24.2081	22.6697
chr13	73544293	73545292	intron	0.463824	8.29	ENSG00000083520	-0.00118267	37.4965	37.5272
chr3	17071046	17072322	intron	0.463807	6.94	ENSG00000226441	0	0	0
chr16	90061333	90062491	non-coding	0.462924	17.95	ENSG00000141013	0.164424	15.0054	13.3891
chr5	50932163	50933162	Intergenic	0.462791	19.91	ENSG00000251125	0.196503	0.01039	0.00906695
chr8	23618811	23619869	Intergenic	0.461904	9.35	ENSG00000216123	0	0	0
chr4	48748837	48749905	intron	0.461673	16.59	ENSG00000075539	-0.109124	21.7951	23.5076
chr10	31389045	31390132	Intergenic	0.461347	14.93	ENSG00000263578	0	0	0
chr1	113071661	113072660	intron	0.461346	9.35	ENSG00000116489	-0.0134576	113.503	114.567
chr20	62322461	62323460	intron	0.461236	5.13	ENSG00000026036	0.175748	2.3183	2.05241
chr4	74782687	74783741	Intergenic	0.461022	26.09	ENSG00000249920	-0.0362879	1.02878	1.05499
chr1	16767020	16768031	intron	0.460949	9.8	ENSG00000157191	0.11167	22.2292	20.5735
chr7	106065216	106066319	Intergenic	0.46009	89.13	ENSG00000243438	0	0	0
chr20	24076474	24077542	Intergenic	0.459898	21.87	ENSG00000236151	0	0	0
chr7	105079331	105080406	Intergenic	0.459726	92.3	ENSG00000135250	-0.144792	30.6582	33.8948
chr17	59882961	59883960	intron	0.459432	4.83	ENSG00000136492	0.0810934	11.7378	11.0962
chrX	9431918	9433321	promoter-TSS	0.459432	1.66	ENSG00000101849	-0.546093	1.78534	2.60683
chr15	39747516	39748515	Intergenic	0.459327	70.58	ENSG00000259269	0	0	0
chr5	54892772	54893771	Intergenic	0.458728	22.77	ENSG00000152670	0	0	0
chr4	77813535	77814534	Intergenic	0.458709	20.21	ENSG00000242727	0	0	0
chr15	67412839	67413965	intron	0.458395	51.28	ENSG00000166949	0.524569	67.464	46.8987
chrX	16166884	16167883	intron	0.458205	4.98	ENSG00000238178	-0.0794237	2.9673	3.13524
chrX	73563001	73564000	Intergenic	0.456836	15.99	ENSG00000226515	0	0	0
chr1	56874761	56875760	Intergenic	0.456827	5.58	ENSG00000223956	0	0	0
chr20	509461	510460	intron	0.456827	1.51	ENSG00000101266	0.0607762	47.0815	45.1393
chr8	32559770	32560769	intron	0.456646	1.81	ENSG00000252261	0	0	0
chrX	71447330	71448383	intron	0.456586	2.87	ENSG00000102309	0.0993983	13.1879	12.3099
chr14	92221770	92222831	Intergenic	0.456536	66.06	ENSG00000133962	-0.201397	0.211207	0.242848
chrX	71090051	71091312	Intergenic	0.456298	2.41	ENSG00000229030	0	0	0
chr2	177147567	177148621	intron	0.456127	9.2	ENSG00000128654	-0.00910718	55.1384	55.4875
chr15	53149966	53150965	Intergenic	0.455587	20.51	ENSG00000214896	0.443609	0.126329	0.0928886
chr8	29481306	29482305	Intergenic	0.455518	8.9	ENSG00000243844		0	0.0192063
chr11	12279440	12280439	intron	0.455399	13.27	ENSG00000254680	-0.0351257	25.6906	26.3238
chr10	17130183	17131182	intron	0.455225	3.62	ENSG00000107611	0.776627	0.0270091	0.015766
chr20	56826674	56827673	intron	0.45432	24.28	ENSG00000124227	0	0	0
chr2	167969767	167970821	intron	0.454027	35.89	ENSG00000225182	0	0	0
chr7	80530531	80531530	intron	0.453987	7.39	ENSG00000075223	0.0472285	177.612	171.892
chr9	81835799	81836958	Intergenic	0.453987	15.53	ENSG00000260995	0	0	0
chr15	67239714	67240713	Intergenic	0.453851	6.94	ENSG00000259289	0.972241	0.0304013	0.015496
chrX	107604884	107605883	intron	0.453851	2.56	ENSG00000197565	-0.061749	29.6202	30.9155
chr4	166604736	166605735	promoter-TSS	0.453534	6.03	ENSG00000249500	0.723799	0.133911	0.0810833
chr4	69568836	69569841	Intergenic	0.452596	63.64	ENSG00000248635	0	0	0
chr20	49744861	49745860	Intergenic	0.452317	10.86	ENSG00000228820	1.78147	0.033999	0.00988991
chr3	189771884	189772922	intron	0.451523	11.01	ENSG00000090530	-0.0297056	539.332	550.552
chr15	91928664	91929663	Intergenic	0.451471	5.73	ENSG00000258551	-0.825973	0.032373	0.0573886
chr18	46773708	46775383	intron	0.450554	11.16	ENSG00000141627	-0.104121	15.3604	16.5099
chr9	95895849	95896894	intron	0.449981	31.52	ENSG00000131669	0.270278	16.4265	13.6202
chr1	11623432	11624519	Intergenic	0.449956	17.34	ENSG00000235643	-1.43772	0.0273575	0.0741092
chr5	43421839	43422871	Intergenic	0.449606	74.5	ENSG00000151882	-0.0142059	7.00289	7.07219
chr6	116708151	116709225	intron	0.449384	36.95	ENSG00000189241	-0.0547802	12.7036	13.1952
chr2	67482872	67484016	intron	0.448994	16.74	ENSG00000236780	0.87425	0.0392015	0.0213859
chr7	106370331	106371419	Intergenic	0.448792	19.91	ENSG00000177820		0.000207322	0
chrX	23901672	23902817	intron	0.448742	7.24	ENSG00000165182	1.50019	0.0629345	0.0222477
chr16	68670033	68671041	Intergenic	0.448424	29.86	ENSG00000062038	-0.00943618	202.649	203.979
chr7	158374116	158375115	intron	0.448307	6.79	ENSG00000155093	-0.477596	0.11913	0.165879
chr20	13316943	13318023	Intergenic	0.448284	10.41	ENSG00000101230	0.0476587	0.555466	0.537416
chr12	92011539	92012538	Intergenic	0.448236	11.76	ENSG00000258125	0	0	0
chr4	103988787	103989786	intron	0.448178	7.54	ENSG00000164038	-0.0703759	6.22215	6.5332
chr17	70462561	70463626	intron	0.447963	6.94	ENSG00000243514	0.71688	0.117357	0.0714016
chr2	97158672	97159766	Intergenic	0.447937	31.82	ENSG00000163121	1.24956	7.72737	3.24995
chr12	90647089	90648088	Intergenic	0.447864	10.71	ENSG00000258183		0	0.0429584
chr9	75733399	75734480	Intergenic	0.447853	11.31	ENSG00000135046	0.0200598	510.517	503.467
chr4	75096287	75097286	intron	0.447605	18.7	ENSG00000269559	0.450216	0.395793	0.289694
chr3	45593064	45594106	Intergenic	0.447491	17.95	ENSG00000232455		0.0207497	0
chr10	121281333	121282332	intron	0.446385	4.37	ENSG00000148908	0.13573	31.6092	28.771
chr5	172141813	172142812	Intergenic	0.445925	7.69	ENSG00000253445	-0.520807	1.14679	1.64537
chr8	42111270	42112269	Intergenic	0.445635	5.28	ENSG00000253408	0.339375	1.94771	1.53943
chr21	39695732	39696827	Intergenic	0.445389	18.1	ENSG00000231231	0	0	0
chr12	57274855	57275938	Intergenic	0.445333	9.95	ENSG00000170426	0.196503	0.0097832	0.00853744
chr1	92197370	92198430	intron	0.445188	48.56	ENSG00000203914	-2.41387	0.00486819	0.0259426
chr3	10210381	10211533	intron	0.44492	94.86	ENSG00000134070	1.27092	9.93838	4.11841
chr1	117652970	117654031	TTS	0.444234	3.77	ENSG00000134253	-0.255309	1.47411	1.75949
chr22	46299112	46300111	Intergenic	0.444234	25.49	ENSG00000235091	-0.475053	0.0587566	0.0816699
chr14	55164345	55165344	intron	0.443646	7.99	ENSG00000020577	0.219732	26.6195	22.8588
chr3	17734396	17735395	intron	0.443499	8.6	ENSG00000226238	0	0	0
chr2	139173450	139174449	Intergenic	0.442897	12.97	ENSG00000230569	0.196503	0.0123232	0.010754
chr11	105589940	105590939	intron	0.442765	14.03	ENSG00000152578	-0.150873	0.0135452	0.0150384
chr3	191781184	191782183	Intergenic	0.442679	7.09	ENSG00000222583	0	0	0
chr8	23388420	23389419	intron	0.442485	3.62	ENSG00000147454	0.180709	65.6168	57.8917
chr3	189428146	189429163	intron	0.442245	104.82	ENSG00000073282	0.0905656	24.8388	23.3275
chrX	104704372	104705383	intron	0.442129	6.18	ENSG00000133149		0.00578528	0
chr18	71313147	71314285	Intergenic	0.441992	14.03	ENSG00000265380	0	0	0
chr5	131409480	131410521	intron	0.441751	22.77	ENSG00000164400	4.26032	158.633	8.27769
chr6	151134607	151135606	intron	0.441615	16.44	ENSG00000226599	0	0	0
chr6	13668426	13669425	intron	0.44132	6.03	ENSG00000010017	0.0951332	25.4361	23.8129
chr2	192186586	192187666	intron	0.441243	15.84	ENSG00000128641	0.0235831	214.172	210.699
chr9	134603099	134604394	intron	0.441164	12.82	ENSG00000107263	0.0946525	27.0619	25.3434
chr1	8600382	8601469	intron	0.441155	41.17	ENSG00000226545	0	0	0
chr6	112806401	112807594	Intergenic	0.441138	11.31	ENSG00000232299	0	0	0
chr2	208200900	208201899	Intergenic	0.441123	4.68	ENSG00000118260	0.170175	42.6837	37.9344
chr7	43908857	43910030	promoter-TSS	0.440916	77.22	ENSG00000237972	-0.405072	0.0618779	0.0819359
chr1	65363582	65364619	intron	0.440534	67.72	ENSG00000162434	0.126457	22.5188	20.629
chr11	12269890	12270894	intron	0.440511	62.89	ENSG00000254680	-0.0351257	25.6906	26.3238
chr13	99793078	99794092	Intergenic	0.440448	38.46	ENSG00000230871	0	0	0
chr2	237284872	237286016	intron	0.440386	17.34	ENSG00000232893	0.0480873	0.159033	0.153819
chr19	41426929	41427990	Intergenic	0.44001	116.43	ENSG00000256612	0.752567	0.09063	0.0537931
chr11	10864049	10865217	Intergenic	0.439912	25.64	ENSG00000246308	-0.33008	0.0530597	0.0667005
chr16	67554872	67555891	intron	0.439763	19.61	ENSG00000039523	0.194995	32.0189	27.9709
chr3	106787346	106788345	Intergenic	0.439346	11.61	ENSG00000239455	0.0531356	0.0139342	0.0134303
chr11	19449818	19450817	intron	0.439102	24.73	ENSG00000166833	0.132	10.5716	9.64731
chr9	38382545	38383544	Intergenic	0.438977	2.56	ENSG00000137124	-0.090869	6.30265	6.71239
chr6	160409826	160410825	intron	0.438667	0.75	ENSG00000197081	-0.0244015	42.7407	43.4697
chr19	18132016	18133028	Intergenic	0.438157	50.37	ENSG00000268298	-0.720423	0.13073	0.215399
chr1	32396832	32398260	intron	0.437908	8.6	ENSG00000184007	0.0299824	169.509	166.022
chr8	8636933	8637932	Intergenic	0.437183	4.22	ENSG00000254367		0	0.12123
chr6	106039274	106040306	Intergenic	0.437121	8.75	ENSG00000237567	0	0	0
chr8	59465970	59467017	intron	0.436766	17.19	ENSG00000137575	0.125362	105.817	97.0104
chr7	47674670	47675765	Intergenic	0.436153	12.97	ENSG00000236078	0.190545	0.0862129	0.0755462
chr16	9221492	9222532	Intergenic	0.435926	35.74	ENSG00000260349	-0.00335002	6.38204	6.39688
chr18	51473208	51474207	Intergenic	0.435626	17.65	ENSG00000221058	0	0	0
chr3	49334134	49335133	intron	0.435597	6.64	ENSG00000199546	-0.60161	26.8714	40.7749
chr1	186943470	186944631	intron	0.43557	33.18	ENSG00000236030	0	0	0
chr1	36723582	36724669	intron	0.435525	4.37	ENSG00000054118	0.0265783	44.248	43.4403
chr2	64395286	64396285	Intergenic	0.435368	3.62	ENSG00000225889	-0.186034	1.36826	1.55657
chr11	129574590	129575589	Intergenic	0.435201	99.09	ENSG00000255188	0	0	0
chr3	115724046	115725045	intron	0.434219	9.5	ENSG00000206889	0	0	0
chr1	212781720	212782831	intron	0.433976	17.19	ENSG00000264590	0	0	0
chr9	18393031	18394110	Intergenic	0.43384	45.4	ENSG00000227167	0	0	0
chr15	44326890	44327889	intron	0.433682	4.83	ENSG00000171877	-0.0194159	17.8413	18.083
chr6	111621974	111623056	intron	0.433247	30.01	ENSG00000218676	-0.00536434	0.00504584	0.00506463
chr2	70160800	70161916	intron	0.433169	8.14	ENSG00000268328		0.620899	0
chr5	144858772	144859771	Intergenic	0.432712	21.57	ENSG00000248125		0	0.0174066
chr18	55447747	55448828	intron	0.43227	26.39	ENSG00000081923	0.0646737	42.081	40.2362
chr12	90341239	90342313	Intergenic	0.432268	27.45	ENSG00000258290	0	0	0
chr4	74870706	74871785	Intergenic	0.432013	69.83	ENSG00000244194	0	0	0
chr21	34602228	34603281	intron	0.431784	7.69	ENSG00000159110	0.2617	9.36801	7.8139
chr15	85177590	85178589	intron	0.431339	2.71	ENSG00000176700	-0.0250793	3.43368	3.49389
chr5	139691213	139692270	Intergenic	0.431096	16.44	ENSG00000113068	-0.0410793	102.974	105.948
chr5	79789080	79790112	intron	0.430603	87.77	ENSG00000152380	0.0607664	0.438419	0.420336
chr1	237923120	237924131	intron	0.430597	7.09	ENSG00000252290	0	0	0
chr11	75364990	75365989	intron	0.429723	40.27	ENSG00000171533	0.305454	0.0603841	0.0488621
chr5	39907281	39908280	Intergenic	0.429358	23.68	ENSG00000248651	0	0	0
chr2	145131672	145132671	Intergenic	0.429209	15.68	ENSG00000213410	-0.252895	0.4863	0.579473
chr1	85831731	85832730	intron	0.429074	8.6	ENSG00000223653	-0.901774	0.125206	0.23393
chr6	132935726	132936725	Intergenic	0.429074	5.13	ENSG00000179073	0	0	0
chr1	2186970	2188031	intron	0.428832	5.88	ENSG00000157933	0.133606	14.0623	12.8185
chr5	13977289	13978421	Intergenic	0.428228	7.69	ENSG00000039139	-0.0319341	6.88015	7.03414
chr17	41363227	41364236	promoter-TSS	0.42795	5.13	ENSG00000184988	-0.214508	0.40059	0.464808
chr16	77430883	77432129	intron	0.427921	6.18	ENSG00000140873	-2.54513	0.00846862	0.0494281
chr15	67466839	67467839	intron	0.427173	85.06	ENSG00000259202		0	0.0588074
chr3	149083907	149084922	Intergenic	0.42692	52.33	ENSG00000240541	-0.095715	0.195988	0.209431
chr4	188523187	188524186	intron	0.426834	22.62	ENSG00000249642	0	0	0
chr8	118874520	118875560	intron	0.42658	21.27	ENSG00000182197	0.0824172	142.077	134.188
chr4	15678936	15679935	Intergenic	0.426396	8.9	ENSG00000118564	-0.0892937	19.0341	20.2494
chr2	54900336	54901366	Intergenic	0.426355	23.68	ENSG00000228108	0	0	0
chr19	33071966	33073028	intron	0.426314	17.65	ENSG00000105185	0.0762624	130.505	123.786
chr10	49572235	49573429	intron	0.425705	22.47	ENSG00000107643	-0.0548719	43.3991	45.0816
chr3	23207296	23208295	Intergenic	0.425655	5.73	ENSG00000215016		0.0269974	0
chr2	204362736	204363735	intron	0.425457	5.13	ENSG00000173166	0.0676208	5.03495	4.8044
chr5	139724930	139725929	intron	0.425044	7.39	ENSG00000113070	1.98012	43.3859	10.997
chr14	28141720	28142781	Intergenic	0.425008	40.12	ENSG00000258932	0.183056	2.25077	1.98256
chr1	68041420	68042580	Intergenic	0.42461	19.61	ENSG00000238139	0	0	0
chr6	30971501	30972694	Intergenic	0.424598	21.72	ENSG00000261272	0.0244222	0.0071756	0.00705515
chr8	26014606	26015660	Intergenic	0.424598	21.72	ENSG00000199620	0	0	0
chr5	56623289	56624371	Intergenic	0.424339	19.91	ENSG00000248586		0.00417559	0
chrX	13105430	13106433	Intergenic	0.424339	18.55	ENSG00000261030		0.0107873	0
chr2	28693336	28694335	Intergenic	0.424231	4.68	ENSG00000163803	0.0183773	0.496398	0.490115
chr1	41372470	41373469	Intergenic	0.424102	7.09	ENSG00000228940	0	0	0
chrX	70338080	70339150	exon	0.423986	2.26	ENSG00000184634	0.403037	6.9239	5.2363
chr4	101300506	101301635	Intergenic	0.423923	25.79	ENSG00000145358	0.0874677	0.579698	0.545596
chr7	90602457	90603480	intron	0.423648	60.78	ENSG00000223969	0.00584095	0.672699	0.669981
chr1	66277728	66278727	intron	0.423626	2.41	ENSG00000184588	-0.128178	1.26876	1.38664
chr4	5501935	5502934	3'	0.423574	6.94	ENSG00000201496	0	0	0
chr20	57090161	57091160	promoter-TSS	0.423561	26.54	ENSG00000198768	-0.229764	3.02693	3.54951
chrX	46582280	46583417	intron	0.423561	7.54	ENSG00000065923	-0.045247	10.1954	10.5202
chr3	134191046	134192045	Intergenic	0.423384	6.03	ENSG00000182923	-0.229254	18.9685	22.2354
chr5	458630	459771	intron	0.423206	78.58	ENSG00000188242	0.0621894	20.3684	19.509
chr3	23726896	23727895	Intergenic	0.422895	18.7	ENSG00000212269	0	0	0
chr7	148469681	148470692	intron	0.422691	7.99	ENSG00000264918	0.277864	176.769	145.801
chr2	122117700	122118866	intron	0.422196	41.17	ENSG00000264229	1.64951	6.263	1.99631
chr1	241694820	241695831	promoter-TSS	0.422083	13.57	ENSG00000117009	0.58009	1.96535	1.31466
chr15	81711414	81712413	intron	0.422047	8.75	ENSG00000259543	0	0	0
chr3	130126531	130127545	intron	0.421516	55.65	ENSG00000172752	0.862153	0.0134785	0.00741494
chr12	31360039	31361304	Intergenic	0.42097	12.52	ENSG00000177359	0.0541358	2.17438	2.0943
chr20	49253441	49254523	promoter-TSS	0.420863	4.22	ENSG00000231302	0	0	0
chr1	15526811	15527931	intron	0.420325	15.99	ENSG00000204464	-0.230896	0.0283875	0.0333145
chr2	187426172	187427216	Intergenic	0.420289	19.76	ENSG00000138448	0.18296	87.1733	76.7905
chr1	173442128	173443127	intron	0.420126	13.72	ENSG00000117592	0.0196705	243.955	240.652
chr11	80026511	80027510	Intergenic	0.419817	21.42	ENSG00000254434		0.0403989	0
chr9	133320545	133321610	intron	0.419683	53.24	ENSG00000130707	0.0307411	79.8705	78.1866
chr2	100981686	100982685	Intergenic	0.419638	133.47	ENSG00000269383	0	0	0
chr3	107711896	107712922	Intergenic	0.419616	89.58	ENSG00000196776	0.0912955	311.272	292.185
chr3	158449714	158450783	promoter-TSS	0.41944	37.7	ENSG00000118855	-0.0523914	48.1636	49.9448
chr1	244599632	244600677	exon	0.41943	59.87	ENSG00000035687	-0.0758116	38.6565	40.7421
chr9	127173399	127174408	intron	0.419297	4.83	ENSG00000136930	0.0184479	192.304	189.86
chr13	76722978	76723992	Intergenic	0.418822	9.95	ENSG00000243274	0	0	0
chr4	189353056	189354055	Intergenic	0.418621	4.22	ENSG00000249378		0.0292893	0
chr3	11320257	11321256	intron	0.418488	3.92	ENSG00000197548	-0.0807822	19.6877	20.8215
chr13	20765944	20767077	intron	0.418262	15.38	ENSG00000165474	0.221904	11.2999	9.68892
chr3	23366257	23367256	intron	0.418245	3.92	ENSG00000182247	0.0372597	11.7706	11.4705
chr5	148552130	148553521	intron	0.418079	15.99	ENSG00000157510	-0.088044	15.9601	16.9644
chr2	216274636	216275766	intron	0.418052	34.08	ENSG00000115414	0.137515	202.335	183.939
chr4	45188137	45189136	Intergenic	0.417549	4.98	ENSG00000248320	0	0	0
chr3	189934596	189935663	Intergenic	0.417443	13.88	ENSG00000238077		0.0111997	0
chr4	27788186	27789227	Intergenic	0.417187	9.35	ENSG00000251410	0	0	0
chr20	48950474	48951473	Intergenic	0.417058	13.57	ENSG00000233077	0.279823	0.158835	0.130831
chr18	59560486	59561485	promoter-TSS	0.416684	2.71	ENSG00000176641	0.251971	1.33344	1.11975
chr2	28910650	28911649	Intergenic	0.416558	6.94	ENSG00000222232	0	0	0
chr20	58345724	58346723	intron	0.416408	29.71	ENSG00000238194	0	0	0
chr11	98235890	98236889	Intergenic	0.415823	27.9	ENSG00000254939	0.274769	0.0503082	0.0415839
chr4	151586037	151587036	intron	0.415037	23.98	ENSG00000198589	0.13748	32.712	29.7386
chr7	26195631	26196706	intron	0.414539	56.1	ENSG00000050344	-0.0328032	71.9883	73.6439
chr7	110777881	110778906	intron	0.414375	84.76	ENSG00000184903	-0.0863312	21.1115	22.4134
chr6	12545851	12546894	Intergenic	0.414354	22.17	ENSG00000212802	-0.0251881	236.346	240.509
chr14	55110020	55111031	intron	0.413743	14.78	ENSG00000020577	0.219732	26.6195	22.8588
chr19	45227337	45228336	Intergenic	0.413731	4.68	ENSG00000252200	0	0	0
chr3	107940634	107941772	5'	0.413519	10.71	ENSG00000114446	0.0357255	49.6018	48.3886
chr3	30361107	30362106	Intergenic	0.413505	5.28	ENSG00000199927		0.232825	0
chr11	121915590	121916694	Intergenic	0.413441	63.19	ENSG00000252556	0	0	0
chr6	114084457	114085523	Intergenic	0.413401	9.2	ENSG00000253091	0	0	0
chr12	133022055	133023119	Intergenic	0.413263	10.26	ENSG00000256783	0	0	0
chr4	181055156	181056185	Intergenic	0.41291	28.2	ENSG00000248921	0	0	0
chr2	113540867	113541921	intron	0.412693	10.86	ENSG00000115008	2.13369	208.623	47.54
chr2	4182636	4183766	Intergenic	0.412019	5.13	ENSG00000229550		0.0331583	0
chr21	27335252	27336431	intron	0.411359	48.56	ENSG00000224541		0	0.0722962
chr2	114087100	114088116	Intergenic	0.411305	15.68	ENSG00000125618	0.33716	0.511492	0.404896
chr6	167150224	167151375	intron	0.410919	84.16	ENSG00000026297	-0.182042	12.3316	13.99
chr17	983977	984983	intron	0.410904	79.63	ENSG00000235361	0	0	0
chr3	194918607	194919606	intron	0.410684	9.5	ENSG00000173950	-0.036445	11.882	12.186
chr6	11367176	11368350	intron	0.410306	8.14	ENSG00000111859	0.513328	15.6208	10.944
chr6	122115007	122116006	Intergenic	0.410142	12.97	ENSG00000220184	0	0	0
chr7	123903181	123904180	Intergenic	0.409294	8.29	ENSG00000234224		0	0.00331383
chr15	41252540	41253719	Intergenic	0.409119	27.3	ENSG00000128965	0.430053	11.399	8.4607
chr15	85472339	85473389	intron	0.408945	42.83	ENSG00000156222	0.321951	0.174058	0.139244
chr21	43068275	43069331	Intergenic	0.40882	50.37	ENSG00000227702	-1.46726	0.0360489	0.0996736
chr2	64341717	64342735	intron	0.408757	2.56	ENSG00000225889	-0.186034	1.36826	1.55657
chr17	9415661	9416660	intron	0.407941	14.33	ENSG00000170310	0.00535671	36.6382	36.5024
chr14	71236995	71238306	intron	0.407634	6.64	ENSG00000006432	0.0800196	6.17623	5.84299
chr1	19876070	19877231	Intergenic	0.407492	60.63	ENSG00000239027	0	0	0
chr17	1493284	1494294	intron	0.407397	99.39	ENSG00000174238	0.0032286	117.723	117.46
chr3	138000307	138001422	intron	0.407319	27	ENSG00000181322	-0.181196	0.309765	0.351219
chr10	64529183	64530182	Intergenic	0.407045	1.96	ENSG00000181915	-0.0977633	5.45989	5.8427
chr15	56311439	56312639	Intergenic	0.406502	33.33	ENSG00000239703	0.77692	0.397788	0.232154
chr17	45197034	45198033	3'	0.406497	6.49	ENSG00000221016	0	0	0
chr1	64196928	64197927	Intergenic	0.406475	44.94	ENSG00000185483	0.109392	4.6654	4.32473
chr2	145115667	145116685	Intergenic	0.406469	56.1	ENSG00000213410	-0.252895	0.4863	0.579473
chr19	30155179	30156190	promoter-TSS	0.405852	16.29	ENSG00000166289	0.668001	2.78346	1.75185
chr14	45750745	45751931	Intergenic	0.405846	73.15	ENSG00000199739	0	0	0
chr9	97343495	97344494	intron	0.405736	10.71	ENSG00000130957	0.447674	0.155681	0.114149
chr17	57244661	57245660	intron	0.405639	8.29	ENSG00000068489	0.0368182	54.4694	53.0969
chr15	45747939	45748989	Intergenic	0.404948	73.3	ENSG00000166920	0.359178	70.3761	54.8658
chr1	65431470	65432531	intron	0.404937	4.83	ENSG00000162434	0.126457	22.5188	20.629
chr18	54069658	54070696	Intergenic	0.404731	3.92	ENSG00000091157	0.369285	4.56222	3.53192
chr20	31559624	31560623	Intergenic	0.404688	24.13	ENSG00000215529		0	0.0206657
chr6	143266801	143268075	Intergenic	0.40442	78.42	ENSG00000232618	2.27965	0.373034	0.0768253
chr11	113256245	113257467	Intergenic	0.404201	9.65	ENSG00000170209	0.783109	0.518796	0.301479
chr16	23121283	23122282	intron	0.404066	13.42	ENSG00000103404	0.183346	13.6058	11.982
chr16	77598593	77599592	Intergenic	0.403999	3.92	ENSG00000261154	0	0	0
chr11	128212295	128213460	Intergenic	0.403923	11.01	ENSG00000254588		0.0120712	0
chr3	133259607	133260606	Intergenic	0.403713	19.3	ENSG00000250983	0	0	0
chr12	54652707	54653706	5'	0.403394	12.37	ENSG00000111481	0.031472	120.762	118.156
chr5	73092189	73093188	intron	0.403099	8.45	ENSG00000184084	0.0531348	1.45523	1.40261
chr13	61136168	61137293	intron	0.40307	10.41	ENSG00000212054	0	0	0
chr6	143153907	143154906	intron	0.40307	29.41	ENSG00000233138	1.71688	0.153968	0.046838
chr15	36720240	36721319	Intergenic	0.403035	82.95	ENSG00000259737		0.0702094	0
chr2	10169086	10170085	Intergenic	0.402552	13.57	ENSG00000260476	0	0	0
chr1	115611532	115612569	intron	0.402269	24.73	ENSG00000134198	0.149409	13.1182	11.8276
chr1	36788578	36789631	intron	0.402027	0.45	ENSG00000142694	-0.0213647	2.54959	2.58763
chr1	226084911	226085910	Intergenic	0.401401	28.66	ENSG00000196187	0.0216206	22.1282	21.7991
chrX	41160222	41161350	Intergenic	0.401328	4.07	ENSG00000199564	0	0	0
chr1	209594161	209595181	Intergenic	0.401274	28.35	ENSG00000230937	0.300509	203.745	165.434
chr2	43746386	43747385	intron	0.401049	29.71	ENSG00000115970	0.0188584	28.6657	28.2934
chr21	30568202	30569231	intron	0.40099	55.05	ENSG00000156273	0.436522	14.3542	10.6065
chr10	121297880	121298879	intron	0.400976	9.05	ENSG00000148908	0.13573	31.6092	28.771
chr6	116772045	116773044	Intergenic	0.40018	12.97	ENSG00000217241	0.00039511	10.0515	10.0488
chr8	8939320	8940402	Intergenic	0.400172	7.54	ENSG00000239078	0	0	0
chrX	20283868	20284921	intron	0.399963	1.96	ENSG00000177189	-0.0975187	15.0314	16.0826
chr5	86423631	86424630	intron	0.399843	8.6	ENSG00000251951	0	0	0
chr12	94009989	94010988	Intergenic	0.399812	18.1	ENSG00000186076	-0.0555446	105.597	109.741
chr21	24462682	24463681	Intergenic	0.399346	6.33	ENSG00000230972	0	0	0
chr2	85505272	85506271	intron	0.398988	13.42	ENSG00000230299	0	0	0
chr10	17009333	17010844	intron	0.398769	6.79	ENSG00000148484	0.0282363	20.1676	19.7767
chr10	34569333	34570409	intron	0.398614	27	ENSG00000223470	0	0	0
chrX	45481372	45482467	Intergenic	0.398477	3.92	ENSG00000214282	0.2099	0.660948	0.571454
chr9	21873049	21874080	Intergenic	0.398156	12.07	ENSG00000099810	-0.00717006	45.8364	46.0648
chr9	101867509	101868508	intron	0.398043	5.28	ENSG00000106799	0.12568	4.28825	3.93049
chr12	110405739	110406738	intron	0.397729	3.62	ENSG00000139436	0.023037	17.8127	17.5305
chr1	59084070	59085081	Intergenic	0.397525	25.04	ENSG00000185839	0.107706	20.0329	18.5918
chr3	119900707	119901706	intron	0.397503	8.6	ENSG00000206721	0	0	0
chr4	165278835	165279834	intron	0.396969	9.35	ENSG00000145416	0.00132959	6.75958	6.75335
chr12	90484496	90485538	Intergenic	0.396884	50.52	ENSG00000257194		0.00921389	0
chr3	189948323	189949483	Intergenic	0.396747	16.59	ENSG00000238077		0.0111997	0
chr13	110298818	110299893	Intergenic	0.39637	36.8	ENSG00000234854	0	0	0
chr2	28847867	28848871	intron	0.396316	14.48	ENSG00000230730		0	0.0208126
chr2	178146367	178147485	Intergenic	0.395865	21.87	ENSG00000018510	-0.0578398	20.2427	21.0707
chr5	33806931	33808038	intron	0.395722	34.84	ENSG00000151388	0.0336486	10.8591	10.6088
chr2	202014372	202015616	intron	0.395656	12.97	ENSG00000226312	1.39573	3.20947	1.21977
chr1	186970320	186971319	Intergenic	0.395567	6.79	ENSG00000236030	0	0	0
chr11	10229168	10230167	intron	0.395245	4.83	ENSG00000133812	0.0210756	15.1712	14.9512
chr14	73103369	73104368	intron	0.394837	6.18	ENSG00000200298	0	0	0
chr6	18502576	18504323	Intergenic	0.394833	13.42	ENSG00000218976	0.775541	0.21785	0.127261
chr1	59305828	59306827	intron	0.394718	5.43	ENSG00000234807	-1.22732	0.00841624	0.0197051
chr3	183003096	183004163	intron	0.394686	73.3	ENSG00000176597	0.437805	23.9367	17.6714
chr2	150597467	150598585	intron	0.394568	101.65	ENSG00000162947	-0.510899	0.0218824	0.031181
chr5	158938063	158939062	Intergenic	0.394198	20.06	ENSG00000266432	0	0	0
chr5	17257963	17258962	intron	0.394051	16.14	ENSG00000206814	0	0	0
chr9	6902259	6903258	intron	0.393868	6.94	ENSG00000107077	-0.0662803	4.89193	5.12192
chr7	148917266	148918265	intron	0.393719	4.37	ENSG00000170260	0.0274066	4.72887	4.63988
chr7	107951457	107952465	intron	0.392957	54.44	ENSG00000091129	0.142251	0.432209	0.391626
chr1	168439428	168440480	Intergenic	0.392918	13.72	ENSG00000215833		0	0.0283055
chr10	23710683	23711694	Intergenic	0.392877	42.08	ENSG00000165312	0.347459	1.67798	1.31884
chr5	142128272	142129338	intron	0.392573	17.49	ENSG00000236714	-1.12312	0.00326071	0.00710238
chr18	47766779	47767778	intron	0.392426	5.43	ENSG00000172361	0.154055	0.296483	0.266456
chr12	16542107	16543106	Intergenic	0.392424	21.11	ENSG00000008394	0.0417534	726.028	705.317
chr2	157312017	157313085	intron	0.392202	12.52	ENSG00000115159	-0.0983761	55.4691	59.3834
chr1	211581070	211582069	intron	0.391973	13.72	ENSG00000153363	-0.0308544	27.5484	28.144
chr6	138173901	138175106	intron	0.391902	46.45	ENSG00000118503	2.2172	238.799	51.3557
chr6	151446951	151447950	Intergenic	0.391741	3.32	ENSG00000213087		0	0.0408328
chr12	127256439	127257445	promoter-TSS	0.39166	92.3	ENSG00000256128	0.753673	2.7231	1.61505
chr7	73314246	73315245	Intergenic	0.391432	6.03	ENSG00000175877	0.0756042	0.164542	0.156141
chr7	18871366	18872365	intron	0.391407	8.9	ENSG00000221393	0	0	0
chr9	110151445	110152444	Intergenic	0.391097	34.99	ENSG00000226825	0	0	0
chr10	61468833	61469894	5'	0.390941	10.86	ENSG00000165449	0.145724	1.85749	1.67904
chr6	73497276	73498300	intron	0.390117	70.88	ENSG00000185760	-0.194577	3.32752	3.80798
chr8	81446233	81447232	Intergenic	0.390023	9.95	ENSG00000254162	0.37903	0.147053	0.113077
chr19	55884629	55885628	Intergenic	0.389726	5.13	ENSG00000160472	0.459654	0.130665	0.0950143
chrX	73469968	73470967	intron	0.389673	0.3	ENSG00000199168	0	0	0
chr1	90292070	90293069	intron	0.38964	25.19	ENSG00000226394	0	0	0
chr5	57381072	57382129	Intergenic	0.389563	16.29	ENSG00000238899	0	0	0
chr9	71770009	71771008	intron	0.388932	8.14	ENSG00000119139	0.0823243	58.0838	54.8621
chr8	6722106	6723105	Intergenic	0.388836	14.33	ENSG00000164825		0	0.106723
chr1	120529970	120531231	intron	0.388751	6.18	ENSG00000261662	-0.0168005	0.220829	0.223415
chr21	42953632	42954801	Intergenic	0.38875	7.09	ENSG00000223400	0	0	0
chr14	55368582	55369594	exon	0.388301	25.79	ENSG00000131979	0.334697	6.99084	5.54339
chr10	49200533	49201909	Intergenic	0.388229	1.51	ENSG00000188279	0.346192	46.38	36.4852
chr14	35683170	35684406	intron	0.387289	38.76	ENSG00000092020	-0.0354155	27.167	27.8422
chr2	80711167	80712166	intron	0.387266	6.03	ENSG00000162951	0	0	0
chr19	19717037	19718036	intron	0.387074	7.99	ENSG00000105717	-0.140605	0.901186	0.993439
chr10	72592780	72593779	intron	0.386656	5.43	ENSG00000166224	0.0919619	9.22898	8.65906
chr15	66702940	66703939	intron	0.386228	5.13	ENSG00000169032	0.0849452	52.9448	49.9174
chr1	95239061	95240081	intron	0.386037	19.76	ENSG00000224081	0.440798	17.038	12.5524
chr12	75851205	75852388	Intergenic	0.385903	127.74	ENSG00000139278	0.10099	105.992	98.8264
chr4	47073328	47074435	intron	0.385644	15.68	ENSG00000163288	0	0	0
chr7	27686646	27687656	intron	0.385507	18.1	ENSG00000106049	-0.0473932	25.1923	26.0336
chr14	34385870	34386869	Intergenic	0.385345	12.22	ENSG00000258897		0.256385	0
chr2	210736900	210737899	intron	0.385279	16.44	ENSG00000144406	0.163971	0.444096	0.396385
chr21	42217228	42218231	intron	0.385156	7.99	ENSG00000171587	0.168914	0.212912	0.189388
chr18	8106297	8107307	intron	0.385092	4.68	ENSG00000212067	0	0	0
chr18	43622336	43623335	intron	0.384859	23.83	ENSG00000152229	0.105664	14.2116	13.2079
chr4	125767235	125768234	Intergenic	0.384353	8.29	ENSG00000151458	-0.065016	6.33407	6.62605
chr6	134373226	134374225	promoter-TSS	0.384227	4.52	ENSG00000146411	0.0834877	1.16736	1.10173
chr1	84568561	84569681	intron	0.384003	5.13	ENSG00000142875	-0.0683769	7.5483	7.91467
chr6	13508876	13509875	Intergenic	0.383959	25.04	ENSG00000218265	0.972241	0.0266282	0.0135727
chr9	114727349	114728408	Intergenic	0.383944	49.47	ENSG00000222356	0	0	0
chr14	90904932	90905931	Intergenic	0.383768	5.73	ENSG00000258678	0	0	0
chr11	87056840	87057839	Intergenic	0.383507	7.84	ENSG00000254582	0.993367	0.0302063	0.0151727
chr3	41012957	41013972	Intergenic	0.383422	50.82	ENSG00000233096		0	0.0336077
chr9	89598199	89599480	intron	0.383108	65	ENSG00000231007	0.229556	0.563337	0.480469
chr16	89543392	89544582	intron	0.38304	8.6	ENSG00000167522	0.0594578	73.1706	70.2163
chr19	46762029	46763028	intron	0.383004	11.01	ENSG00000268238	0	0	0
chr19	7898470	7899469	intron	0.382767	3.62	ENSG00000142459	0.418339	3.23661	2.42191
chr11	13098411	13099444	Intergenic	0.382488	17.49	ENSG00000255558		0.0293999	0
chr1	201978170	201979181	Intergenic	0.382271	19.76	ENSG00000234678	0.405637	1.91251	1.44376
chr5	66700089	66701230	Intergenic	0.382095	10.86	ENSG00000239870	0	0	0
chr19	3450779	3451915	intron	0.381915	7.09	ENSG00000095932	0.349827	0.442578	0.347281
chr7	41085257	41086315	Intergenic	0.38189	8.14	ENSG00000224017		0.014063	0
chr1	87685982	87687027	intron	0.381704	10.41	ENSG00000224198	0	0	0
chr1	10588482	10589619	intron	0.381472	40.72	ENSG00000142655	0.00342022	16.7182	16.6786
chr4	5759992	5761036	intron	0.381444	42.98	ENSG00000072840	-0.0805958	3.4059	3.60159
chr6	138085274	138086325	Intergenic	0.38135	132.57	ENSG00000207300	0	0	0
chr1	87082470	87083469	Intergenic	0.381333	4.83	ENSG00000016602	-0.0725575	0.101608	0.106849
chr2	147939586	147940666	Intergenic	0.380959	40.87	ENSG00000238860	0	0	0
chr3	71150246	71151413	intron	0.38076	44.49	ENSG00000244203		0	0.0427973
chr6	32828774	32829775	Intergenic	0.380148	26.24	ENSG00000168394	0.125422	24.5128	22.4718
chr15	102177590	102178738	Intergenic	0.379766	23.83	ENSG00000184277	0.137895	28.8041	26.1784
chr4	111455036	111456105	intron	0.379457	49.92	ENSG00000199894	0	0	0
chr12	57560305	57561406	intron	0.379252	31.97	ENSG00000166888	0.144244	131.847	119.302
chr15	92104516	92105515	Intergenic	0.378737	9.35	ENSG00000258765	-0.0117025	1.76937	1.78378
chr22	39650037	39651161	Intergenic	0.378733	25.94	ENSG00000214854	0	0	0
chr2	235578317	235579335	Intergenic	0.378732	27.75	ENSG00000188042	0.038494	23.8088	23.1819
chrX	43870668	43871821	Intergenic	0.378485	2.87	ENSG00000214019	1.04797	0.0680237	0.0328995
chr13	47207144	47208143	intron	0.378463	4.52	ENSG00000136141	0.0460459	7.72805	7.48529
chr10	90967333	90968332	promoter-TSS	0.378284	3.17	ENSG00000138135	-1.33241	0.0707495	0.178164
chr4	22191986	22193041	Intergenic	0.378252	15.53	ENSG00000238383		0	7.16148
chr1	44240420	44242031	intron	0.37823	5.43	ENSG00000066135	-0.0302824	8.52299	8.70378
chr4	169615086	169616091	intron	0.378209	6.49	ENSG00000145439	-0.245677	16.9648	20.1143
chr13	97979843	97981017	intron	0.378089	17.04	ENSG00000202290	-0.16108	5.54756	6.20286
chr8	23655761	23656819	Intergenic	0.377907	18.85	ENSG00000271118	0	0	0
chr16	57047430	57048432	Intergenic	0.377826	4.98	ENSG00000140853	0.263083	13.4355	11.1959
chr16	29794868	29795971	Intergenic	0.377809	49.92	ENSG00000262756	-0.803497	0.00905581	0.0158054
chr18	61549358	61550433	Intergenic	0.377666	47.36	ENSG00000197632	1.07687	0.859429	0.407419
chr11	66912790	66913894	intron	0.377478	35.29	ENSG00000173120	0.0953794	105.985	99.205
chr17	41656161	41657212	Intergenic	0.377396	27.9	ENSG00000175832	0.107222	21.3115	19.7851
chr2	172873236	172874235	intron	0.377241	7.54	ENSG00000115840	-0.0239417	19.2751	19.5977
chr11	102365611	102366610	Intergenic	0.377221	58.67	ENSG00000152558	0.000495758	1736.22	1735.62
chr10	42983845	42984882	intron	0.377212	24.58	ENSG00000185904	0.129481	4.022	3.67675
chr1	220660270	220661281	Intergenic	0.377118	7.99	ENSG00000231529	0	0	0
chr19	2041729	2042940	intron	0.377003	40.72	ENSG00000133243	0.112138	103.472	95.7335
chr2	145769267	145770399	intron	0.376773	8.6	ENSG00000234940	0	0	0
chr16	20125072	20126071	Intergenic	0.376643	17.8	ENSG00000180269	0	0	0
chr13	40905437	40906592	Intergenic	0.376544	21.42	ENSG00000230058		0.0280267	0
chr11	72491840	72492894	intron	0.376431	11.76	ENSG00000186635	-0.0259451	93.7783	95.4801
chr3	171886696	171887695	intron	0.376251	9.2	ENSG00000075420	0.146051	61.2317	55.3364
chr11	67381261	67382298	intron	0.376241	25.04	ENSG00000231793	0.0806437	0.366405	0.346485
chr5	133888822	133889821	intron	0.376203	5.88	ENSG00000043143	0.0665622	19.3179	18.4469
chr2	159475417	159476435	intron	0.376031	20.51	ENSG00000204380	0.310917	1.08274	0.872831
chr10	35021233	35022294	intron	0.375788	14.48	ENSG00000148498	-0.00221294	28.303	28.3465
chr11	74517099	74518167	intron	0.375696	6.64	ENSG00000166439	0.257297	26.7803	22.4058
chr14	84293445	84294481	Intergenic	0.375696	21.57	ENSG00000258549	0	0	0
chr1	175165970	175167030	Intergenic	0.375618	44.79	ENSG00000235750	0.256438	21.108	17.6706
chr1	181220478	181221477	Intergenic	0.375433	46.9	ENSG00000179452	0	0	0
chr3	64147873	64149295	intron	0.375388	5.73	ENSG00000226017	-0.473475	0.335297	0.465543
chr18	43967379	43968433	intron	0.375278	41.02	ENSG00000141622	-0.335088	1.74954	2.20697
chr3	55674123	55675122	intron	0.375135	4.52	ENSG00000200238	0	0	0
chr1	160783128	160784127	exon	0.374915	5.28	ENSG00000226003	0	0	0
chr12	10328496	10329538	intron	0.374886	40.12	ENSG00000173391	0.861879	99.4928	54.7445
chr6	41863051	41864156	promoter-TSS	0.374872	21.27	ENSG00000137218	5.9875e-05	1.73926	1.73919
chr5	145407013	145408029	intron	0.374848	17.34	ENSG00000239317	0	0	0
chr11	8159618	8160617	intron	0.374722	7.69	ENSG00000166405	-0.293072	4.2561	5.21477
chr5	151087422	151088421	Intergenic	0.374722	13.72	ENSG00000113140	-0.603945	0.351466	0.534181
chr16	11302618	11303617	Intergenic	0.374642	10.56	ENSG00000263033	-1.2309	0.0167895	0.0394071
chr18	14189508	14190507	intron	0.374506	11.76	ENSG00000186481	-0.7017	0.0144931	0.0235719
chr4	166497286	166498285	Intergenic	0.373999	2.87	ENSG00000248327	0.178772	0.0162387	0.0143462
chr12	10902207	10903206	promoter-TSS	0.373762	12.07	ENSG00000235930	0	0	0
chr17	67565187	67566186	Intergenic	0.373762	4.52	ENSG00000227517	1.79236	0.0587071	0.0169487
chr3	143162381	143163495	intron	0.373381	57.61	ENSG00000240012	0	0	0
chr2	231602436	231603435	intron	0.373242	11.01	ENSG00000135932	-0.0211474	63.7237	64.6646
chr12	113772196	113773288	intron	0.373053	18.7	ENSG00000151176	0.0400063	13.304	12.9402
chr2	138879917	138880935	Intergenic	0.372864	67.57	ENSG00000224231	0	0	0
chr12	47308970	47309969	Intergenic	0.372852	6.64	ENSG00000139209	-0.548312	0.756423	1.10617
chr6	2846445	2847444	Intergenic	0.372805	14.03	ENSG00000021355	0.0598336	32.1237	30.8187
chr2	120550250	120551315	intron	0.372748	60.78	ENSG00000088179	-0.0655136	21.5257	22.5258
chr3	125630534	125631533	Intergenic	0.372639	9.35	ENSG00000221681	0	0	0
chr17	47080611	47081794	intron	0.372583	27.9	ENSG00000159217	0.197888	0.231776	0.202069
chr11	1146090	1147194	Intergenic	0.372519	53.69	ENSG00000215182	-0.143047	0.117707	0.129976
chr15	85950664	85951663	intron	0.372454	7.99	ENSG00000170776	-0.0556287	26.268	27.3006
chr12	110778220	110779219	exon	0.37214	14.33	ENSG00000264626	0	0	0
chr16	81110522	81111529	promoter-TSS	0.371958	14.78	ENSG00000140905	-0.0404029	73.5925	75.6826
chr14	71173270	71174331	intron	0.371958	54.14	ENSG00000258689	-0.789317	0.341847	0.5908
chr12	53759139	53760138	Intergenic	0.371751	6.79	ENSG00000185591	0.00377675	19.9054	19.8534
chr1	218570832	218571869	intron	0.37167	25.34	ENSG00000092969	0.152233	101.76	91.5698
chr3	28786734	28787733	intron	0.37154	5.58	ENSG00000228214	0.641105	0.0504398	0.0323431
chrX	71130684	71131779	intron	0.371334	2.41	ENSG00000196933	-0.0764761	2.92421	3.0834
chr6	126261574	126262925	Intergenic	0.371274	37.1	ENSG00000232131	0	0	0
chr12	90287739	90288754	Intergenic	0.371209	19.46	ENSG00000257725		0.0396398	0
chr14	33326032	33327119	Intergenic	0.371209	53.54	ENSG00000258580	0.41221	0.081755	0.0614366
chr6	46809924	46811106	Intergenic	0.371178	29.71	ENSG00000225730	0	0	0
chr9	99941449	99942458	Intergenic	0.371178	16.29	ENSG00000197816	-0.251026	1.3087	1.55742
chr21	36167802	36169231	intron	0.371089	10.56	ENSG00000211590	0	0	0
chr9	22041286	22042458	intron	0.37103	11.61	ENSG00000147883	0.706843	5.54834	3.39924
chr2	190151636	190152916	Intergenic	0.370056	13.57	ENSG00000213601	-0.0277595	0.0306459	0.0312413
chr5	90461772	90462779	Intergenic	0.369712	10.41	ENSG00000176018	0.128993	11.1656	10.2106
chr6	82854001	82855056	Intergenic	0.369531	13.57	ENSG00000005700	-0.0584477	13.5433	14.1033
chr4	113668037	113669105	Intergenic	0.36934	26.54	ENSG00000202536	0	0	0
chr8	19436133	19437132	intron	0.36934	5.43	ENSG00000253270	0	0	0
chr18	7626729	7627833	intron	0.36934	10.86	ENSG00000173482	0.112928	13.3664	12.36
chr21	43513876	43514875	intron	0.36934	9.2	ENSG00000177398		0.00746949	0
chr2	146450386	146451385	Intergenic	0.368829	10.26	ENSG00000226218	0	0	0
chr5	17160339	17161371	intron	0.368451	30.46	ENSG00000176788	0.146021	196.41	177.503
chr1	197807432	197808519	Intergenic	0.368281	7.84	ENSG00000207139	0	0	0
chr12	76077846	76078845	Intergenic	0.368281	21.27	ENSG00000198923	0	0	0
chr9	118453099	118454244	Intergenic	0.368276	49.32	ENSG00000228714	0	0	0
chr3	11292814	11293933	intron	0.36731	7.69	ENSG00000213964	0.341893	2.56942	2.02728
chr1	246750811	246751810	intron	0.367196	3.77	ENSG00000162852	0.0220554	6.08022	5.98797
chrX	6243334	6244333	Intergenic	0.367124	2.11	ENSG00000229818	0	0	0
chr4	87935456	87936485	intron	0.366782	2.87	ENSG00000163633	0.0984303	4.32758	4.04217
chr6	146865726	146866773	intron	0.366639	1.66	ENSG00000118508	-0.0246714	21.2968	21.6641
chr20	6748293	6749323	promoter-TSS	0.366586	1.81	ENSG00000125845	1.19345	5.21276	2.27931
chr16	47071422	47072421	Intergenic	0.366526	5.28	ENSG00000259821	0	0	0
chr6	150739676	150740745	Intergenic	0.36652	5.88	ENSG00000220598	0	0	0
chr3	4782846	4783872	intron	0.366451	21.57	ENSG00000235947	0.459296	0.138364	0.100638
chrX	107265518	107266629	Intergenic	0.366163	8.14	ENSG00000101842	0.363432	1.34396	1.04468
chr10	107018130	107019129	intron	0.365683	3.62	ENSG00000226387	0	0	0
chr2	171381536	171382535	intron	0.365578	8.75	ENSG00000213981	-0.00234406	0.187836	0.188142
chr8	17583568	17584669	intron	0.365167	4.52	ENSG00000129422	-0.00503323	13.5238	13.571
chr9	109608961	109610030	Intergenic	0.365027	43.74	ENSG00000212276	0	0	0
chr12	98002707	98003706	Intergenic	0.365013	22.32	ENSG00000251844	0	0	0
chr4	119771492	119772491	5'	0.365013	2.87	ENSG00000150961	-0.0365716	11.0712	11.3555
chr5	52693430	52694480	Intergenic	0.36484	8.45	ENSG00000240052		0.0332502	0
chr19	47713941	47715028	TTS	0.364764	4.22	ENSG00000130749	0.0633455	11.081	10.605
chr16	10678472	10679471	Intergenic	0.364676	11.46	ENSG00000213853	0.104196	26.7382	24.8752
chr8	42065506	42066517	promoter-TSS	0.364666	9.2	ENSG00000104368	0.298268	162.929	132.498
chr20	48853774	48854773	Intergenic	0.364319	74.96	ENSG00000224397	-0.224491	0.140775	0.164477
chr15	67305790	67306869	Intergenic	0.364236	22.62	ENSG00000256122	0	0	0
chr1	10555532	10556610	intron	0.36397	13.42	ENSG00000142655	0.00342022	16.7182	16.6786
chr1	44456882	44457910	TTS	0.363842	8.9	ENSG00000159214	0.337031	4.0305	3.19082
chr17	64606161	64607244	intron	0.363812	12.37	ENSG00000264630		0	0.0380551
chr11	18552199	18553289	TTS	0.363384	10.41	ENSG00000074319	0.058169	69.7483	66.992
chr5	150419522	150420529	intron	0.363337	11.46	ENSG00000211445	1.753	2.41008	0.715036
chr3	122822996	122823995	intron	0.362816	7.39	ENSG00000065485	0.243532	35.1012	29.6491
chr3	99307446	99308445	intron	0.362232	42.68	ENSG00000244464		0	0.00316951
chr20	34360343	34361423	intron	0.362174	17.8	ENSG00000025293	0.12656	17.6384	16.157
chr14	63937770	63938781	intron	0.362156	13.42	ENSG00000154001	-0.0140374	31.3674	31.6741
chr2	57947636	57948635	Intergenic	0.362156	9.35	ENSG00000271615	0	0	0
chr10	52166580	52167594	intron	0.361858	19.15	ENSG00000225303	0	0	0
chr14	61946519	61947518	intron	0.361658	28.2	ENSG00000182107	0.0442987	25.7077	24.9303
chr12	52364846	52365869	intron	0.361587	8.14	ENSG00000135503	-0.0944707	7.112	7.5933
chr10	60015630	60016759	intron	0.361456	28.66	ENSG00000151151	-0.0285463	1.21821	1.24256
chr1	177046820	177048080	intron	0.361387	8.45	ENSG00000152092	0	0	0
chr11	14467945	14469167	Intergenic	0.361205	35.89	ENSG00000251991	0	0	0
chr6	25312276	25313323	intron	0.361154	26.39	ENSG00000079691	-0.0280354	7.37754	7.52231
chr4	177967935	177968934	Intergenic	0.360828	9.35	ENSG00000222859	0	0	0
chr2	213727686	213728685	Intergenic	0.360618	11.76	ENSG00000223373		0.0170608	0
chr9	72048131	72049130	intron	0.360576	83.1	ENSG00000229312	0.600395	0.0933461	0.0615686
chr18	55869208	55870207	intron	0.360507	5.13	ENSG00000049759	0.0952325	130.747	122.395
chr6	138152746	138153756	intron	0.360284	68.47	ENSG00000118503	2.2172	238.799	51.3557
chr9	21615545	21616598	Intergenic	0.360226	9.05	ENSG00000227443	0	0	0
chr6	2817995	2819023	Intergenic	0.360143	25.79	ENSG00000021355	0.0598336	32.1237	30.8187
chr15	58860408	58861513	exon	0.360072	35.74	ENSG00000128918	-1.74052	0.128785	0.430345
chrX	80376051	80377121	intron	0.359952	1.06	ENSG00000131171	-0.0968754	9.29362	9.93911
chr2	1720286	1721365	intron	0.359885	13.72	ENSG00000130508	0.0610815	0.748813	0.717771
chr13	44934368	44935393	Intergenic	0.359882	11.46	ENSG00000151778	0	0	0
chr1	244005820	244006819	intron	0.359816	10.41	ENSG00000117020	-0.0793486	22.5855	23.8625
chr7	123486096	123487156	intron	0.359494	9.2	ENSG00000106302	-0.487876	0.250149	0.350804
chr20	13311843	13312873	Intergenic	0.359447	16.89	ENSG00000101230	0.0476587	0.555466	0.537416
chr5	57087222	57088221	Intergenic	0.359242	3.62	ENSG00000249198	-1.00663	0.0208012	0.0417942
chr21	38729732	38730774	Intergenic	0.358983	13.72	ENSG00000157540	0.0789041	11.9725	11.3353
chr11	10476740	10477748	promoter-TSS	0.358838	6.94	ENSG00000221574	0	0	0
chr14	58747982	58748981	intron	0.358687	5.28	ENSG00000139971	0.86406	0.723744	0.397628
chr12	52426639	52427638	intron	0.358597	7.84	ENSG00000123358	0.96499	7.67573	3.93214
chr12	77497689	77498688	Intergenic	0.358069	4.68	ENSG00000165891	-0.0428198	19.2118	19.7905
chr15	90041364	90042363	Intergenic	0.358042	38.16	ENSG00000140519	-0.0832408	0.234566	0.248499
chr2	85121467	85122635	Intergenic	0.358033	24.43	ENSG00000186854	0.0259296	15.0789	14.8103
chr4	101269242	101270385	Intergenic	0.358031	7.84	ENSG00000145358	0.0874677	0.579698	0.545596
chr3	195273096	195274180	Intergenic	0.358027	21.72	ENSG00000223711	-0.458721	0.204516	0.281071
chr5	95237322	95238321	intron	0.358027	7.99	ENSG00000153113	0.0204	190.497	187.744
chr8	23154333	23155332	3'	0.358007	4.07	ENSG00000253837	0.15029	7.37626	6.64652
chr6	31908151	31909244	intron	0.357934	40.57	ENSG00000204366	-0.106383	2.27105	2.44484
chr9	111869661	111870660	intron	0.357619	7.69	ENSG00000106771	-0.00853428	41.1905	41.4349
chr1	17879920	17881231	intron	0.357195	30.01	ENSG00000074964	-0.185581	1.67333	1.90303
chr15	75358258	75359413	Intergenic	0.357147	6.49	ENSG00000138621	0.0376344	12.6269	12.3018
chr6	82660307	82661306	Intergenic	0.356983	3.77	ENSG00000226453	0.491892	0.426346	0.303171
chr5	127270571	127271721	Intergenic	0.356843	62.89	ENSG00000245937	0.140477	14.4409	13.1011
chr16	70838633	70839632	Intergenic	0.356074	4.52	ENSG00000221725	0	0	0
chr7	124881566	124882565	intron	0.356074	4.52	ENSG00000128513	-0.206714	18.8084	21.7059
chr3	142364096	142365113	intron	0.355875	9.8	ENSG00000120756	-0.00869581	37.5555	37.7825
chr1	103406782	103408069	intron	0.355813	32.73	ENSG00000230864	0	0	0
chr13	20419844	20420843	intron	0.355253	9.65	ENSG00000132950	-0.0416469	15.4002	15.8513
chr15	99365816	99366838	intron	0.355236	9.95	ENSG00000140443	0.222621	63.0574	54.0406
chr7	9447396	9448395	Intergenic	0.355215	6.33	ENSG00000264766	0	0	0
chr17	53498411	53499412	intron	0.355198	13.27	ENSG00000108960	0.249413	5.64197	4.74624
chr4	113206136	113207241	intron	0.355092	42.38	ENSG00000073331	0.47192	6.86223	4.9477
chr6	138128895	138130073	Intergenic	0.354902	56.1	ENSG00000118503	2.2172	238.799	51.3557
chr15	92485390	92486438	intron	0.354838	49.02	ENSG00000176463	0.105824	30.8669	28.6838
chr12	24872146	24873145	Intergenic	0.354822	18.1	ENSG00000240481	0	0	0
chr16	67571280	67572282	intron	0.354802	14.93	ENSG00000259945	0.250496	17.1345	14.4034
chr2	113593267	113594485	intron	0.354679	15.38	ENSG00000125538	1.8533	129.449	35.826
chr12	95511055	95512088	intron	0.354616	6.49	ENSG00000237774	0	0	0
chr1	113584770	113585831	intron	0.354546	22.02	ENSG00000238198	0.151463	0.359332	0.32352
chr10	28031195	28032234	intron	0.354359	4.68	ENSG00000150051	0.804588	0.132163	0.0756667
chr19	11642966	11643986	Intergenic	0.354281	12.22	ENSG00000130159	0.244014	47.9352	40.4762
chr18	33966108	33967233	intron	0.35423	28.66	ENSG00000134775	-0.023266	23.0803	23.4555
chr8	70693461	70694532	intron	0.354171	9.8	ENSG00000137571	-0.44727	0.0915289	0.124796
chr17	57074811	57075810	TTS	0.354152	4.68	ENSG00000224738	0.400686	1.12006	0.848443
chr3	30440596	30441595	Intergenic	0.354152	3.47	ENSG00000199927		0.232825	0
chr1	44514120	44515119	Intergenic	0.353746	3.32	ENSG00000230615	-1.19876	0.0221348	0.0508085
chr12	121628039	121629104	Intergenic	0.353624	25.34	ENSG00000261827	0.71688	0.0812038	0.0494053
chr20	6593861	6594860	Intergenic	0.353561	4.37	ENSG00000228482		0	0.0275389
chr4	48803586	48804591	Intergenic	0.353403	18.25	ENSG00000109180	0.0492127	130.47	126.094
chr19	40447370	40448369	Intergenic	0.353104	39.06	ENSG00000187534	0.135389	45.9944	41.8744
chr2	223603400	223604399	Intergenic	0.35297	4.22	ENSG00000235225	0.34265	1.33702	1.05437
chr10	49518495	49519932	intron	0.352879	4.83	ENSG00000107643	-0.0548719	43.3991	45.0816
chr15	67248408	67249439	Intergenic	0.352852	70.43	ENSG00000259289	0.972241	0.0304013	0.015496
chr12	66078189	66079595	Intergenic	0.352817	10.56	ENSG00000213344	1.53713	0.782593	0.269659
chr15	88359714	88360713	Intergenic	0.352626	14.03	ENSG00000260305	0	0	0
chr4	75397436	75398435	Intergenic	0.352477	8.75	ENSG00000205595	0.604624	40.1877	26.4291
chr1	113577720	113578781	intron	0.352017	8.29	ENSG00000236066	1.64924	0.123121	0.039252
chr5	57207422	57208429	Intergenic	0.352003	3.77	ENSG00000249584	-0.219353	0.00789062	0.00918635
chr6	45131746	45132756	intron	0.351924	21.57	ENSG00000124813	0.0245217	2.85934	2.81115
chr2	106472572	106473571	intron	0.351918	26.39	ENSG00000235522	0.0201499	12.8283	12.6503
chr8	118959068	118960069	intron	0.350858	18.1	ENSG00000182197	0.0824172	142.077	134.188
chr3	57102323	57103545	intron	0.350732	34.08	ENSG00000163947	0.00455932	5.05022	5.03428
chr3	10246846	10247922	intron	0.350619	28.5	ENSG00000134070	1.27092	9.93838	4.11841
chr6	143163326	143164395	intron	0.350604	19.46	ENSG00000233138	1.71688	0.153968	0.046838
chr8	49502283	49503317	intron	0.350488	15.08	ENSG00000233858	-0.919982	0.00227968	0.00431335
chr2	127984066	127985099	Intergenic	0.350256	72.69	ENSG00000186684	0.140868	2.32773	2.11118
chr8	39770256	39771410	promoter-TSS	0.350035	7.99	ENSG00000131203	0.275266	3.11304	2.5723
chr3	171580684	171581683	Intergenic	0.349928	18.25	ENSG00000186329	-0.0396978	1.98332	2.03865
chr6	12148476	12149475	intron	0.349804	6.33	ENSG00000095951	0.189382	5.79808	5.0848
chr7	84106820	84107965	Intergenic	0.3498	58.21	ENSG00000075213	0.0768372	114.778	108.825
chr5	121304572	121305588	intron	0.349706	42.83	ENSG00000151304	0.0811433	11.9115	11.2601
chr2	173860286	173861285	intron	0.349606	26.39	ENSG00000228016	0	0	0
chr12	66212064	66213138	intron	0.349441	16.74	ENSG00000149948	0.240055	69.7602	59.0669
chr1	7462020	7463031	intron	0.349211	27.3	ENSG00000225126	0	0	0
chr12	70725805	70726838	intron	0.348955	8.29	ENSG00000257241	0	0	0
chr10	127779130	127780429	intron	0.348537	9.35	ENSG00000213170	-1.12312	0.0171374	0.0373282
chr9	116986981	116987980	intron	0.348326	4.22	ENSG00000196739	0.147248	16.7336	15.11
chr10	90466830	90467929	Intergenic	0.348121	48.26	ENSG00000271408	0	0	0
chr14	103557357	103558356	Intergenic	0.347489	6.79	ENSG00000259444		0.0371199	0
chr12	3278296	3279438	intron	0.347444	4.37	ENSG00000011105	0.0195717	9.69083	9.56025
chr3	180024157	180025156	Intergenic	0.347302	25.04	ENSG00000239880	-0.118613	0.332324	0.360801
chr8	43108020	43109217	Intergenic	0.347222	6.33	ENSG00000253186	0	0	0
chr7	53450370	53451515	Intergenic	0.346891	7.24	ENSG00000199629	0	0	0
chr1	47655861	47656860	promoter-TSS	0.346691	34.24	ENSG00000162366	0.121937	37.8455	34.7782
chr15	85535390	85536389	intron	0.346655	16.29	ENSG00000073417	0.0559733	34.3432	33.0363
chr3	66522807	66523806	intron	0.34645	11.31	ENSG00000144749	-0.218348	3.65811	4.25584
chr22	37702662	37703661	intron	0.346232	53.39	ENSG00000100055	-0.299061	0.222825	0.274151
chr4	159440136	159441141	Intergenic	0.346121	24.58	ENSG00000249901	0	0	0
chr12	89574639	89575638	Intergenic	0.346105	8.75	ENSG00000238302	0	0	0
chr6	143159407	143160573	intron	0.346097	29.86	ENSG00000233138	1.71688	0.153968	0.046838
chr9	135144981	135146048	intron	0.345858	4.98	ENSG00000221105	0	0	0
chr10	125828680	125829679	intron	0.345841	5.28	ENSG00000182022	0.151675	11.8167	10.6375
chr17	17290661	17291676	Intergenic	0.345815	11.01	ENSG00000215030	-0.0117553	340.496	343.281
chr1	97025511	97026531	Intergenic	0.345532	22.02	ENSG00000241992	-1.54177	0.0683152	0.198901
chr4	72978142	72979184	intron	0.345508	63.49	ENSG00000056291	-0.00202442	0.0160571	0.0160797
chr15	42349289	42350289	Intergenic	0.345357	33.33	ENSG00000188089	1.03865	0.0242109	0.0117854
chr8	116004570	116005569	Intergenic	0.345344	30.62	ENSG00000253756	-0.507382	0.28671	0.407549
chr11	76596045	76597089	intron	0.344785	59.57	ENSG00000078124	0.0456333	63.1062	61.1413
chr2	157323167	157324185	intron	0.344749	9.35	ENSG00000115159	-0.0983761	55.4691	59.3834
chr18	53966058	53967096	Intergenic	0.344648	29.86	ENSG00000201816	0	0	0
chr9	87387509	87388548	intron	0.344087	12.22	ENSG00000148053	0.746934	0.0439798	0.0262062
chr2	187439672	187440866	Intergenic	0.343704	52.33	ENSG00000138448	0.18296	87.1733	76.7905
chr11	34197211	34198210	intron	0.343367	38.76	ENSG00000201867	0	0	0
chr18	20143208	20144207	Intergenic	0.342828	4.83	ENSG00000239490	0.993367	0.0238392	0.0119746
chr8	24062306	24063317	Intergenic	0.342665	19.76	ENSG00000253891	0	0	0
chrX	41097680	41098717	Intergenic	0.342585	1.36	ENSG00000270155	0.171818	0.137896	0.122414
chr20	50618036	50619035	Intergenic	0.342498	25.49	ENSG00000263659	-0.362115	0.326364	0.419479
chr4	169525606	169526635	intron	0.342401	23.53	ENSG00000129116	0.0194617	114.354	112.822
chr2	164651050	164652049	Intergenic	0.342264	19.76	ENSG00000226847	0	0	0
chr4	189862535	189863534	Intergenic	0.342253	8.6	ENSG00000250024	0	0	0
chr7	18395566	18396565	intron	0.342096	6.94	ENSG00000048052	0.272628	31.0185	25.6774
chr8	134654211	134655232	Intergenic	0.342096	67.11	ENSG00000212273	0	0	0
chr6	134609495	134610494	intron	0.34201	13.88	ENSG00000118515	1.60842	47.461	15.5652
chr22	20880538	20881537	intron	0.341585	33.18	ENSG00000099917	0.0790384	124.663	118.017
chr5	142534072	142535138	intron	0.341226	23.23	ENSG00000226272		0.0145616	0
chr18	23806329	23807383	promoter-TSS	0.341207	9.35	ENSG00000141384	0.055872	3.06195	2.94564
chr4	159456206	159457436	intron	0.340672	5.28	ENSG00000249901	0	0	0
chr4	19989056	19990285	Intergenic	0.340589	18.1	ENSG00000250611	0	0	0
chr1	246891720	246892781	intron	0.340571	47.81	ENSG00000143653	-0.0212468	19.8184	20.1124
chr22	42077988	42078987	5'	0.340516	4.83	ENSG00000184208	0.106944	2.1701	2.01505
chr15	81615240	81616438	promoter-TSS	0.340178	17.49	ENSG00000172345	0.59235	6.198	4.11089
chr19	17132529	17133590	intron	0.340018	57.01	ENSG00000160111	0.383884	0.199413	0.152824
chr10	118733635	118734729	intron	0.339865	16.59	ENSG00000188316	-0.452291	0.259719	0.355351
chr3	136638046	136639122	intron	0.339759	20.51	ENSG00000158092	-0.021972	40.7249	41.3499
chr15	83979466	83980569	Intergenic	0.339321	22.17	ENSG00000166503	-0.103704	45.2223	48.5927
chr13	90059344	90060343	Intergenic	0.339285	9.2	ENSG00000225530	-0.369027	0.121548	0.156977
chr1	47496170	47497231	intron	0.33927	13.72	ENSG00000259832	0	0	0
chr3	181500064	181501083	Intergenic	0.339256	112.81	ENSG00000199839	0	0	0
chr1	186544282	186546210	Intergenic	0.339238	17.49	ENSG00000228238	-1.12312	0.00813733	0.0177245
chr6	136242976	136244023	intron	0.339206	14.18	ENSG00000171408	-1.37642	0.0190327	0.0494133
chr9	119632109	119633108	intron	0.338966	15.38	ENSG00000119401	0.00246415	6.96766	6.95576
chr8	39800011	39801010	intron	0.338725	63.04	ENSG00000131203	0.275266	3.11304	2.5723
chr6	47094245	47095244	Intergenic	0.338664	7.84	ENSG00000153292	0.0712163	74.9355	71.3263
chr2	173390267	173391285	Intergenic	0.338139	40.72	ENSG00000091409	-0.0515889	306.619	317.781
chr19	51013937	51014940	promoter-TSS	0.33802	4.22	ENSG00000161677	0.296548	4.95568	4.0349
chr6	235726	236725	Intergenic	0.337716	4.07	ENSG00000263667		0.00359172	0
chr10	3929895	3930984	Intergenic	0.337615	25.19	ENSG00000226005	0	0	0
chr1	223913970	223914981	intron	0.337482	50.22	ENSG00000162909	0.0433751	370.939	359.953
chr10	128072230	128073284	intron	0.337462	26.54	ENSG00000148848	-0.185775	11.9216	13.5599
chr4	79096936	79098255	intron	0.337255	28.81	ENSG00000138759	-0.0225837	9.26319	9.40933
chr22	41398262	41399261	Intergenic	0.337178	2.56	ENSG00000172404	-0.0840397	0.525082	0.556577
chr4	74563756	74564785	Intergenic	0.336964	20.06	ENSG00000228277	1.09851	0.0387742	0.0181075
chr8	11747720	11748760	Intergenic	0.336925	1.51	ENSG00000255144	0	0	0
chr2	208203217	208204216	Intergenic	0.336623	6.49	ENSG00000118260	0.170175	42.6837	37.9344
chr3	111635496	111636522	intron	0.336501	10.86	ENSG00000240766	1.13071	0.61771	0.282102
chr15	57260789	57261788	intron	0.336486	7.54	ENSG00000140262	0.0916555	35.7723	33.5703
chr6	143167024	143168075	intron	0.336395	20.06	ENSG00000233138	1.71688	0.153968	0.046838
chr9	26243195	26244348	Intergenic	0.336327	16.59	ENSG00000270683	0	0	0
chr7	94681	95706	Intergenic	0.336194	7.69	ENSG00000242611	-0.0240128	0.0933907	0.0949581
chr12	76093205	76094319	Intergenic	0.335889	7.99	ENSG00000198923	0	0	0
chr17	78874611	78875610	intron	0.335644	29.56	ENSG00000232083	0.874245	0.083564	0.0455874
chr4	119512442	119513485	promoter-TSS	0.335429	2.56	ENSG00000223225	0	0	0
chr3	171847423	171848433	intron	0.335234	43.43	ENSG00000075420	0.146051	61.2317	55.3364
chr18	67711647	67712685	intron	0.335199	23.53	ENSG00000150637	1.39554	0.142834	0.0542913
chr15	92554690	92555738	intron	0.334965	5.73	ENSG00000176463	0.105824	30.8669	28.6838
chr5	133598172	133599238	Intergenic	0.334441	51.58	ENSG00000006837	0.323305	1.35212	1.08067
chr6	160113895	160115000	promoter-TSS	0.334198	5.73	ENSG00000120437	-0.0655831	25.8021	27.0021
chr18	20397429	20398428	Intergenic	0.334025	15.99	ENSG00000101773	0.197632	50.7843	44.2829
chr5	52598422	52599421	Intergenic	0.333906	11.61	ENSG00000213940	0	0	0
chr11	120271190	120272239	intron	0.333885	20.96	ENSG00000196914	-0.0541283	16.9227	17.5696
chr1	177052428	177053427	intron	0.333865	50.37	ENSG00000152092	0	0	0
chr10	11704280	11705334	Intergenic	0.333641	13.72	ENSG00000271046	-0.0529241	0.229926	0.238517
chr5	131836839	131837838	Intergenic	0.333636	4.83	ENSG00000125347	1.16223	51.2904	22.9176
chr7	17314581	17315706	Intergenic	0.333481	18.55	ENSG00000106546	0.22695	34.5478	29.519
chr11	19736845	19737844	intron	0.333404	25.79	ENSG00000166833	0.132	10.5716	9.64731
chrX	43514022	43515050	5'	0.333082	1.66	ENSG00000189221	-0.0325621	5.79498	5.92726
chr11	19735040	19736039	non-coding	0.333073	3.62	ENSG00000166833	0.132	10.5716	9.64731
chr11	119461190	119462194	Intergenic	0.333064	6.33	ENSG00000230716	-0.605048	0.0178497	0.02715
chr15	59992266	59993265	Intergenic	0.333064	11.01	ENSG00000140299	0.0542037	67.4954	65.0065
chr2	230319567	230320585	intron	0.333032	23.53	ENSG00000235993	0	0	0
chr4	80998535	80999534	Intergenic	0.332965	4.37	ENSG00000163297	0.116344	30.8049	28.4182
chr4	73391087	73392205	intron	0.332917	25.64	ENSG00000156140	0.0893371	6.10211	5.7357
chr7	155636531	155637542	Intergenic	0.332886	7.84	ENSG00000221113	0	0	0
chr6	116355201	116356275	intron	0.332682	29.71	ENSG00000111816	0.0185928	2.78761	2.75191
chr11	21582640	21583639	intron	0.332467	7.39	ENSG00000201059	0	0	0
chr3	122162446	122163480	TTS	0.332079	53.84	ENSG00000270901		0	0.161142
chr10	91096945	91098079	intron	0.331952	5.28	ENSG00000107798	0.00256681	64.5218	64.4071
chr12	70132446	70133488	promoter-TSS	0.331937	11.76	ENSG00000111596	0.0987387	59.9488	55.9831
chr12	46068005	46069069	Intergenic	0.331744	12.97	ENSG00000189079	0.0250248	6.55211	6.43943
chrX	45617472	45618517	Intergenic	0.331568	7.84	ENSG00000207725	0	0	0
chr3	30585696	30586772	Intergenic	0.331413	20.51	ENSG00000227549	0	0	0
chr2	37571586	37572585	intron	0.331352	10.56	ENSG00000115828	0.115833	13.4064	12.3721
chr9	26325611	26326658	Intergenic	0.331118	2.71	ENSG00000266429		34.2236	0
chr2	232151867	232152885	intron	0.33093	3.47	ENSG00000135931	-0.0269809	6.10448	6.21972
chr12	9820139	9821138	Intergenic	0.330566	22.77	ENSG00000256442		0.0847762	0
chr1	230340511	230341510	intron	0.330499	15.99	ENSG00000224407	0.0293768	74.3853	72.886
chr10	129775435	129776544	intron	0.330351	11.46	ENSG00000132334	-0.120159	3.7264	4.05006
chr10	79342580	79343579	intron	0.330351	3.32	ENSG00000156113	0.388332	0.483225	0.36919
chrX	13686472	13687550	Intergenic	0.330033	20.21	ENSG00000176896	-0.394498	0.411473	0.540875
chr9	32384395	32385398	intron	0.329905	7.24	ENSG00000122729	0.0356027	30.8788	30.1261
chr16	19822392	19823532	intron	0.329869	112.81	ENSG00000103550	-0.00782793	27.8788	28.0305
chr9	101543959	101544958	intron	0.329779	9.95	ENSG00000165138	-0.171563	7.62415	8.58691
chr6	113367676	113368873	Intergenic	0.329408	42.53	ENSG00000218490		0.0244079	0
chr20	52796374	52797373	Intergenic	0.329114	42.23	ENSG00000019186	0.139115	217.403	197.419
chr10	66119435	66120594	Intergenic	0.329033	50.82	ENSG00000235489	-0.0904148	4.37434	4.65726
chr3	71158364	71159595	intron	0.32892	32.43	ENSG00000244203		0	0.0427973
chr1	231530782	231531960	intron	0.328875	35.89	ENSG00000135766	0.0986653	24.4667	22.8493
chr4	189075735	189076734	Intergenic	0.328485	11.91	ENSG00000248370	0	0	0
chr8	64132361	64133369	Intergenic	0.328197	4.83	ENSG00000261542	-0.420883	0.148444	0.198729
chr7	127755246	127756245	Intergenic	0.328121	4.52	ENSG00000128594	0.182692	1.69824	1.49625
chr8	94923956	94924955	Intergenic	0.328036	24.58	ENSG00000264448	0.129355	0.382784	0.349957
chr12	11857920	11858919	intron	0.327997	11.91	ENSG00000139083	0.0630221	7.42135	7.10414
chr18	60104608	60105607	Intergenic	0.327952	6.94	ENSG00000266920	0	0	0
chr11	126210840	126212044	TTS	0.327935	29.86	ENSG00000254905	-0.402967	1.46709	1.93982
chr6	126244996	126246006	intron	0.32766	5.13	ENSG00000232131	0	0	0
chr17	37056661	37057660	intron	0.32752	12.52	ENSG00000263466	-0.517325	0.199501	0.285546
chr17	63023561	63024644	intron	0.32752	19.61	ENSG00000266598		0.0231459	0
chr3	67980557	67981556	intron	0.32752	23.53	ENSG00000183662	0	0	0
chrX	131134618	131135679	Intergenic	0.32752	10.26	ENSG00000265686	0	0	0
chr1	223167732	223168769	exon	0.327398	26.39	ENSG00000239054	0	0	0
chr21	16250128	16251331	Intergenic	0.327153	49.02	ENSG00000226406		0.0210684	0
chr22	38708737	38709799	intron	0.32715	5.43	ENSG00000265311	0	0	0
chr5	71403522	71404521	intron	0.327138	2.11	ENSG00000131711	-0.00721113	2.81838	2.8325
chr1	202032970	202034031	Intergenic	0.327043	10.56	ENSG00000235811	0	0	0
chr5	114684681	114685680	Intergenic	0.327007	8.29	ENSG00000249026	-1.01798	0.00564776	0.0114372
chr16	8845483	8846482	intron	0.326872	12.97	ENSG00000140650	-0.0345513	55.3442	56.6857
chr5	14098130	14099171	Intergenic	0.32636	82.35	ENSG00000038382	0.0666562	172.3	164.52
chr10	157830	158932	Intergenic	0.326336	10.71	ENSG00000015171	-0.095258	22.3326	23.857
chr8	58510220	58511219	Intergenic	0.326336	38.61	ENSG00000254139	-1.2309	0.00293653	0.0068924
chr8	124529068	124530132	intron	0.326218	33.78	ENSG00000156804	0.384651	11.8445	9.07244
chr6	139235651	139236650	intron	0.325638	1.66	ENSG00000135597	-0.196782	29.9458	34.3221
chr17	70386084	70387083	Intergenic	0.325552	6.03	ENSG00000243514	0.71688	0.117357	0.0714016
chr1	9731278	9732381	intron	0.325535	9.2	ENSG00000171608	0.621298	2.98343	1.93948
chr6	30495374	30496375	Intergenic	0.325507	69.53	ENSG00000235781	0.384329	0.175505	0.134461
chr9	99482545	99483544	Intergenic	0.325416	3.32	ENSG00000233820		0	0.0210382
chr17	36620777	36621860	intron	0.325218	2.26	ENSG00000225485	0.0330135	53.6003	52.3877
chr10	119412083	119413109	Intergenic	0.325158	16.74	ENSG00000235198	0	0	0
chr12	68221305	68222306	Intergenic	0.324879	58.67	ENSG00000255970	0.584765	0.0528035	0.0352072
chr7	6765146	6766192	Intergenic	0.32483	24.43	ENSG00000187953	-0.0540323	8.55259	8.87898
chr2	145753586	145754585	intron	0.324761	8.29	ENSG00000234940	0	0	0
chr6	28945146	28946156	Intergenic	0.324536	20.36	ENSG00000263426	0	0	0
chr1	177474920	177475919	Intergenic	0.324494	13.88	ENSG00000227579	0	0	0
chr3	193109564	193110583	Intergenic	0.324394	52.63	ENSG00000225473		0	0.013226
chr14	102738219	102739218	intron	0.324349	15.23	ENSG00000080823	-0.277706	14.9404	18.1117
chr20	6698874	6699873	Intergenic	0.323929	6.64	ENSG00000228482		0	0.0275389
chr17	33580411	33581444	intron	0.323779	9.95	ENSG00000166750	0.413021	22.4982	16.8972
chr4	20195785	20196827	Intergenic	0.323636	33.93	ENSG00000145147	-0.0221582	4.1746	4.23921
chr16	28192433	28193432	intron	0.3234	11.91	ENSG00000169180	-0.00513088	257.394	258.311
chr6	3337545	3338650	intron	0.323353	17.65	ENSG00000180822	-0.0424507	16.2558	16.7412
chr14	49031445	49032531	Intergenic	0.323239	6.03	ENSG00000251731	0	0	0
chr1	59612481	59613569	promoter-TSS	0.323132	31.52	ENSG00000224609		0.04569	0
chr2	28506286	28507285	intron	0.323072	3.77	ENSG00000171174	0.00858003	0.924538	0.919056
chr21	30580628	30581631	intron	0.322289	6.18	ENSG00000156273	0.436522	14.3542	10.6065
chr1	64688911	64689910	intron	0.322202	7.69	ENSG00000177414	0	0	0
chr6	134700274	134701306	Intergenic	0.322202	25.64	ENSG00000213118	0	0	0
chr19	37825279	37826278	intron	0.322086	1.51	ENSG00000181666	0.066017	7.27721	6.95171
chr1	172897631	172898669	Intergenic	0.322054	39.51	ENSG00000120337	0.825619	28.6476	16.1641
chr11	32728490	32729544	intron	0.322009	72.09	ENSG00000186714	-0.0424869	10.6348	10.9527
chr19	47730087	47731090	promoter-TSS	0.321982	40.57	ENSG00000105327	1.70267	4.13742	1.27109
chr11	60691599	60692839	intron	0.321823	11.16	ENSG00000006118	0.195713	116.232	101.487
chr18	71230436	71231496	Intergenic	0.32179	9.8	ENSG00000265380	0	0	0
chrX	30922280	30923383	Intergenic	0.321765	11.61	ENSG00000157625	0.197489	5.92901	5.1705
chr14	94801195	94802231	Intergenic	0.321468	22.62	ENSG00000170099	2.64203	0.104374	0.016721
chr17	6916127	6917283	non-coding	0.321139	7.09	ENSG00000215067	0.387485	3.30287	2.52491
chr5	74897639	74898771	Intergenic	0.321118	77.52	ENSG00000113163	-0.038203	21.4976	22.0745
chr3	106252564	106253683	Intergenic	0.321087	36.35	ENSG00000200610	0	0	0
chr11	118809161	118810339	Intergenic	0.320994	20.96	ENSG00000186174	0.0948969	51.3731	48.1027
chr10	27064680	27065682	intron	0.320977	9.5	ENSG00000148459	-0.0694832	10.7529	11.2835
chr6	11810326	11811325	Intergenic	0.32075	5.58	ENSG00000234427		0.0220089	0
chr15	43541590	43542589	intron	0.320375	6.94	ENSG00000104055	0.256099	0.123951	0.10379
chr14	51808569	51809656	intron	0.320127	31.07	ENSG00000258479	-0.277156	0.417353	0.50575
chr4	184921606	184922634	intron	0.320028	41.63	ENSG00000250726	1.09851	0.0331713	0.015491
chr12	34141607	34142606	Intergenic	0.320019	11.46	ENSG00000201624	0	0	0
chr4	74365837	74366941	intron	0.319971	4.68	ENSG00000250436	-0.00663348	0.0267789	0.0269023
chr16	88700883	88701991	Intergenic	0.319922	21.57	ENSG00000124391	1.77625	0.347385	0.101416
chr6	47108476	47109475	Intergenic	0.319911	6.03	ENSG00000153292	0.0712163	74.9355	71.3263
chr2	113562050	113563116	Intergenic	0.319876	13.88	ENSG00000115008	2.13369	208.623	47.54
chr5	145325521	145326562	intron	0.319757	30.77	ENSG00000156463	0.0154505	15.6557	15.489
chr6	106048476	106049573	Intergenic	0.319505	10.71	ENSG00000237567	0	0	0
chr12	51418189	51419513	intron	0.319301	113.72	ENSG00000110911	0.214993	33.4621	28.8292
chr18	57944686	57945685	Intergenic	0.319239	4.37	ENSG00000267401	0	0	0
chr3	66653296	66654295	Intergenic	0.319239	7.84	ENSG00000271174	0	0	0
chr11	114237418	114238417	intron	0.31914	3.92	ENSG00000221112	0	0	0
chr14	94528582	94529619	intron	0.319134	18.55	ENSG00000089737	0.0308645	134.683	131.832
chr8	39804370	39805417	intron	0.318908	32.12	ENSG00000131203	0.275266	3.11304	2.5723
chr5	127277672	127278688	Intergenic	0.318795	7.54	ENSG00000245937	0.140477	14.4409	13.1011
chr6	137539426	137540673	intron	0.31879	12.67	ENSG00000027697	0.417059	77.6372	58.1463
chr7	17273746	17274769	Intergenic	0.318785	20.96	ENSG00000106546	0.22695	34.5478	29.519
chr18	47135629	47136628	Intergenic	0.318682	11.31	ENSG00000267444	0	0	0
chr14	35825157	35826194	Intergenic	0.318652	33.33	ENSG00000258860	0	0	0
chr1	172795370	172796381	Intergenic	0.318606	7.24	ENSG00000224000	-0.895802	0.0926481	0.172385
chr6	37758507	37759623	Intergenic	0.318412	12.37	ENSG00000225945	-0.41015	0.197542	0.262499
chr4	88442586	88443585	intron	0.318324	9.5	ENSG00000152583	-0.184268	1.01551	1.15386
chr1	212731670	212732681	Intergenic	0.317995	14.03	ENSG00000260805	0.0701774	0.19062	0.18157
chr13	111560394	111561427	intron	0.317912	10.86	ENSG00000088448	-0.0784044	56.8571	60.0325
chr12	15753289	15754288	Intergenic	0.317417	4.52	ENSG00000134533	-0.0209807	3.76829	3.82349
chr6	126193151	126194194	intron	0.316846	62.59	ENSG00000232131	0	0	0
chr6	31514974	31516075	promoter-TSS	0.316826	17.65	ENSG00000198563	-0.000382545	348.412	348.505
chr3	69150896	69151895	intron	0.316566	7.09	ENSG00000144746	-0.00218767	47.5646	47.6368
chr11	46269895	46270939	Intergenic	0.316222	32.73	ENSG00000254639	-0.483612	0.279687	0.39107
chr18	2981036	2982146	intron	0.316173	7.54	ENSG00000101577	0.133571	4.25715	3.8807
chr2	216576367	216577371	intron	0.315776	6.33	ENSG00000216721	0	0	0
chr18	49141358	49142357	Intergenic	0.315742	14.33	ENSG00000265402	0	0	0
chr22	31691815	31692837	Intergenic	0.315726	5.28	ENSG00000212542	0	0	0
chr10	3848083	3849094	Intergenic	0.315263	57.61	ENSG00000067082	0.686884	20.6175	12.8075
chr3	132348573	132349595	intron	0.315221	14.78	ENSG00000081307	-0.0146015	55.3314	55.8943
chr4	74734487	74735655	promoter-TSS	0.315161	50.52	ENSG00000163739	2.1594	597.206	133.684
chr6	12491074	12492094	Intergenic	0.314305	48.26	ENSG00000212802	-0.0251881	236.346	240.509
chr1	27126420	27127419	Intergenic	0.314303	4.22	ENSG00000060642	0.0413069	7.40906	7.19994
chr7	22637481	22638480	Intergenic	0.314204	17.04	ENSG00000105889	-0.110298	3.78975	4.09085
chr4	157866486	157867485	intron	0.314202	4.22	ENSG00000145431	-0.0451966	22.3219	23.0323
chr7	92263116	92264469	intron	0.31419	61.53	ENSG00000237819	0.165597	2.82181	2.51581
chr13	101527694	101528727	intron	0.313866	47.81	ENSG00000233009	0.255846	0.029107	0.024377
chr1	24610720	24611880	Intergenic	0.313803	14.48	ENSG00000266511	0	0	0
chr7	83671246	83672506	intron	0.3138	30.31	ENSG00000222994	0	0	0
chr21	27306852	27307931	intron	0.313748	12.52	ENSG00000224541		0	0.0722962
chr7	134298331	134299330	Intergenic	0.313693	13.12	ENSG00000172331	0.233072	10.5827	9.00394
chr2	151018322	151019321	Intergenic	0.313587	11.01	ENSG00000230645	2.14834	0.183628	0.0414214
chr6	152037257	152038256	intron	0.313581	3.32	ENSG00000091831	0.0854432	0.757174	0.713632
chr4	98418592	98419685	Intergenic	0.313548	5.13	ENSG00000214904	0	0	0
chr16	16134793	16135792	intron	0.313306	11.91	ENSG00000103222	0.0492701	30.3393	29.3207
chr1	223254281	223255280	Intergenic	0.313177	15.23	ENSG00000187554	-0.565359	0.134821	0.199502
chr7	120046846	120047845	intron	0.312869	17.95	ENSG00000184408	-0.125755	0.00277817	0.0030312
chr15	92433664	92434757	intron	0.312795	7.24	ENSG00000176463	0.105824	30.8669	28.6838
chr18	20722836	20723846	intron	0.312795	4.52	ENSG00000134508	0.125705	6.29979	5.77411
chr8	22931211	22932369	intron	0.312779	33.18	ENSG00000120889	0.578942	94.6143	63.34
chr2	202476936	202477935	intron	0.312384	16.89	ENSG00000155754	-1.30468	0.0046152	0.0114009
chrX	10579618	10580617	intron	0.312285	4.52	ENSG00000207202	0	0	0
chr14	63958795	63959794	intron	0.312117	12.07	ENSG00000154001	-0.0140374	31.3674	31.6741
chr7	92320781	92321780	intron	0.312068	13.42	ENSG00000237819	0.165597	2.82181	2.51581
chr2	191583186	191584266	Intergenic	0.311887	71.49	ENSG00000228509	0.313731	3.91691	3.15138
chr5	40775781	40776788	intron	0.311864	22.92	ENSG00000113638	-0.166199	7.60896	8.538
chr19	43979279	43980290	intron	0.311708	8.14	ENSG00000124466	0.085253	6.52289	6.1486
chr5	131794089	131795230	intron	0.311571	20.81	ENSG00000234290	0.294911	0.64322	0.524303
chr10	33797983	33798982	Intergenic	0.311481	11.16	ENSG00000226412	0	0	0
chr8	138161111	138162132	Intergenic	0.311405	21.87	ENSG00000206678	0	0	0
chr12	122154620	122155619	intron	0.311193	10.41	ENSG00000188735	-0.0768691	12.3139	12.9878
chr1	32420782	32421810	Intergenic	0.311001	19.15	ENSG00000184007	0.0299824	169.509	166.022
chr6	116362826	116363873	intron	0.310762	10.71	ENSG00000111816	0.0185928	2.78761	2.75191
chr3	71056307	71057306	intron	0.310748	5.73	ENSG00000244203		0	0.0427973
chr18	33391347	33392357	Intergenic	0.310729	46.3	ENSG00000267797		0.0101621	0
chr10	95184885	95185959	intron	0.310706	5.73	ENSG00000138119	0.0242193	86.4888	85.0489
chr4	109770528	109771585	intron	0.310701	11.16	ENSG00000250185	0	0	0
chr2	137885986	137886985	intron	0.310578	3.32	ENSG00000144229	0.186314	0.397377	0.349234
chr1	40420970	40421981	intron	0.310566	48.11	ENSG00000168389	0.816152	14.2815	8.11124
chr4	55147128	55148135	intron	0.310366	11.91	ENSG00000072201	0.169383	7.50838	6.67663
chr17	79360527	79361533	Intergenic	0.310275	6.94	ENSG00000262223	-2.3565	0.0144753	0.0741317
chr19	6828087	6829086	intron	0.310264	3.17	ENSG00000141968	-0.110295	3.13962	3.38906
chr1	193387170	193388169	Intergenic	0.310195	5.13	ENSG00000232077		0.0115857	0
chr17	40476787	40478044	intron	0.310131	18.7	ENSG00000126561	0.133539	2.84621	2.59459
chr1	22555432	22556469	Intergenic	0.31004	79.48	ENSG00000266564	0	0	0
chr6	143206176	143207223	intron	0.309992	147.05	ENSG00000010818	0.467147	9.16884	6.63269
chr3	69337707	69338713	intron	0.309864	34.54	ENSG00000163380	-0.646282	0.0273965	0.042879
chr1	27175011	27176131	intron	0.309312	6.33	ENSG00000175793	0.150985	246.611	222.107
chr5	127967422	127968421	Intergenic	0.309132	5.13	ENSG00000113396	-0.670288	0.00634322	0.0100945
chr3	168851584	168852583	intron	0.309021	18.4	ENSG00000241479	-0.219851	0.0204064	0.0237656
chr22	28262262	28263464	intron	0.308902	13.57	ENSG00000199797	0	0	0
chr2	32514122	32515121	intron	0.308856	3.77	ENSG00000119820	0.0731705	24.3746	23.1692
chr21	27530802	27532081	intron	0.308841	3.92	ENSG00000142192	0.0089073	287.033	285.266
chr1	8959332	8960427	Intergenic	0.308684	14.93	ENSG00000238249	0.119072	0.353277	0.32529
chr10	3966345	3967382	Intergenic	0.308536	10.86	ENSG00000226005	0	0	0
chr5	149978389	149979471	Intergenic	0.308473	37.4	ENSG00000171992	0.113731	7.09657	6.55861
chr4	6482028	6483235	intron	0.308278	19	ENSG00000074211	-0.128057	6.06573	6.62876
chr1	27480120	27481181	non-coding	0.308081	3.62	ENSG00000090020	0.117447	21.5494	19.8646
chr16	55697083	55698217	intron	0.307841	35.74	ENSG00000103546	0.14553	0.29673	0.268258
chr6	91115901	91116900	Intergenic	0.307732	24.58	ENSG00000252676	0	0	0
chrX	9989384	9990429	intron	0.307692	5.43	ENSG00000047644	-0.0429327	3.8001	3.91489
chr1	27325320	27326430	intron	0.307681	13.12	ENSG00000253368	0.155175	2.22204	1.99545
chr9	117967211	117968294	intron	0.307527	15.38	ENSG00000173077	0.324913	0.0270311	0.0215802
chr5	56594430	56595471	Intergenic	0.307485	7.69	ENSG00000248586		0.00417559	0
chr4	157182286	157183285	Intergenic	0.307408	10.1	ENSG00000221189	0	0	0
chr16	69019693	69020692	intron	0.307381	6.64	ENSG00000199979	0	0	0
chr1	40777820	40778819	intron	0.307352	10.41	ENSG00000049089	0.270608	3.38856	2.80901
chr2	159954967	159956071	intron	0.307221	97.28	ENSG00000115183	0.0476823	12.4725	12.067
chr19	46271729	46272940	TTS	0.307182	14.18	ENSG00000259605	-0.238023	0.0775665	0.09148
chr13	44874878	44875993	Intergenic	0.307061	105.42	ENSG00000139656	0.473008	0.293168	0.211216
chr20	6643724	6644723	Intergenic	0.307003	33.63	ENSG00000228482		0	0.0275389
chr1	92650011	92651031	TTS	0.306925	35.89	ENSG00000069712	0.149539	0.337634	0.30439
chr2	201468467	201469521	intron	0.306766	6.79	ENSG00000138356	-0.180851	3.43737	3.89643
chr12	63096620	63097704	intron	0.306683	52.79	ENSG00000213352		0	0.0180394
chr3	106926496	106927522	intron	0.306601	30.46	ENSG00000239455	0.0531356	0.0139342	0.0134303
chr7	31815496	31816495	intron	0.306553	7.09	ENSG00000223070	0	0	0
chr9	21854445	21855460	intron	0.306516	12.52	ENSG00000099810	-0.00717006	45.8364	46.0648
chrX	13252622	13253767	Intergenic	0.306434	5.28	ENSG00000235385	0.0218935	0.198413	0.195425
chr18	20957858	20958857	intron	0.306331	3.32	ENSG00000134490	-0.107614	5.02015	5.40894
chr1	118808470	118809469	Intergenic	0.306093	9.05	ENSG00000222209	0	0	0
chr17	63019137	63020144	intron	0.306082	7.84	ENSG00000266598		0.0231459	0
chr11	93885111	93886110	intron	0.305981	20.96	ENSG00000110218	0.127838	34.5317	31.6034
chr5	67987072	67988071	Intergenic	0.305384	25.04	ENSG00000212249	0	0	0
chr1	169029382	169030510	intron	0.305214	22.92	ENSG00000203601	0.261859	0.0938008	0.078231
chr8	48299518	48300569	intron	0.305066	3.17	ENSG00000164808	-0.135058	22.9775	25.2324
chr21	15676428	15677431	Intergenic	0.304996	3.62	ENSG00000243064	0.033268	0.175646	0.171642
chr4	84672386	84673405	Intergenic	0.304939	3.17	ENSG00000249171	0	0	0
chr2	139183400	139184416	Intergenic	0.304829	119.9	ENSG00000230569	0.196503	0.0123232	0.010754
chr1	33446470	33447481	Intergenic	0.30478	25.34	ENSG00000217644	0.66198	0.110265	0.0696888
chr7	102532020	102533180	intron	0.304652	11.61	ENSG00000128606	0.0412637	13.5264	13.145
chr21	30559732	30560827	Intergenic	0.30432	6.64	ENSG00000224649		0.117775	0
chr2	238188717	238189835	Intergenic	0.304302	13.88	ENSG00000224132	0	0	0
chr20	1464691	1465735	intron	0.304302	18.1	ENSG00000088833	0.0621889	50.8327	48.6881
chr6	14882476	14883475	Intergenic	0.304297	9.05	ENSG00000234261	0	0	0
chrX	109083418	109084471	Intergenic	0.304246	14.03	ENSG00000225381	0	0	0
chr20	19782961	19783960	Intergenic	0.304137	4.52	ENSG00000268628	-2.30754	0.0432128	0.213919
chr18	77153958	77154957	Intergenic	0.304124	2.11	ENSG00000131196	0.186858	1.01558	0.892208
chr6	144471426	144472473	intron	0.304023	9.95	ENSG00000135604	0.650405	1.61613	1.02964
chr5	142641830	142642871	Intergenic	0.303835	8.9	ENSG00000231579	0.0292483	20.5869	20.1737
chr14	35834469	35835531	Intergenic	0.303815	20.36	ENSG00000258860	0	0	0
chrX	104796530	104797533	intron	0.303691	5.88	ENSG00000133149		0.00578528	0
chr13	34622794	34623793	Intergenic	0.303281	12.22	ENSG00000227254	0	0	0
chr6	116719074	116720156	intron	0.303281	4.68	ENSG00000189241	-0.0547802	12.7036	13.1952
chr1	162024778	162025777	Intergenic	0.303247	6.64	ENSG00000198929	-0.364327	1.45622	1.87457
chr12	28650539	28651538	intron	0.303247	15.08	ENSG00000244712	0.874245	0.222328	0.121289
chr1	235459582	235460777	intron	0.303242	10.26	ENSG00000054267	0.134854	11.6461	10.6068
chr10	35046885	35047894	intron	0.303006	73.15	ENSG00000148498	-0.00221294	28.303	28.3465
chr13	76372244	76373277	intron	0.302792	9.8	ENSG00000230902	0	0	0
chr3	9690823	9691883	exon	0.302176	9.05	ENSG00000163719	0.214967	10.5594	9.09764
chr6	138001876	138002900	Intergenic	0.3021	8.75	ENSG00000230533	-0.445289	0.219518	0.298893
chrX	16676434	16677621	intron	0.302076	2.71	ENSG00000047230	-0.023961	6.6735	6.78526
chr12	19373689	19374688	intron	0.301938	7.24	ENSG00000052126	-0.064044	9.52032	9.95247
chr11	118478399	118479510	intron	0.301931	9.05	ENSG00000019144	-0.211252	18.1095	20.9652
chr5	61563530	61564821	Intergenic	0.301786	20.81	ENSG00000068796	-0.0244331	38.1751	38.8271
chr3	57944723	57945945	Intergenic	0.30173	10.1	ENSG00000213509	0.29003	0.510011	0.41713
chr1	212658678	212659881	Intergenic	0.301635	37.4	ENSG00000224535	0	0	0
chr15	92701340	92702357	intron	0.301584	11.61	ENSG00000258761	0.049076	4.97434	4.80797
chr16	28152683	28153682	intron	0.301565	3.92	ENSG00000200138	0	0	0
chr19	4337979	4339015	intron	0.30135	22.62	ENSG00000178078	0.0846197	40.8538	38.5265
chr17	53249427	53250426	Intergenic	0.301212	34.39	ENSG00000261589	-0.11613	0.061335	0.0664763
chr3	15935014	15936045	Intergenic	0.301057	16.44	ENSG00000224728	-0.0743422	0.278981	0.293734
chr1	224267520	224268519	Intergenic	0.300976	20.06	ENSG00000252484	0	0	0
chr8	89684783	89685782	Intergenic	0.300643	25.19	ENSG00000156103	0.318196	5.65573	4.5363
chr9	12708309	12709448	intron	0.300509	5.58	ENSG00000107165	-0.273005	1.17089	1.41482
chr2	225906386	225907566	exon	0.300468	10.1	ENSG00000135905	0.134644	12.1488	11.0663
chr11	105015795	105016794	Intergenic	0.30042	13.57	ENSG00000255501	0	0	0
chr12	12029546	12030669	intron	0.300404	4.22	ENSG00000121380	-0.558113	0.281609	0.414624
chr11	29301868	29303144	Intergenic	0.30036	25.04	ENSG00000211499	0	0	0
chr12	51255839	51256995	intron	0.300237	4.07	ENSG00000186452	-0.0890076	0.00666512	0.00708927
chr16	46607072	46608071	Intergenic	0.300237	4.68	ENSG00000260251	0	0	0
chr6	16669424	16670525	intron	0.300157	10.41	ENSG00000124788	0.109809	4.71809	4.3723
chr4	122076687	122077686	intron	0.300143	5.43	ENSG00000271302	0	0	0
chr3	160384246	160385372	Intergenic	0.300114	12.82	ENSG00000179674	1.29518	6.19083	2.52267
chr2	31961572	31962571	Intergenic	0.300045	9.8	ENSG00000223647	0	0	0
chr15	49687790	49688789	intron	0.299666	7.09	ENSG00000166200	0.00327482	84.9693	84.7767
chrX	71029451	71030450	Intergenic	0.299666	10.26	ENSG00000224617	0	0	0
chr4	186603085	186604084	intron	0.299598	10.56	ENSG00000233110	0.150631	0.473067	0.426165
chr3	69291864	69292906	intron	0.299474	34.84	ENSG00000163380	-0.646282	0.0273965	0.042879
chr3	171874134	171875180	intron	0.299332	66.06	ENSG00000075420	0.146051	61.2317	55.3364
chr1	235147631	235148727	Intergenic	0.299234	44.19	ENSG00000258082	-0.0213949	0.0342429	0.0347545
chr5	142356872	142357888	intron	0.299132	10.56	ENSG00000145819	0.147433	15.1362	13.6658
chr18	55875908	55876996	intron	0.299047	3.47	ENSG00000049759	0.0952325	130.747	122.395
chr13	74185044	74186043	Intergenic	0.299044	7.54	ENSG00000224853	0	0	0
chr20	37644541	37645623	intron	0.299025	43.74	ENSG00000223864	-0.0796963	20.7264	21.9036
chr8	67424420	67425567	intron	0.298884	63.19	ENSG00000206949	0	0	0
chr8	56445761	56446760	Intergenic	0.298872	5.43	ENSG00000270907		0.00132987	0
chr1	221975128	221976127	Intergenic	0.298806	6.49	ENSG00000200033	0	0	0
chr4	185632487	185633486	intron	0.298806	5.58	ENSG00000151725	-0.0713984	99.2095	104.243
chr1	231520378	231521430	intron	0.298786	12.07	ENSG00000116903	0.0557193	5.74991	5.53207
chr12	102329389	102330388	Intergenic	0.298773	19.76	ENSG00000136048	-0.062754	14.0444	14.6687
chr1	203274420	203275481	promoter-TSS	0.298727	9.65	ENSG00000233791	2.29235	0.128034	0.0261372
chr14	61620470	61621531	Intergenic	0.298695	9.65	ENSG00000027075	-0.0404937	23.9601	24.6421
chr5	176766213	176767212	intron	0.29863	5.43	ENSG00000239393	0	0	0
chr1	153336920	153337919	Intergenic	0.298235	12.22	ENSG00000163220	-0.0245443	105.323	107.13
chr2	192476850	192477866	Intergenic	0.298012	14.78	ENSG00000173559	0.244482	112.794	95.2115
chr6	41273296	41274356	Intergenic	0.297959	28.81	ENSG00000213461	0	0	0
chr11	118157268	118158267	Intergenic	0.297848	9.8	ENSG00000198851	-1.72294	0.0169203	0.0558555
chr9	6079695	6080694	Intergenic	0.297816	5.13	ENSG00000228739		0.0227308	0
chr1	223963578	223964631	TTS	0.297783	14.18	ENSG00000143514	0.258906	32.6568	27.292
chr4	22180778	22181834	Intergenic	0.297606	12.67	ENSG00000238383		0	7.16148
chr11	102816811	102817810	intron	0.297605	112.96	ENSG00000137745	1.9986	197.394	49.3962
chr18	56272708	56273707	intron	0.29747	16.14	ENSG00000198796	0.315862	0.074497	0.0598487
chr4	17068187	17069355	Intergenic	0.297458	6.94	ENSG00000249998	0	0	0
chr19	18391729	18392840	promoter-TSS	0.296933	4.22	ENSG00000267959	0.146514	0.102531	0.0926301
chr4	146428692	146429735	intron	0.296819	32.27	ENSG00000170365	0.04206	22.8315	22.1755
chr1	243712332	243713360	intron	0.296627	8.45	ENSG00000054282	-0.028673	37.2389	37.9864
chr12	74884070	74885069	Intergenic	0.296627	3.47	ENSG00000253719	-0.0572875	20.9994	21.85
chr15	98046508	98047589	intron	0.29662	16.89	ENSG00000259524	0	0	0
chr1	224075361	224076431	Intergenic	0.296606	55.95	ENSG00000188460	-0.54711	0.0537155	0.0784866
chr15	42384514	42385513	intron	0.29654	7.69	ENSG00000159337	1.19989	0.0942501	0.0410279
chr22	35696237	35697249	intron	0.296255	3.17	ENSG00000100284	0.128406	6.77628	6.19922
chrX	129095301	129096300	Intergenic	0.296224	4.22	ENSG00000235189		0	0.0208971
chr7	123396720	123397915	Intergenic	0.296204	7.24	ENSG00000106299	0.0130971	7.40158	7.33469
chr4	81186786	81187841	promoter-TSS	0.29613	6.33	ENSG00000138675	0.155457	4.07214	3.65616
chr6	36386476	36387475	intron	0.295967	8.14	ENSG00000112078	-0.0292062	18.9746	19.3627
chr3	121201207	121202206	intron	0.295829	4.98	ENSG00000242445	0.102794	23.1586	21.5659
chr10	30872030	30873094	Intergenic	0.295812	54.75	ENSG00000230298	0	0	0
chr13	76362044	76363043	intron	0.295661	7.39	ENSG00000230902	0	0	0
chr19	42625420	42626440	intron	0.295364	74.2	ENSG00000254887	1.2113	0.35526	0.153429
chr4	7829986	7830985	intron	0.295353	11.46	ENSG00000228919	0.617842	0.100141	0.0652565
chr4	48095436	48096727	intron	0.29522	28.2	ENSG00000074966	0.279333	1.11897	0.921999
chr21	17121276	17122275	intron	0.295162	2.26	ENSG00000155313	-0.141229	19.0849	21.0476
chrX	46524551	46525721	intron	0.294986	0.3	ENSG00000147119	0.0779552	2.83825	2.68896
chr17	2796334	2797362	intron	0.294697	14.18	ENSG00000132359	-0.222294	3.49255	4.07436
chr11	47545361	47546360	promoter-TSS	0.29458	7.09	ENSG00000110536	0.0181274	86.6151	85.5336
chr14	91294095	91295181	Intergenic	0.29457	6.79	ENSG00000258884	-0.2813	2.20424	2.67879
chr19	57900887	57901890	5'	0.294566	6.03	ENSG00000152433	0.234168	1.77675	1.51055
chr16	19566122	19567121	promoter-TSS	0.294557	5.13	ENSG00000103544	-0.397503	1.75252	2.30846
chr5	4614672	4615738	Intergenic	0.294319	11.31	ENSG00000231291	-0.26416	0.095586	0.114793
chr1	15499182	15500319	intron	0.294234	4.83	ENSG00000171729	0.0815059	8.7076	8.22929
chr16	1920292	1921292	intron	0.294192	8.75	ENSG00000063854	0.0764083	19.2478	18.2549
chr6	134084995	134085994	intron	0.293953	11.16	ENSG00000218213	1.1965	0.0308946	0.0134803
chr1	181013120	181014231	intron	0.293943	31.97	ENSG00000153029	-0.122067	25.3759	27.6165
chr11	120294890	120295894	intron	0.293678	5.43	ENSG00000269601	-0.105298	141.492	152.205
chr9	4893831	4894830	Intergenic	0.293336	6.18	ENSG00000228165	0	0	0
chr4	157214987	157216191	Intergenic	0.292894	23.53	ENSG00000221189	0	0	0
chr18	2167709	2168757	Intergenic	0.292724	16.14	ENSG00000263745	-0.0546954	0.636712	0.661314
chr9	117656645	117657648	intron	0.292686	4.68	ENSG00000106952	0.196503	0.0240979	0.0210293
chr13	97959878	97960942	intron	0.292675	36.95	ENSG00000202290	-0.16108	5.54756	6.20286
chr4	140335885	140336884	Intergenic	0.292613	10.56	ENSG00000109390	-0.0415392	98.9459	101.836
chr8	106728461	106729460	intron	0.292599	6.79	ENSG00000201627	0	0	0
[truncated: 35,477 more rows]
